# Supplementary material for: Active site-directed proteomic probes for adenylation domains in nonribosomal peptide synthetases
Source: Royal Society of Chemistry journal article supplement (doi:10.1039/c4cc09412c), 2014-12-22

Supporting information

## **Active site-directed proteomic probes for adenylation domains in nonribosomal peptide synthetases**

Sho Konno,<sup>†</sup> Fumihiro Ishikawa,<sup>†,\*</sup> Takehiro Suzuki,<sup>§</sup> Naoshi Dohmae,<sup>§</sup> Michael D. Burkart,<sup>‡</sup> and  
Hideaki Kakeya<sup>†,\*</sup>

<sup>†</sup>*Department of System Chemotherapy and Molecular Sciences, Division of Bioinformatics and Chemical Genomics, Graduate School of Pharmaceutical Sciences, Kyoto University, Sakyo, Kyoto 606-8501, Japan*

<sup>§</sup>*RIKEN Global Research Cluster, RIKEN, 2-1 Hirosawa, Wako, Saitama 351-0198, Japan*

<sup>‡</sup>*Department of Chemistry and Biochemistry, University of California, San Diego, 9500 Gilman Drive, La Jolla, California 92093-0358, USA*

\*Correspondence and request for materials should be directed via email to

F. Ishikawa (fishika@pharm.kyoto-u.ac.jp) or H. Kakeya (scseigyohisyo@pharm.kyoto-u.ac.jp).

| <b>Contents:</b>                                             | <b>Page</b> |
|--------------------------------------------------------------|-------------|
| Supplementary Figure S1                                      | S3          |
| Supplementary Figure S2                                      | S4          |
| Supplementary Figure S3                                      | S5          |
| Full scale images of gels used in Figure 3                   |             |
| Supplementary Figure S4                                      | S6          |
| Full scale images of gels used in Figure 4                   |             |
| Supplementary Figure S5                                      | S7-S9       |
| Supplementary Figure S6                                      | S10-S11     |
| Supplementary Scheme S1                                      | S12         |
| Supplementary Scheme S2                                      | S13         |
| Supplementary Scheme S3                                      | S13         |
| Chemical Synthetic Procedures                                | S13-S25     |
| Chemical Biology Procedures                                  | S25-S28     |
| References                                                   | S28-S29     |
| Copies of $^1\text{H}$ -NMR and $^{13}\text{C}$ -NMR spectra | S30-S48     |

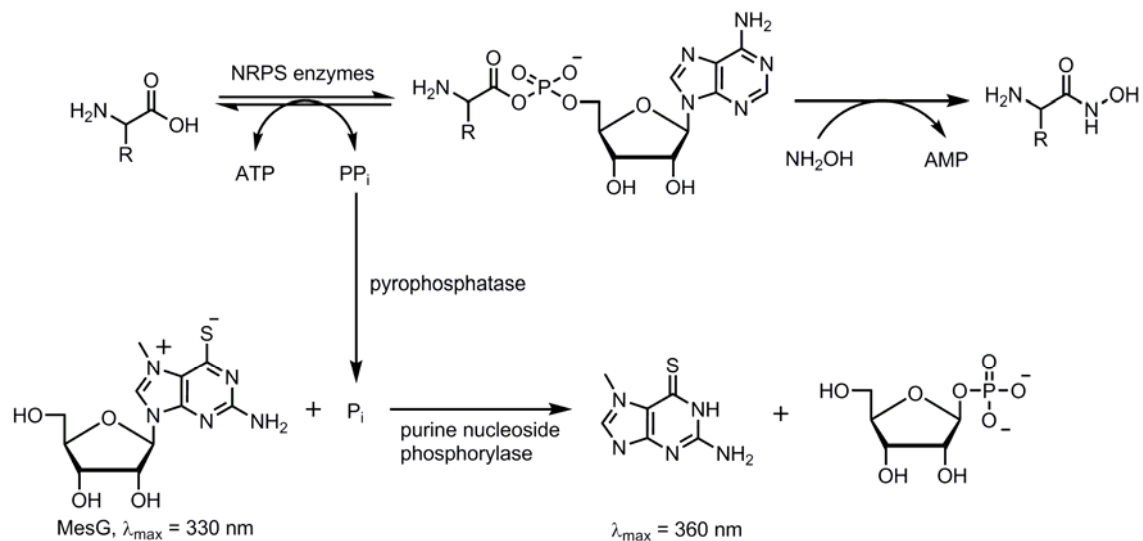

**Figure S1. Schematic summary of the hydroxamate formation assay.**<sup>1</sup> In the absence of the native acceptor, the tightly bound aminoacyl-adenylate can be released with hydroxylamine, forming the aminoacyl hydroxamate and releasing AMP. Product formation can then be monitored by coupling the release of pyrophosphate (PP<sub>i</sub>) to the cleavage of the ultraviolet indicator MesG in a continuous format.

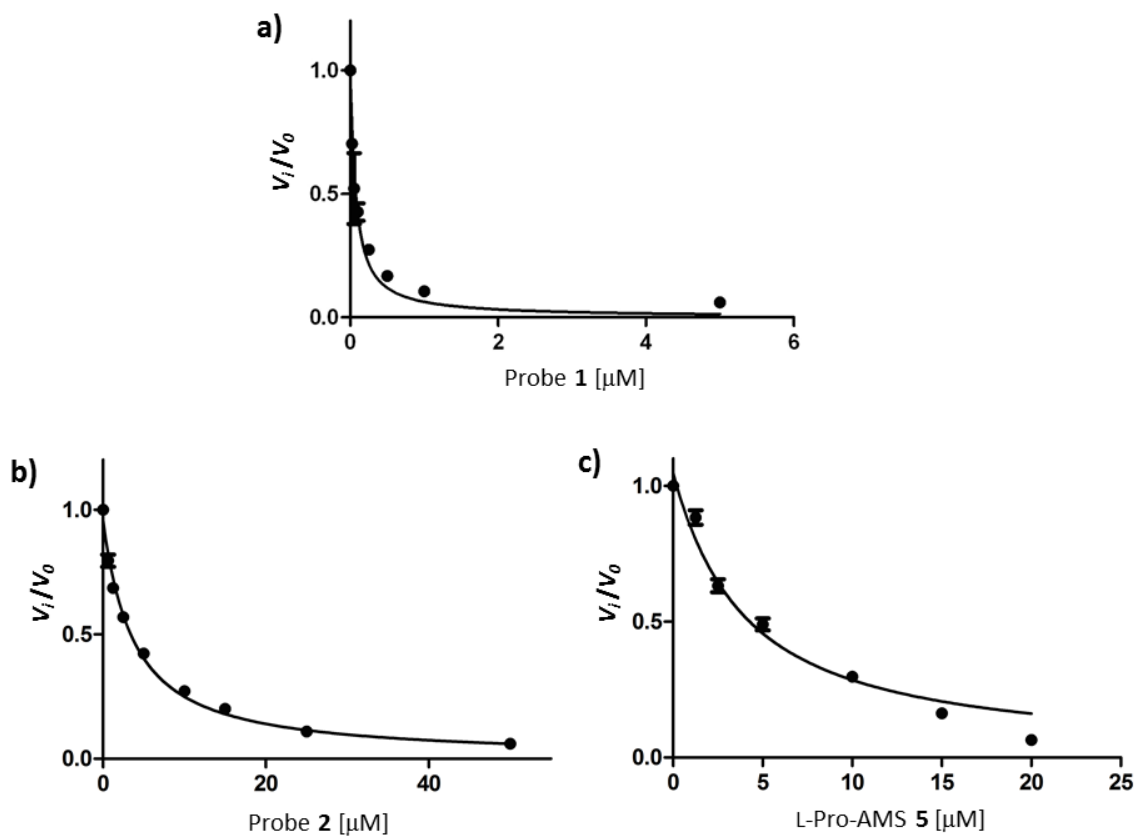

**Figure S2. Inhibitory activities of recombinant NRPS enzymes by L-Phe-AMS-BPyne 1, L-Pro-AMS-BPyne 2, and L-Pro-AMS 5.** (a) Inhibition of *holo*-GrsA by **1**. The reactions contained 20 nM GrsA, 1 mM L-Phe, standard assay buffer [20 mM Tris (pH 8.0), 2.5 mM ATP, 1 mM  $\text{MgCl}_2$ , 1 mM TCEP, 150 mM hydroxylamine (pH 7.0), 0.1 U purine nucleoside phosphorylase, 0.04 U inorganic pyrophosphatase, and 0.2 mM MesG] and 0.0025% Igepal CA-630. (b) Inhibition of *holo*-TycB1 by **2**. The reactions contained 800 nM TycB1, 1 mM L-Pro, and the standard assay buffer. (c) Inhibition of *holo*-TycB1 by **5**. The reactions contained 800 nM TycB1, 1 mM L-Pro, and the standard assay buffer.

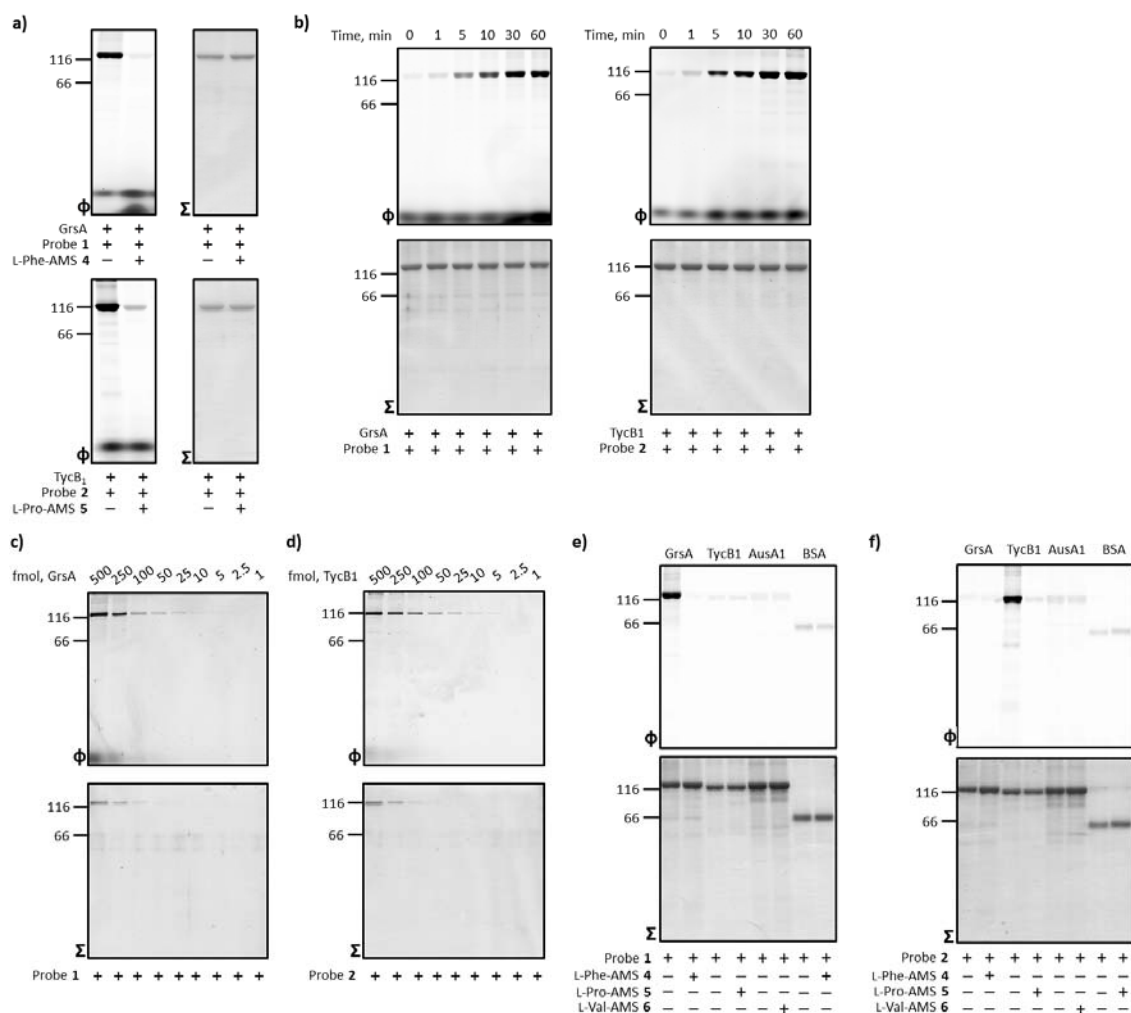

**Figure S3. Full images of SDS-PAGE gels from Figure 3.** Labeling of recombinant *holo*-GrsA and *holo*-TycB1 with probes 1 and 2. (a) Labeling of GrsA and TycB1 and competitive inhibition studies with excess inhibitors 4 and 5. GrsA (1  $\mu$ M) and TycB1 (1  $\mu$ M) were individually pre-incubated in either the absence or presence of 100  $\mu$ M of inhibitors 4 and 5 and treated with 1  $\mu$ M of the individual probes 1 and 2. (b) Ultraviolet photolysis time course studies of the labeling of GrsA with probe 1 (left) and TycB1 with probe 2 (right). SDS-PAGE analysis denoting the labeling of 1  $\mu$ M of GrsA and TycB1 with 1  $\mu$ M probes 1 and 2, respectively. (c, d) Limit of detection of GrsA and TycB1 labeling. GrsA (1–500 fmol) and TycB1 (1–500 fmol) were individually incubated with probes 1 and 2. (e, f) Labeling specificity of probes 1 and 2. GrsA (1  $\mu$ M), TycB1 (1  $\mu$ M), AusA1 (1  $\mu$ M), and BSA (1  $\mu$ M) were individually treated with 1  $\mu$ M of probes 1 and 2 in either the absence or presence of 100  $\mu$ M of the inhibitors 4, 5, and 6. For each panel, the top image ( $\Phi$ ) depicts the fluorescence observed with  $\lambda_{\text{ex}} = 532$  nm and  $\lambda_{\text{em}} = 580$  nm and the bottom ( $\Sigma$ ) denotes total protein content by staining with Coomassie (Colloidal Coomassie Blue Stain) or a silver staining method. a) Full image for gel in Fig. 3a. b) Full image for gel in Fig. 3b. c) Full image for gel in Fig. 3c. d) Full image for gel in Fig. 3d. e) Full image for gel in Fig. 3e. f) Full image for gel in Fig. 3f.

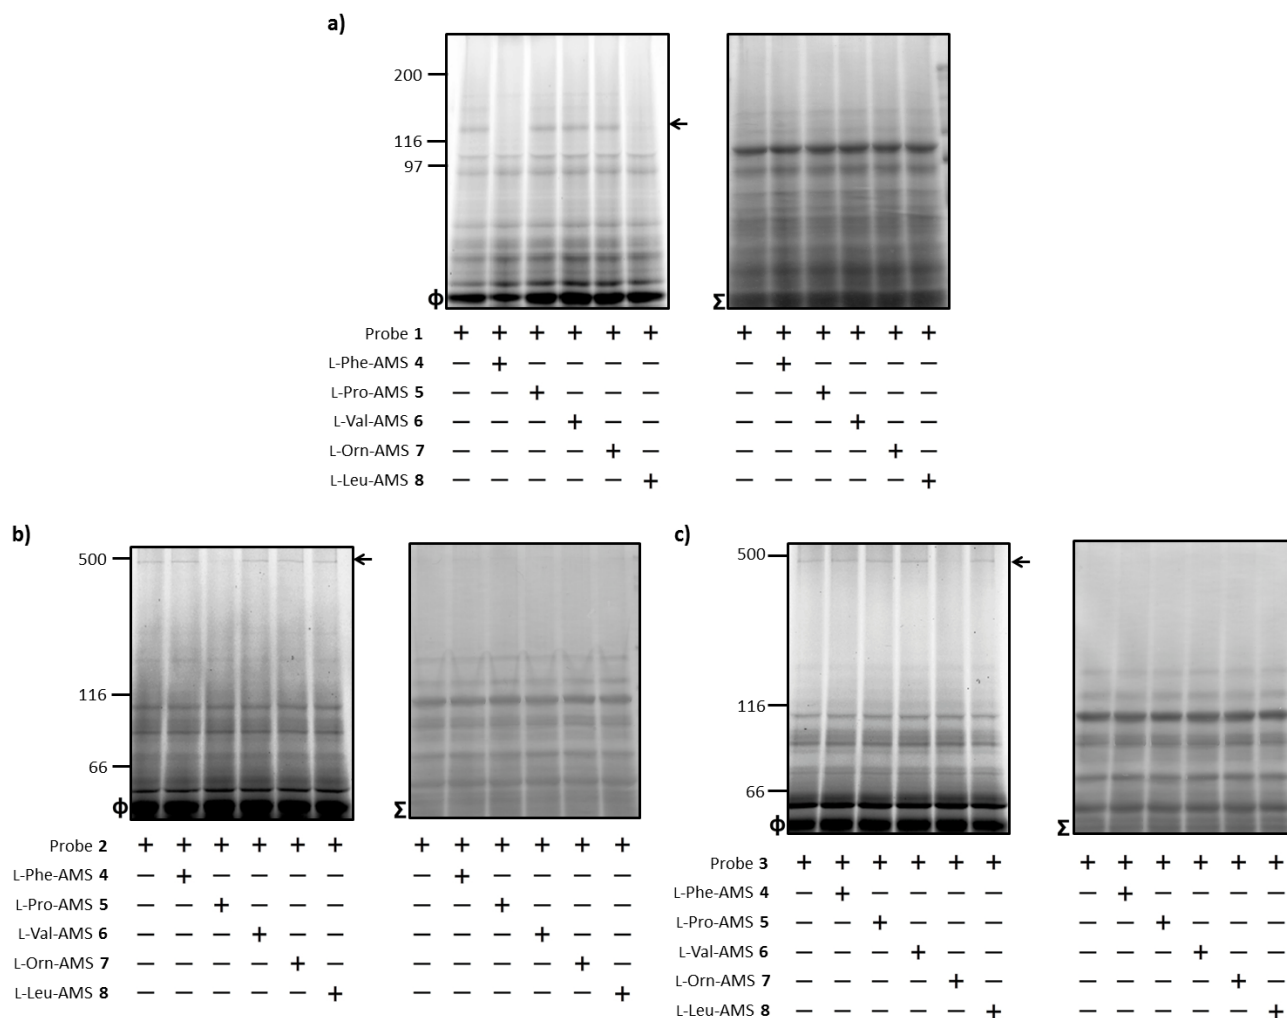

**Figure S4. Full images of SDS-PAGE gels from Figure 4d.** Proteomic applications of active site-directed proteomic probes **1–3** for A domains. (a) Individual labeling of A domains and profiling of A domain functions using a combination of probes **1–3** and inhibitors **4–8**. In order to investigate GrsA labeling, the *A. migulanus* ATCC 9999 lysate (1.5 mg/mL) was pre-incubated with individual members of inhibitors **4–8** (100  $\mu$ M) before the addition of 1  $\mu$ M of probe **1**. (b, c) To evaluate the labeling of GrsB, the *A. migulanus* DSM 5759 lysate (1.5 mg/mL) was individually treated with 100  $\mu$ M of inhibitors **4–8** before the addition of individual members of 1  $\mu$ M probes **2** and **3**. For each panel, the top image ( $\Phi$ ) depicts the fluorescence observed with  $\lambda_{\text{ex}} = 532$  nm and  $\lambda_{\text{em}} = 580$  nm and the bottom ( $\Sigma$ ) denotes total protein content by staining with Coomassie (Colloidal Coomassie Blue Stain). a) Full image for the top gel in Fig. 4d. b) Full image for the middle gel in Fig. 4d. c) Full image for the bottom gel in Fig. 4d.

Database : NCBItr 20140707 (45360603 sequences; 16206973370 residues)  
 Taxonomy : Firmicutes (gram-positive bacteria) (670881 sequences)

Protein hits : [gi|68845342](#) RefName: Full-Gramicidin S synthase 2; AltName: Full-Gramicidin S synthase II; Includes: RefName: Full-ATP-dependent proline adenylase; Short-ProA; AltName: Full-Proline activase; Includes: RefName: Full-ATP-dependent valine adenylase; Short-VaA; A  
[gi|68845358](#) RefName: Full-Gramicidin S synthase 2; AltName: Full-Gramicidin S synthase II; Includes: RefName: Full-ATP-dependent proline adenylase; Short-ProA; AltName: Full-Proline activase; Includes: RefName: Full-ATP-dependent valine adenylase; Short-VaA; A  
[gi|645381984](#) DNA-directed RNA polymerase, beta' subunit [Aneurimibacillus aneurimilyticus]

1. [gi|68845342](#) Mass: 508991 Score: 6884 Matches: 229(41) Sequences: 179(36) emPAL 1.57

RefName: Full-Gramicidin S synthase 2; AltName: Full-Gramicidin S synthase II; Includes: RefName: Full-ATP-dependent proline adenylase; Short-ProA; AltName: Full-Proline activase; Includes: RefName: Full-ATP-dependent valine adenylase; Short-VaA; A

| Query                | Observed | My(e)pt   | Mj(c)ic   | ppm   | Miss | Score | Expect   | Rank | Unique | Peptide                                          |
|----------------------|----------|-----------|-----------|-------|------|-------|----------|------|--------|--------------------------------------------------|
| <a href="#">32</a>   | 301.1996 | 630.3847  | 600.3846  | 0.07  | 0    | 22    | 24       | 1    | 1      | R.VELLK.L                                        |
| <a href="#">263</a>  | 331.1979 | 660.3812  | 660.3806  | 0.90  | 0    | 21    | 46       | 1    | 1      | R.NSSLK.G                                        |
| <a href="#">400</a>  | 339.7004 | 677.3861  | 677.3861  | 0.10  | 0    | 26    | 12       | 1    | 1      | K.VGFTVR.Q                                       |
| <a href="#">406</a>  | 340.6902 | 679.3658  | 679.3653  | 0.74  | 0    | 23    | 14       | 1    | 1      | R.FGSTR.I                                        |
| <a href="#">549</a>  | 350.1767 | 698.3388  | 698.3388  | 0.10  | 0    | 21    | 15       | 1    | 1      | R.YDVR.T                                         |
| <a href="#">590</a>  | 358.2384 | 714.4641  | 714.4640  | 0.26  | 0    | 31    | 1.8      | 1    | 1      | K.ATLLVAK.I                                      |
| <a href="#">682</a>  | 365.2348 | 728.4550  | 728.4545  | 0.71  | 0    | 36    | 1.3      | 1    | 1      | R.LVLTGR.H                                       |
| <a href="#">687</a>  | 367.6948 | 733.3751  | 733.3759  | -1.07 | 0    | 24    | 25       | 1    | 1      | R.EYVAPR.N                                       |
| <a href="#">782</a>  | 379.7116 | 757.4087  | 757.4082  | 0.57  | 0    | 24    | 14       | 1    | 1      | K.DLGNLR.C                                       |
| <a href="#">783</a>  | 379.7242 | 757.4339  | 757.4334  | 0.72  | 0    | 24    | 31       | 1    | 1      | R.GLEAAK.K                                       |
| <a href="#">799</a>  | 380.2219 | 758.4292  | 758.4286  | 0.70  | 0    | 26    | 19       | 1    | 1      | K.EATVARE.E                                      |
| <a href="#">835</a>  | 384.7525 | 767.4904  | 767.4905  | -0.08 | 0    | 21    | 3        | 1    | 1      | K.LPAGVAK.K                                      |
| <a href="#">868</a>  | 387.2476 | 772.4806  | 772.4807  | -0.13 | 0    | 27    | 7.6      | 1    | 1      | K.ATLVR.M                                        |
| <a href="#">997</a>  | 400.7351 | 798.4556  | 799.4552  | 0.51  | 0    | 28    | 7.5      | 1    | 1      | K.DVGLGR.V                                       |
| <a href="#">1308</a> | 424.2374 | 846.4602  | 846.4600  | 0.27  | 0    | 32    | 4.3      | 1    | 1      | R.LDTPVRL.L                                      |
| <a href="#">1362</a> | 438.2350 | 874.4553  | 874.4549  | 0.55  | 0    | 22    | 43       | 1    | 1      | R.TTFLHEK.I                                      |
| <a href="#">1388</a> | 448.7278 | 895.4411  | 895.4399  | 1.33  | 0    | 42    | 0.36     | 1    | 1      | U K.DGTLTYR.E                                    |
| <a href="#">1407</a> | 451.7450 | 901.4755  | 901.4756  | -0.15 | 0    | 20    | 30       | 1    | 1      | K.DVLDLAEK.L                                     |
| <a href="#">1462</a> | 463.7327 | 937.4508  | 937.4505  | 0.37  | 0    | 32    | 3.7      | 1    | 1      | K.TNWFQK.V                                       |
| <a href="#">1506</a> | 317.8466 | 950.5180  | 950.5185  | -0.50 | 1    | (25)  | 18       | 2    | 1      | R.TRLESAFK.R                                     |
| <a href="#">1507</a> | 478.2668 | 950.5191  | 950.5185  | 0.61  | 1    | 34    | 2        | 3    | 1      | R.TRLESAFK.R                                     |
| <a href="#">1529</a> | 485.2721 | 968.5296  | 968.5291  | 0.58  | 1    | (27)  | 6.1      | 1    | 1      | K.GLAELKRL + Gln-pro-Glu (N-term Q)              |
| <a href="#">1531</a> | 485.8058 | 969.5971  | 969.5971  | -0.02 | 0    | 50    | 0.032    | 1    | 1      | K.VLTGQLR.I                                      |
| <a href="#">1557</a> | 492.7722 | 983.5298  | 983.5287  | 1.04  | 0    | 20    | 30       | 1    | 1      | K.AVENPQV.L                                      |
| <a href="#">1558</a> | 329.5259 | 985.9558  | 985.9556  | 0.21  | 1    | 34    | 2.5      | 1    | 1      | K.GLAELKRL                                       |
| <a href="#">1561</a> | 497.2596 | 992.5047  | 992.5039  | 0.74  | 0    | 35    | 2.3      | 1    | 1      | K.KNTNIVQVR.E                                    |
| <a href="#">1860</a> | 504.7601 | 1007.5057 | 1007.4923 | 13.3  | 0    | 35    | 2.5      | 1    | 1      | R.EGAEQYK.Y                                      |
| <a href="#">1874</a> | 506.2585 | 1010.4985 | 1010.4855 | 12.9  | 0    | 26    | 15       | 1    | 1      | K.KLMDGLYR.V + Oxidation (M)                     |
| <a href="#">2015</a> | 522.8076 | 1043.6006 | 1043.5863 | 13.7  | 0    | 34    | 2.8      | 1    | 1      | R.LLGGDVEK.Q                                     |
| <a href="#">2163</a> | 533.2894 | 1064.5642 | 1064.5502 | 13.2  | 0    | 46    | 0.19     | 1    | 1      | K.LSYGELNAK.A                                    |
| <a href="#">2207</a> | 535.2777 | 1068.5409 | 1068.5274 | 12.6  | 0    | 34    | 1.8      | 1    | 1      | R.IGYMLDGVRL + Oxidation (M)                     |
| <a href="#">2306</a> | 358.8419 | 1073.5039 | 1073.5043 | -0.33 | 0    | 24    | 14       | 1    | 1      | K.DFTWHR.L                                       |
| <a href="#">2413</a> | 538.7996 | 1077.5946 | 1077.5706 | 12.9  | 0    | 29    | 7.7      | 1    | 1      | K.DGSEFLVKT                                      |
| <a href="#">2506</a> | 545.3019 | 1088.5893 | 1088.5794 | 12.8  | 0    | 34    | 3.3      | 1    | 1      | K.EFDVPLV.L                                      |
| <a href="#">2541</a> | 365.1625 | 1092.4657 | 1092.4608 | -0.12 | 0    | 27    | 4.8      | 1    | 1      | K.EHVGMVYR.L + Oxidation (M)                     |
| <a href="#">2581</a> | 367.2025 | 1098.5858 | 1098.5866 | 0.24  | 0    | 41    | 0.31     | 1    | 1      | K.AMAVISQVHK.E + Oxidation (M)                   |
| <a href="#">2634</a> | 368.8807 | 1106.6202 | 1106.6196 | 0.54  | 2    | 35    | 1.4      | 2    | 1      | R.TRLESAFK.R                                     |
| <a href="#">2637</a> | 370.2090 | 1107.8931 | 1107.8904 | 0.66  | 1    | (38)  | 1.1      | 1    | 1      | K.LFTDKTVER.M                                    |
| <a href="#">2638</a> | 554.8106 | 1107.6065 | 1107.5924 | 12.8  | 1    | 41    | 0.43     | 1    | 1      | K.LFTDKTVER.M                                    |
| <a href="#">2847</a> | 370.5293 | 1108.5661 | 1108.5666 | -0.44 | 0    | 36    | 1.8      | 1    | 1      | K.TPDHAAVGVK.D                                   |
| <a href="#">2853</a> | 566.8470 | 1131.6794 | 1131.6952 | 12.5  | 0    | 41    | 0.15     | 1    | 1      | K.QLGGTFVVK-                                     |
| <a href="#">2904</a> | 571.7689 | 1141.5232 | 1141.5074 | 13.8  | 0    | 44    | 0.14     | 1    | 1      | R.SDGMVYGR.V + Oxidation (M)                     |
| <a href="#">2914</a> | 572.8349 | 1143.6552 | 1143.6400 | 13.0  | 0    | 37    | 1.4      | 1    | 1      | K.RPVPVQLQK.D                                    |
| <a href="#">3002</a> | 578.8401 | 1155.6656 | 1155.6499 | 13.6  | 0    | 60    | 0.0043   | 1    | 1      | R.SLVGGDALSPLK.H                                 |
| <a href="#">3019</a> | 581.3365 | 1160.6584 | 1160.6441 | 12.3  | 0    | 60    | 0.0046   | 1    | 1      | K.EPLTLGQYK.D                                    |
| <a href="#">3022</a> | 582.2900 | 1162.9654 | 1162.9506 | 12.7  | 0    | 41    | 0.52     | 1    | 1      | K.EYDNPQK.A                                      |
| <a href="#">3033</a> | 389.2602 | 1164.7588 | 1164.7594 | -0.50 | 1    | 28    | 0.21     | 1    | 1      | K.KGPLGVVLE.K                                    |
| <a href="#">3034</a> | 583.3942 | 1164.7739 | 1164.7594 | 12.4  | 1    | (27)  | 0.17     | 1    | 1      | K.KGPLGVVLE.K                                    |
| <a href="#">3075</a> | 393.1947 | 1176.9623 | 1176.9531 | -0.71 | 0    | 31    | 4.8      | 1    | 1      | R.AMTMSQVHK.E + 2 Oxidation (M)                  |
| <a href="#">3076</a> | 589.2976 | 1176.9807 | 1176.9531 | 14.9  | 0    | (27)  | 1.6      | 1    | 1      | R.AMTMSQVHK.E + 2 Oxidation (M)                  |
| <a href="#">3217</a> | 397.8669 | 1190.8787 | 1190.8779 | 0.72  | 1    | 36    | 2.1      | 1    | 1      | K.DISSLDEHR.E                                    |
| <a href="#">3218</a> | 596.3032 | 1190.8918 | 1190.8779 | 11.7  | 1    | (33)  | 4.1      | 1    | 1      | K.DISSLDEHR.E                                    |
| <a href="#">3270</a> | 398.8951 | 1193.6634 | 1193.6629 | 0.45  | 1    | 21    | 29       | 1    | 1      | K.SLVNRHEAR.T                                    |
| <a href="#">3282</a> | 600.7966 | 1199.8787 | 1199.8645 | 11.9  | 0    | 44    | 0.17     | 1    | 1      | R.FLHAEFDR.S + Oxidation (M)                     |
| <a href="#">3284</a> | 401.5472 | 1201.6199 | 1201.6190 | 0.73  | 1    | 45    | 0.29     | 1    | 1      | K.EAVDKKADK.G                                    |
| <a href="#">3285</a> | 601.8256 | 1201.6366 | 1201.6190 | 14.6  | 1    | (26)  | 24       | 1    | 1      | K.EAVDKKADK.G                                    |
| <a href="#">3279</a> | 603.3321 | 1204.6497 | 1204.6340 | 13.1  | 0    | 38    | 1.2      | 1    | 1      | R.DVEGLFVLR.K                                    |
| <a href="#">3325</a> | 605.8016 | 1209.5886 | 1209.5733 | 12.6  | 0    | 22    | 40       | 1    | 1      | K.ESRIMMER.S + 2 Oxidation (M)                   |
| <a href="#">3426</a> | 407.8812 | 1220.5617 | 1220.5608 | 0.76  | 1    | 22    | 32       | 1    | 1      | K.KEHVGMVYR.L + Oxidation (M)                    |
| <a href="#">3443</a> | 408.5387 | 1222.5944 | 1222.5942 | 0.14  | 1    | 43    | 0.37     | 1    | 1      | R.SRLNEDTK.D                                     |
| <a href="#">3484</a> | 614.7664 | 1227.5182 | 1227.5012 | 13.8  | 0    | 22    | 13       | 1    | 1      | R.ENPQVMTRE.E + 2 Oxidation (M)                  |
| <a href="#">3489</a> | 614.8321 | 1227.5497 | 1227.5346 | 12.3  | 1    | 62    | 0.0036   | 1    | 1      | K.EEEAKDPVAK.K                                   |
| <a href="#">3492</a> | 615.8346 | 1229.6346 | 1229.6193 | 12.4  | 0    | 38    | 1.3      | 1    | 1      | K.FVPPFAPGER.M                                   |
| <a href="#">3494</a> | 615.8385 | 1229.6624 | 1229.6445 | 14.6  | 0    | 48    | 0.13     | 1    | 1      | K.FVPPFAPGER.M                                   |
| <a href="#">3533</a> | 619.3359 | 1236.6873 | 1236.6424 | 12.1  | 0    | 58    | 0.011    | 1    | 1      | K.LDPAFLYAK.K + Oxidation (M)                    |
| <a href="#">3550</a> | 415.2272 | 1242.6998 | 1242.6908 | -0.82 | 0    | (33)  | 3.2      | 1    | 1      | K.LAELHGYK.D                                     |
| <a href="#">3556</a> | 622.3456 | 1242.6766 | 1242.6608 | 12.7  | 0    | 37    | 1.3      | 1    | 1      | K.LAELHGYK.D                                     |
| <a href="#">3590</a> | 627.8134 | 1253.6121 | 1253.5962 | 12.7  | 0    | 45    | 0.23     | 1    | 1      | K.QMLRFNDTK.I + Oxidation (M)                    |
| <a href="#">3608</a> | 630.8486 | 1259.6826 | 1259.6663 | 13.0  | 0    | 41    | 0.74     | 1    | 1      | K.FVPPFAPGER.M                                   |
| <a href="#">3615</a> | 421.5639 | 1261.6700 | 1261.6707 | -0.56 | 0    | (28)  | 13       | 1    | 1      | R.TPHEFLLEV.Q                                    |
| <a href="#">3617</a> | 631.8501 | 1261.6856 | 1261.6707 | 11.9  | 0    | 31    | 6.7      | 1    | 1      | R.TPHEFLLEV.Q                                    |
| <a href="#">3630</a> | 422.5544 | 1264.6412 | 1264.6412 | 0.05  | 0    | 61    | 0.0078   | 1    | 1      | K.TPDHAAVDER.E                                   |
| <a href="#">3832</a> | 633.3367 | 1264.6589 | 1264.6412 | 14.0  | 0    | (49)  | 0.11     | 1    | 1      | K.TPDHAAVDER.E                                   |
| <a href="#">3847</a> | 635.8618 | 1269.7091 | 1269.6928 | 12.8  | 0    | 80    | 4.8e-005 | 1    | 1      | R.ELGEEAQLR.K                                    |
| <a href="#">3831</a> | 660.8461 | 1319.6776 | 1319.6605 | 12.7  | 0    | 26    | 22       | 1    | 1      | K.YVVPTELEK.L                                    |
| <a href="#">3837</a> | 441.5698 | 1321.6876 | 1321.6877 | -0.07 | 1    | (25)  | 30       | 1    | 1      | R.EKLSYQELNAK.A                                  |
| <a href="#">3840</a> | 661.6599 | 1321.7053 | 1321.6877 | 13.3  | 1    | 51    | 0.065    | 1    | 1      | R.EKLSYQELNAK.A                                  |
| <a href="#">3969</a> | 446.8969 | 1337.6689 | 1337.6683 | 0.47  | 1    | 27    | 16       | 1    | 1      | K.KESRIMMER.S + 2 Oxidation (M)                  |
| <a href="#">3996</a> | 670.8959 | 1339.7773 | 1339.7599 | 13.0  | 0    | 43    | 0.15     | 1    | 1      | R.EPEGETLVK.H                                    |
| <a href="#">4015</a> | 450.2418 | 1347.7036 | 1347.7034 | 0.17  | 0    | 44    | 0.41     | 1    | 1      | R.GYLNKPELTADK.F                                 |
| <a href="#">4016</a> | 674.8672 | 1347.7198 | 1347.7034 | 12.2  | 0    | (28)  | 14       | 2    | 1      | R.GYLNKPELTADK.F                                 |
| <a href="#">4030</a> | 676.8613 | 1351.7080 | 1351.6884 | 14.5  | 1    | 20    | 69       | 1    | 1      | K.DAYRLDTPVRL.L                                  |
| <a href="#">4043</a> | 452.9171 | 1355.7294 | 1355.7296 | -0.14 | 2    | 37    | 1.2      | 1    | 1      | K.EEEAKDPVAK.K                                   |
| <a href="#">4064</a> | 454.5854 | 1360.7345 | 1360.7351 | -0.40 | 1    | 42    | 0.46     | 1    | 1      | R.DVEGLFVLR.E                                    |
| <a href="#">4065</a> | 681.3833 | 1360.7520 | 1360.7351 | 12.5  | 1    | (40)  | 0.81     | 1    | 1      | R.DVEGLFVLR.E                                    |
| <a href="#">4122</a> | 688.8716 | 1375.7287 | 1375.7095 | 13.9  | 0    | 37    | 2.3      | 1    | 1      | R.GYLNRPDLTABK.F                                 |
| <a href="#">4128</a> | 690.3536 | 1378.6927 | 1378.6728 | 14.4  | 0    | (54)  | 0.038    | 1    | 1      | R.GYLNGLTABK.F                                   |
| <a href="#">4131</a> | 690.8448 | 1379.6791 | 1379.6568 | 13.3  | 0    | 72    | 0.00062  | 1    | 1      | R.GYLNGLTABK.F + Deamidated (NQ)                 |
| <a href="#">4141</a> | 461.5703 | 1381.6891 | 1381.6911 | -1.47 | 1    | 24    | 32       | 1    | 1      | K.QMLRFNDTK.I + Oxidation (M)                    |
| <a href="#">4165</a> | 693.3489 | 1384.6833 | 1384.6656 | 12.8  | 0    | 45    | 0.21     | 1    | 1      | K.AINSTVYMDR.LY + Oxidation (M)                  |
| <a href="#">4166</a> | 693.8421 | 1385.6696 | 1385.6497 | 14.4  | 0    | (45)  | 0.21     | 1    | 1      | K.AINSTVYMDR.LY + Oxidation (M); Deamidated (NQ) |
| <a href="#">4160</a> | 463.2790 | 1386.8151 | 1386.8156 | -0.34 | 0    | (40)  | 0.28     | 1    | 1      | R.SVEIVGILGILK.A + Oxidation (M)                 |
| <a href="#">4161</a> | 694.4244 | 1386.8343 | 1386.8156 | 13.5  | 0    | 55    | 0.0093   | 1    | 1      | R.SVEIVGILGILK.A + Oxidation (M)                 |
| <a href="#">4165</a> | 695.4091 | 1388.8037 | 1388.7850 | 13.5  | 0    | 73    | 0.00017  | 1    | 1      | K.MVGLFNTLPLR.I + Oxidation (M)                  |
| <a href="#">4170</a> | 696.3595 | 1390.7044 | 1390.6881 | 11.7  | 0    | 31    | 8.1      | 1    | 1      | K.GHLFEPNDTK.T                                   |
| <a href="#">4189</a> | 698.8337 | 1395.6529 | 1395.6340 | 13.6  | 0    | 66    | 0.0017   | 1    | 1      | R.GYMNQPALTEK.F + Oxidation (M)                  |
| <a href="#">4195</a> | 466.9365 | 1397.7876 | 1397.7878 | -0.10 | 1    | 34    | 1.8      | 1    | 1      | R.ELGEEAQLR.H                                    |
| <a href="#">4216</a> | 704.3520 | 1406.7695 | 1406.7513 | 12.9  | 0    | 39    | 0.74     | 1    | 1      | R.SLDMVGMGLVLA + 2 Oxidation (M)                 |
| <a href="#">4223</a> | 706.8906 | 1411.7666 | 1411.7493 | 12.2  | 0    | 37    | 1.1      | 1    | 1      | K.ALPEPTIGLMAR.E + Oxidation (M)                 |
| <a href="#">4228</a> | 471.5415 | 1412.8028 | 1412.8027 | 0.03  | 0    | 49    | 0.07     | 1    | 1      | K.KPLGLEAVQPK.Q                                  |
| <a href="#">4236</a> | 708.8799 | 1415.7373 | 1415.7197 | 12.4  | 0    | 52    | 0.069    | 1    | 1      | R.WLPGNIFLGR.A                                   |
| <a href="#">4237</a> | 708.9174 | 1         |           |       |      |       |          |      |        |                                                  |

|      |           |           |           |       |   |      |          |   |                                                        |
|------|-----------|-----------|-----------|-------|---|------|----------|---|--------------------------------------------------------|
| 4245 | 473.9249  | 1418.7529 | 1418.7513 | 1.11  | 0 | 44   | 0.4      | 1 | R.SPELVQVMSILKA + 2 Oxidation (M)                      |
| 4257 | 357.9615  | 1427.7769 | 1427.7772 | -0.20 | 1 | (26) | 20       | 1 | K.KKELAEHLGQYK.D                                       |
| 4258 | 476.9331  | 1427.7775 | 1427.7772 | 0.20  | 1 | 39   | 0.96     | 1 | K.KKELAEHLGQYK.D                                       |
| 4282 | 716.8448  | 1435.6750 | 1435.6554 | 13.6  | 0 | 59   | 0.008    | 1 | R.WSPDGNVEFLGR.N + Oxidation (M)                       |
| 4298 | 722.3475  | 1442.6805 | 1442.6676 | 8.82  | 0 | 35   | 2.1      | 1 | K.YGGQETVFDLTR.D                                       |
| 4302 | 361.9463  | 1443.7559 | 1443.7569 | -0.68 | 2 | (44) | 0.41     | 1 | R.EAVVVDKADKGGK.Y                                      |
| 4306 | 462.2599  | 1443.7579 | 1443.7569 | 0.71  | 2 | 53   | 0.041    | 1 | R.EAVVVDKADKGGK.Y                                      |
| 4307 | 722.8959  | 1443.7772 | 1443.7569 | 14.0  | 2 | (39) | 1.3      | 1 | R.EAVVVDKADKGGK.Y                                      |
| 4342 | 730.8848  | 1459.7550 | 1459.7347 | 13.9  | 0 | 36   | 2.8      | 1 | K.AGGAFFVDFPEYK.E                                      |
| 4344 | 487.6084  | 1459.8034 | 1459.8035 | -0.07 | 0 | (51) | 0.059    | 1 | R.TSFEINQKPVQK.I                                       |
| 4347 | 730.9181  | 1459.8216 | 1459.8035 | 12.4  | 0 | 58   | 0.0059   | 1 | R.TSFEINQKPVQK.I                                       |
| 4348 | 487.9372  | 1460.7887 | 1460.7875 | 1.49  | 0 | (25) | 29       | 1 | R.TSFEINQKPVQK.I + Deamidated (NQ)                     |
| 4359 | 489.2826  | 1464.8259 | 1464.8262 | -0.22 | 0 | (30) | 3.9      | 1 | R.SLEMVGVFSILKA + Oxidation (M)                        |
| 4361 | 733.4305  | 1464.8464 | 1464.8262 | 13.8  | 0 | 44   | 0.081    | 1 | R.SLEMVGVFSILKA + Oxidation (M)                        |
| 4371 | 735.4102  | 1468.8058 | 1468.7885 | 11.7  | 0 | 61   | 0.0045   | 1 | K.SLPNLEGVNTNAY.Y                                      |
| 4373 | 491.2484  | 1470.7233 | 1470.7215 | 1.20  | 0 | (43) | 0.39     | 1 | R.TSFHSINQVQVGR.V                                      |
| 4374 | 736.3789  | 1470.7433 | 1470.7215 | 14.8  | 0 | (46) | 0.2      | 1 | R.TSFHSINQVQVGR.V                                      |
| 4377 | 491.5762  | 1471.7067 | 1471.7066 | 0.77  | 0 | 63   | 0.0034   | 1 | R.TSFHSINQVQVGR.V + Deamidated (NQ)                    |
| 4379 | 491.5964  | 1471.7673 | 1471.7671 | 0.13  | 0 | 27   | 19       | 1 | K.THQFLTEQVEK.T                                        |
| 4382 | 492.2734  | 1473.7983 | 1473.7980 | 0.22  | 0 | (24) | 37       | 1 | K.NVNLHFTFEK.T                                         |
| 4383 | 737.9195  | 1473.8165 | 1473.7980 | 12.6  | 0 | 25   | 22       | 1 | K.NVNLHFTFEK.T                                         |
| 4410 | 498.2805  | 1491.8196 | 1491.8198 | -0.09 | 0 | 24   | 23       | 1 | K.LAEVHNLGVNK.I                                        |
| 4427 | 749.3801  | 1496.7456 | 1496.7260 | 13.1  | 0 | (40) | 0.8      | 1 | R.TSFYSLNQEVPVGR.V                                     |
| 4428 | 749.8728  | 1497.7310 | 1497.7100 | 14.1  | 0 | 59   | 0.0096   | 1 | R.TSFYSLNQEVPVGR.V + Deamidated (NQ)                   |
| 4446 | 784.9390  | 1507.8554 | 1507.8358 | 13.0  | 0 | (41) | 0.27     | 1 | K.GVQPDNVGLLVER.S                                      |
| 4447 | 503.6258  | 1507.8556 | 1507.8358 | 13.1  | 0 | 64   | 0.0015   | 1 | K.GVQPDNVGLLVER.S                                      |
| 4497 | 381.4523  | 1521.7801 | 1521.7787 | 0.92  | 1 | 26   | 25       | 1 | K.TPHVAIDEREK.L                                        |
| 4526 | 767.8821  | 1533.7497 | 1533.7380 | 14.2  | 0 | 32   | 5.7      | 1 | K.GVQPNMSVQVMDR.S + 2 Oxidation (M)                    |
| 4534 | 769.4031  | 1536.7916 | 1536.7719 | 12.8  | 0 | (28) | 14       | 1 | K.GVTPNHPVAMTER.S + Oxidation (M)                      |
| 4535 | 513.2717  | 1536.7934 | 1536.7719 | 14.0  | 0 | 35   | 3.3      | 1 | K.GVTPNHPVAMTER.S + Oxidation (M)                      |
| 4542 | 514.2955  | 1539.8648 | 1539.8443 | 13.3  | 1 | 53   | 0.021    | 1 | R.KALPEPTGIQLMAR.E + Oxidation (M)                     |
| 4543 | 770.9398  | 1539.8650 | 1539.8443 | 13.4  | 1 | (25) | 14       | 1 | R.KALPEPTGIQLMAR.E + Oxidation (M)                     |
| 4584 | 516.6028  | 1546.7867 | 1546.7867 | 12.9  | 0 | 22   | 73       | 1 | K.IFHLFEEQVEK.T                                        |
| 4575 | 518.2587  | 1551.7942 | 1551.7338 | 13.2  | 1 | 66   | 0.002    | 1 | K.LSDIDMLSEEEK.Q + Oxidation (M)                       |
| 4576 | 776.8846  | 1551.7946 | 1551.7338 | 13.4  | 1 | (40) | 0.91     | 1 | K.LSDIDMLSEEEK.Q + Oxidation (M)                       |
| 4608 | 789.3890  | 1576.7634 | 1576.7403 | 14.7  | 0 | 49   | 0.13     | 1 | K.ESEVMVVDNNGQK.A + Oxidation (M)                      |
| 4613 | 526.9782  | 1577.9126 | 1577.8930 | 12.5  | 1 | 48   | 0.033    | 1 | R.FAFDKVLTQGLLR.I                                      |
| 4614 | 789.9605  | 1577.9165 | 1577.8930 | 14.9  | 1 | (29) | 2.9      | 1 | R.FAFDKVLTQGLLR.I                                      |
| 4658 | 796.4027  | 1594.7909 | 1594.7739 | 10.6  | 0 | 66   | 0.0025   | 1 | K.AANNITTYEPAQRF.F                                     |
| 4659 | 532.6054  | 1594.7944 | 1594.7739 | 12.8  | 0 | (53) | 0.054    | 1 | K.AANNITTYEPAQRF.F                                     |
| 4664 | 533.3085  | 1596.9038 | 1596.8835 | 12.7  | 1 | 44   | 0.17     | 1 | R.KSLPNLEGVNTNAY.Y                                     |
| 4665 | 799.4597  | 1596.9049 | 1596.8835 | 12.4  | 1 | (24) | 16       | 1 | R.KSLPNLEGVNTNAY.Y                                     |
| 4666 | 533.6420  | 1597.9043 | 1597.8828 | 13.5  | 1 | 27   | 9.5      | 1 | K.LEEWKVLGLGR.V                                        |
| 4682 | 803.4597  | 1604.9048 | 1604.8814 | 14.6  | 0 | 24   | 18       | 1 | R.ENIEVLFVFAFK.F                                       |
| 4750 | 824.4314  | 1646.8482 | 1646.8264 | 13.3  | 0 | 47   | 0.23     | 1 | K.YSGQDQVYDPIAGR.S                                     |
| 4768 | 561.9894  | 1652.9463 | 1652.9250 | 12.9  | 0 | 43   | 0.18     | 1 | K.TVEGLAQHFQVKA                                        |
| 4769 | 827.4809  | 1652.9472 | 1652.9250 | 13.5  | 0 | (21) | 28       | 1 | K.TVEGLAQHFQVKA                                        |
| 4800 | 557.6613  | 1668.9621 | 1668.9403 | 13.1  | 1 | 37   | 0.74     | 1 | K.EKKPLGLEAVGYK.Q                                      |
| 4806 | 838.4467  | 1674.8789 | 1674.8577 | 12.7  | 0 | 61   | 0.0094   | 1 | K.YSGQEEVYDPIAGR.S                                     |
| 4818 | 843.4239  | 1684.8333 | 1684.8131 | 12.0  | 0 | 35   | 2.7      | 1 | R.SGTAYNLQVQVMDGK.L + Oxidation (M)                    |
| 4822 | 564.2823  | 1688.8250 | 1688.8032 | 12.9  | 0 | 60   | 0.011    | 1 | K.EHLMNYDQSVTLPKK + Oxidation (M)                      |
| 4823 | 845.9199  | 1688.8253 | 1688.8032 | 13.1  | 0 | (59) | 0.013    | 1 | K.EHLMNYDQSVTLPKK + Oxidation (M)                      |
| 4830 | 851.4553  | 1700.8961 | 1700.8733 | 13.4  | 0 | 34   | 4.4      | 1 | K.ELGELVGNALPELR.I                                     |
| 4843 | 852.4337  | 1702.8529 | 1702.8315 | 12.6  | 0 | 26   | 26       | 1 | K.AGGAFFVDFPEYK.E                                      |
| 4846 | 852.4634  | 1702.9123 | 1702.8890 | 13.7  | 0 | 36   | 2.6      | 1 | K.YSGQEDVYDPIAGR.S                                     |
| 4847 | 852.8243  | 1703.8341 | 1703.8158 | 10.9  | 0 | 39   | 1.4      | 1 | K.AGGAFFVDFPEYK.E                                      |
| 4867 | 572.9962  | 1715.9668 | 1715.9458 | 12.3  | 1 | 44   | 0.2      | 1 | R.VYRIEGETLTKH                                         |
| 4900 | 868.4647  | 1734.9148 | 1734.8927 | 12.7  | 0 | 43   | 0.49     | 1 | R.ELGEEISALEYEK.I                                      |
| 4906 | 584.6236  | 1750.8490 | 1750.8261 | 13.1  | 1 | (20) | 1.1e+002 | 1 | K.VFQTEKEEENK.I                                        |
| 4907 | 876.4320  | 1750.8493 | 1750.8261 | 13.3  | 1 | 21   | 82       | 1 | K.VFQTEKEEENK.I                                        |
| 4925 | 588.0098  | 1761.0079 | 1760.9825 | 14.2  | 1 | 44   | 0.13     | 1 | K.RENIEVLFVFAFK.F                                      |
| 4926 | 882.4436  | 1762.8724 | 1762.8526 | 11.2  | 0 | 21   | 89       | 1 | K.AGGAFFVDFPEYK.E                                      |
| 4928 | 589.0113  | 1764.0120 | 1763.9884 | 12.8  | 1 | 37   | 0.5      | 1 | R.GVQPDNVGLLVER.S                                      |
| 4933 | 884.4574  | 1766.9022 | 1766.8839 | 9.28  | 1 | 61   | 0.0079   | 1 | R.LNEDTDFKFLANK.Q                                      |
| 4934 | 589.9762  | 1766.9068 | 1766.8839 | 13.9  | 1 | (26) | 27       | 1 | R.LNEDTDFKFLANK.Q                                      |
| 4953 | 557.6425  | 1789.9055 | 1789.8815 | 12.4  | 1 | 21   | 88       | 1 | R.GVQPNMSVQVMDR.S + 2 Oxidation (M)                    |
| 4957 | 886.9338  | 1791.8831 | 1791.8315 | 12.0  | 0 | 81   | 7.2e-005 | 1 | R.VLYFDNATYATK.I                                       |
| 4982 | 449.4845  | 1793.9090 | 1793.9094 | -0.22 | 1 | 22   | 76       | 1 | R.EGVTPNHPVAMTER.S + Oxidation (M)                     |
| 4976 | 602.3168  | 1803.9087 | 1803.9087 | 13.9  | 1 | 54   | 0.046    | 1 | K.VRESVMVVDNNGQK.A + Oxidation (M)                     |
| 4989 | 604.6679  | 1810.9817 | 1810.9577 | 13.2  | 0 | 50   | 0.084    | 1 | K.HITAGEGLVYNEFK.R                                     |
| 5007 | 913.9525  | 1825.8903 | 1825.8669 | 12.8  | 0 | 29   | 13       | 2 | R.NPLFDITFVLGNTDRK.S + Oxidation (M)                   |
| 5020 | 920.9493  | 1839.8840 | 1839.8673 | 9.09  | 1 | 27   | 18       | 1 | R.SDQSEYVYGRVDEQV.V + Oxidation (M)                    |
| 5052 | 626.0102  | 1875.0087 | 1874.9850 | 12.7  | 2 | 47   | 0.2      | 1 | K.ETGRDVEGLDFVVKR.E                                    |
| 5087 | 959.9955  | 1917.3764 | 1917.3513 | 13.1  | 0 | 35   | 4        | 1 | R.GGYSVGLVDFVYVK.G                                     |
| 5091 | 642.9592  | 1925.8557 | 1925.8326 | 12.0  | 0 | 52   | 0.033    | 1 | K.YNGYGAHNSMLGGGLER.N + Oxidation (M)                  |
| 5092 | 643.2883  | 1926.8430 | 1926.8166 | 13.7  | 0 | (26) | 9.9      | 1 | K.YNGYGAHNSMLGGGLER.N + Oxidation (M); Deamidated (NQ) |
| 5101 | 484.9942  | 1935.9476 | 1935.9425 | 2.62  | 2 | (42) | 0.72     | 1 | K.GVFEQTEKEEENK.I                                      |
| 5102 | 646.3296  | 1935.9689 | 1935.9425 | 12.6  | 2 | 52   | 0.081    | 1 | K.GVFEQTEKEEENK.I                                      |
| 5128 | 977.9995  | 1953.9845 | 1953.9619 | 11.6  | 1 | (27) | 27       | 2 | R.NPLFDITFVLGNTDRK.S + Oxidation (M)                   |
| 5127 | 652.3359  | 1953.9858 | 1953.9619 | 12.3  | 1 | 51   | 0.1      | 1 | R.NPLFDITFVLGNTDRK.S + Oxidation (M)                   |
| 5137 | 656.7017  | 1967.0832 | 1967.0588 | 12.4  | 1 | 58   | 0.0085   | 1 | K.HITAGEGLVYNEFK.R                                     |
| 5138 | 656.7021  | 1967.0846 | 1967.0588 | 14.1  | 1 | (51) | 0.048    | 1 | K.HITAGEGLVYNEFK.R                                     |
| 5149 | 990.6215  | 1979.0284 | 1979.0000 | 13.4  | 0 | 29   | 16       | 1 | K.SFEVEGITTFVYNSR.H                                    |
| 5154 | 663.0142  | 1986.0208 | 1985.9959 | 12.5  | 1 | 40   | 1.4      | 1 | U K.TPHVAIVGWQDGLTYR.E                                 |
| 5182 | 664.6436  | 1990.9090 | 1990.8839 | 12.6  | 0 | 40   | 0.67     | 1 | K.MFEPNTDITVYVLR.D + 3 Oxidation (M)                   |
| 5172 | 665.6619  | 1993.9640 | 1993.9390 | 12.5  | 0 | 30   | 12       | 1 | K.GVMEHSGYVYVMAWK.D + 2 Oxidation (M)                  |
| 5187 | 503.5175  | 2010.0409 | 2010.0170 | 11.9  | 2 | 52   | 0.074    | 1 | R.SRLNEDTDFKFLANK.Q                                    |
| 5188 | 671.0221  | 2010.0444 | 2010.0170 | 13.6  | 2 | (50) | 0.11     | 1 | R.SRLNEDTDFKFLANK.Q                                    |
| 5195 | 505.5160  | 2018.0347 | 2018.0109 | 11.8  | 1 | 56   | 0.033    | 1 | K.TPEHVAIVFEDEKVTYR.E                                  |
| 5196 | 673.6857  | 2018.0352 | 2018.0109 | 12.0  | 1 | (44) | 0.49     | 1 | K.TPEHVAIVFEDEKVTYR.E                                  |
| 5209 | 677.6721  | 2029.9944 | 2029.9700 | 12.0  | 0 | 23   | 62       | 1 | R.SYIMEDSGAALLTQGLK.L + 2 Oxidation (M)                |
| 5227 | 1025.0204 | 2048.0252 | 2047.9998 | 12.9  | 0 | 41   | 1.1      | 1 | K.IYEVNQEVMVNVFK.H + 2 Oxidation (M)                   |
| 5245 | 692.0351  | 2073.0835 | 2073.0565 | 13.0  | 0 | 63   | 0.0061   | 1 | R.SHADVENIVQMFVNTLAK.N + Oxidation (M)                 |
| 5246 | 1037.5508 | 2073.0870 | 2073.0565 | 14.7  | 0 | (61) | 0.0094   | 1 | R.SHADVENIVQMFVNTLAK.N + Oxidation (M)                 |
| 5282 | 702.3604  | 2104.0594 | 2104.0333 | 12.4  | 1 | (36) | 3.3      | 1 | R.LSPMGEQMLFHALLDK.N + 2 Oxidation (M)                 |
| 5283 | 527.0226  | 2104.0612 | 2104.0333 | 13.3  | 1 | 44   | 0.54     | 1 | R.LSPMGEQMLFHALLDK.N + 2 Oxidation (M)                 |
| 5288 | 703.3815  | 2107.1226 | 2107.0960 | 13.1  | 1 | 47   | 0.19     | 1 | R.KSFEVEGITTFVYNSR.H                                   |
| 5294 | 704.7084  | 2111.1035 | 2111.0786 | 11.8  | 1 | 30   | 12       | 1 | R.GYRELGEISALEYEK.I                                    |
| 5298 | 707.7203  | 2120.1390 | 2120.1153 | 11.2  | 0 | 42   | 0.52     | 1 | R.LLFEAPTIGEISNYGAK.K                                  |
| 5301 | 1061.5708 | 2121.1270 | 2121.0993 | 13.1  | 0 | (25) | 31       | 1 | R.LLFEAPTIGEISNYGAK.K + Deamidated (NQ)                |
| 5371 | 722.7258  | 2165.1555 | 2165.1256 | 13.8  | 0 | 40   | 1        | 1 | U K.VLFEPTISALAGYADGGK.G + Deamidated (NQ)             |
| 5376 | 542.7793  | 2167.0722 | 2167.0408 | 14.5  | 1 | 23   | 66       | 1 | R.YWKEHLMNYDQSVTLPKK + Oxidation (M)                   |
| 5392 | 727.3632  | 2179.0678 | 2179.0402 | 12.7  | 0 | 66   | 0.0035   | 1 | R.SHTDENIVQMFVNTLAMR.N + 2 Oxidation (M)               |
| 5615 | 784.3874  | 2360.1403 | 2360.1117 | 12.0  | 0 | 29   | 19       | 1 | K.QTALHAYENPDTFFDVLVEK.L                               |
| 5683 | 809.4171  | 2425.2295 | 2425.2060 | 9.69  | 2 | 26   | 42       | 1 | R.DLSRNPFDITFVLGNTDRK.S + Oxidation (M)                |
| 5684 | 607.3164  | 2425.2363 | 2425.2060 | 12.5  | 2 | (24) | 66       | 1 | R.DLSRNPFDITFVLGNTDRK.S + Oxidation (M)                |
| 5716 | 825.4072  | 2473.1997 | 2473.1721 | 11.2  | 0 | 65   | 0.0047   | 1 | R.VHGNVLEQIYSESTEDQVER.I                               |
| 5728 | 838.0582  | 2511.1527 | 2511.1224 | 12.1  | 0 | 69   | 0.0011   | 1 | U K.IHEEVDFMYSQVSNSEQVEK.M + Oxidation (M)             |
| 5729 | 847.4349  | 2539.2828 | 2539.2482 | 13.6  | 0 | 33   | 8.2      | 1 | K.ESYVAIQPVFEYYPVSSVQK.R                               |
| 5764 | 852.1237  | 2553.3493 | 2553.3148 | 12.5  | 0 | 26   | 31       | 1 | K.QNLDHMLVENYPLVEELQK.N + Oxidation (M)                |
| 5796 | 648.3552  | 2589.3918 | 2589.3591 | 13.6  | 1 | (28) | 16       | 1 | R.GYLNKPELTADKFAVFPVGR.M                               |
| 5797 | 864.1384  | 2589.3935 | 2589.3591 | 13.3  | 1 | 28   | 14       | 1 | R.GYLNKPELTADKFAVFPVGR.M                               |
| 5845 | 660.8363  | 2639.3161 | 2639.2798 | 13.8  | 0 | 22   | 1.2e+002 | 1 | U R.YLFLDMRHHISQVSMQITK.E + 3 Oxidation                |



|                      |           |           |           |      |   |    |    |   |                                   |
|----------------------|-----------|-----------|-----------|------|---|----|----|---|-----------------------------------|
| <a href="#">6104</a> | 836.4302  | 3341.6916 | 3341.6469 | 13.4 | 0 | 30 | 17 | 1 | K.TVHQNVLFSQQHEYPFLYEIQNHTELK.Q   |
| <a href="#">6116</a> | 1154.2594 | 3459.7564 | 3459.7095 | 13.6 | 0 | 27 | 41 | 1 | K.VLQYTTCSFDVCYQEIFSTLLSGGQLYLR.K |

2. [gi|58845359](#) Mass: 508362 Score: 6964 Matches: 226(41) Sequences: 174(36) emPAI 1.54  
 RecName: Full=Gramicidin S synthase 2; AltName: Full=Gramicidin S synthase II; Includes: RecName: Full=ATP-dependent proline adenylyase; Short=ProA; AltName: Full=Proline activase; Includes: RecName: Full=ATP-dependent valine adenylyase; Short=ValA; A
3. [gi|545381984](#) Mass: 134825 Score: 250 Matches: 6(1) Sequences: 6(1) emPAI 0.13  
 DNA-directed RNA polymerase, beta' subunit [Aneurinibacillus aneurinilyticus]

**Figure S5. MASCOT report for MS/MS analysis of excised gel bands from *A. migulanus* DSM 5759 proteome.**

1 MSTFK**KEHVQ** DMYRLSPMQE GMLFHALLDK DKN~~NAHLVQMS~~ IAIEGIVDVE  
51 LLES~~LNILI~~ DR**YDVFR**TTF LHEKIKQPLQ VVLKERPVQL QFKDISSLDE  
101 EKREQAIEQY KYQDGETVFD LTRDPLMRVA IFQTGKVNYQ MIWSFHILM  
151 DGWCFNIIFN DLFNIYLSLK EKKPLQLEAV QPYKQFIKWL EKQDKQEALR  
201 YWKEHLMNYD QSVTLPKKA AINNTTYEPA QFRFAFDKVL TQQLLRANQ  
251 SQVTLNIVFQ TIWGIVLQKY NSTNHVVYGS VVSGRPSEIS GIEK**MVGLFI**  
301 NTLPLRIQTQ KDQSFIELVK TVHQNVLFSQ QHEYFPLYEI QNHTELKQNL  
351 IDHIMVIENY PLVEELQKNS IMQKVGFVTR DVK**MFEPTNY** DMTVMVLPDR  
401 EISVRLDYNA AVYDIDFIKK IEGHMKEVAL CVANNPHVLV QDVPLLTQKE  
451 KQHLLVELHD SITEYDPKTI HQLFTEQVEK TPEHVAVVFE DEKVTYRELH  
501 ERSNQLARFL REKGVK**KESI** IGIMMERSVE MIVGILGILK AGGAFVPIDP  
551 EYPKERIGYM LDSVRLVLTQ RHLKDKFAFT KETIVIEDPS ISHELTEEID  
601 YINESEDLFY IYTS~~GTGK~~ PKGVMLEHKN IVNLLHFTFE KTNINFSDKV  
651 LQYTTCSFDV CYQEIFSTLL SGGQLYLIRK ETQRDVEQLF DLVKRENIEV  
701 LSPFVAFLEK IFNEREFINR FPTCVKHIIT AGEQLVVNNE FKRYLHEHNV  
751 HLHNHYGPSE THVVTTYTIN PEAEIPELPP IGKPISTWI YILDQEQQLQ  
801 PQGIVGELYI SGANVGR**GYL** NNQELTAEKF FADPFRPNER MYRTGDLAR**W**  
851 LPDGNIEFLG RADHQVKIRG HRIELGEIEA QLLNCKGVKE AVVIDKADDK  
901 GGKYLCAVVV MEVEVNDSEL REYLGKALPD YMIPSFVPL DQLPLTPNGK  
951 IDR**KSLPNLE** GIVNTNAKYV VPTNELEEK AKIWEEVLGI SQIGIQDNFF  
1001 SLGGHSLKAI TLISRMNKEC NVDIPLRLLF EAPTIQEISN YINGAKKESY  
1051 VAIQPVPEQE YYPVSSVQKR MFILNEFDRS GTAYNLPGVM FLDGKLNRYRQ  
1101 LEAAVKKLVE RHEALR**TSFH** SINGEPVQRV HQNVELQIAY SESTEDQVER  
1151 IIAEFMQPFA LEVRPLLRVG LVKLEAERHL FIMDMHHIIS DGVSMQIMIQ  
1201 EIADLYK**EKE** LPTLGIQYKD FTVWHNRLQ SDVIEKQEAY WLNVFTEEIP  
1251 VLNLPTDYPR PTIQSFDGKR FTFSTGKQLM DDLYKVATET GTTLYMVLLA  
1301 AYNVFLSK**YS** GQDDIVVGTG IAGRSHADVE NMLGMFVNTL AIR**SRLNED**  
1351 TFKDFLANVK QTALHAYENP DYPFDLVEK LGIQR**DLSRN** PLFDTMFVLQ  
1401 NTDRKSFEVE QITITPYVPN SRHSKFDLTL EVSEEQNEIL LCLEYCTKLF  
1451 TDKTVERMAG HFLQILHAIV GNPTIISEI EILSEEEK**QH** ILFEFNDTKT  
1501 TYPHMQTIQG LFEEQVEK**TP** DHVAVGWKQD TLYRELNERN ANQVARVLRQ  
1551 KGVQPDNIVG LLVERSEML VGIMGILKAG GAYLPLDPEY PADRISYMIQ  
1601 DCGVRIMLTQ QHLLSLVHDE FDCVILDEDS LYKGDSSNLA PVNQAGDLAY  
1651 IMYTSGSTGK PKGVMVEHRN VIRLVK**NTNY** VQVREDDRII QTGAIGFDAL  
1701 TFEVFGSLLH GAELYPVTKD VLLDAEKLHK FLQANQITIM WLTSPLFNQL  
1751 SQGTEEMFAG LR**SLIVGGDA** LSPKHINNPK RKCPLNTMWN GYGPTENTTF  
1801 STCFLIDK**EY** DDNIPIGKAI SNSTVYIMDR YGQLQPVGVP GELCVGGDGV  
1851 AR**GYMNQPAL** TEEKFVPPNF APGERMYRTG DLAR**WLPDGT** IEYLGRIDQQ  
1901 VKIR**GYRIEP** GEIETLLVKH KVKESVIMV VEDNNGQKAL CAYYVPEEEV  
1951 TVSELREYIA KELPVYMVPA YFVQIEQMPL TQNGKVN**SA** LPKPDGEFGT  
2001 ATEYVAPSSD IEMKLAIEIWH NVLGVNKIGV LDNFFELGGH SLRAMTMISQ  
2051 VHKEFDVELP LKVLFETPTI SALAQYIADG QKGMYLAIQP VTPTDYYPVS  
2101 SAQKR**MYILY** EFEGAGITYN VPNVMFIEGK LDYQRFEYAI KSLVNRHEAL  
2151 RTSFYSLNGE PVQRVHQNVE LQIAYSEAKE DEIEQIVESF VQPFDEIAP  
2201 LLRVGLVKLA SDR**YFLMDM** HHIISDGVSM QIITKEIADL YK**GKELAE**LH  
2251 IQYKDFAVWQ NEWFQSDALE KQKTYWLNTF AEDIPVLNLS TDYPRPTIQS

2301 FEGDIVTFSFA GK**QLAEELKR** LAETGTTLY MLLLAAYNVL LHK**YSGQEEI**  
 2351 **VVGTPIAGRS HADVENIVGM FVNTLALKNT** PIAVR**TFHEF LLEV**KQNALE  
 2401 AFENQDYPFE NLIEKLQVRR DLSRNPLFDT MFSLSNIDEQ VEIGIEGLNF  
 2451 SPYEMQYWIA KFDISFDILE KQDDIQFYFN YCTNLFKKET IERLATHFMH  
 2501 ILQEIVINPE IKLCEINMLS EEEQQR**VLYD FNGT**DATYAT **NKIFHEL**FEE  
 2551 **QVEKTPDHIA VIDEREKLSY QELNAKANQL** ARVLR**QKGVQ PNSMVGIMVD**  
 2601 **RSLDMIVGML GVLKAGGAYV PIDIDYPQER** ISYMMEDSGA ALLLT**QK**KL  
 2651 QQIAFSGDIL YLDQEEWLHE EASNLEPIAR PHYIAYIYT SGTTG**KPKGV**  
 2701 **MIEHQSYVNV AMAWKDAYRL DTFPVR**LLQM ASF<sup>2</sup>AFADVS AGDFARALLT  
 2751 GGQLIVCPNE VK**MDPASLYA IIKYDITIF** EATPALVIPL MEYIYEQKLD  
 2801 ISQLQILIVG SDSCSMEDFK TLVSR**FGSTI RIVNSYGVTE** ACIDSSYYEQ  
 2851 PLSSLHVTGT VPIGKPYANM KMYIMNQYLQ IQPVG**VIGEL CIGGAGVARG**  
 2901 **YLNRPDLTAE KFVNPFPVPG EKLYRTGDLA** R**WMPDGNVEF LGR**NDHQVKI  
 2951 RGIR**IELGEI EAQLRKHDSI KEATVIARE**D HMKEKYLCA**Y MVTEGEV**NVA  
 3001 ELRAYLANDR AAMIPSYFVS LEAMPLTANG KIDKRSLPEP DGSISIGTEY  
 3051 DRPRTMLEGK **LEEIWKDVLG LQRVGIHDDF** FTIGGHS**LKA MAVISQVHKE**  
 3101 CQTEVPLR**VL FETPTIQGLA KYIETDTEQ** YMAIQPVSGQ DYYPVSSAQK  
 3151 RMFIVNQFVG VGISYNMPSI MLIEGKLERT **RLESAFKRLI** ERHESL**RTSF**  
 3201 **EIINGKPVQK IHEEVDFNMS YQVASNEQVE** KMIDEFIQPF DLSVAP**LLRV**  
 3251 **ELLKLEEDRH VLIFDMHHII SDGISSNILM** **KELGELYQGN ALPELRIQYK**  
 3301 DFAVWQNEWF QSEAFKKQEE YWVNVFADER PILDIP**TDYP RPMQQSFDGA**  
 3351 QLTFGTG**KQL MDGLYRVATE** TGTTLYMVLL AAYNVLLSK**Y SGQEDIIVGT**  
 3401 **PIVGRSHTDL ENIVGMFVNT LAMR**NKPEGE KTFKAFVSEI KQNALAAFEN  
 3451 QDYPFEELIE KLEIQRDLSR NPLFD**TLFSL QNIGEE**SFEL AELTCKPFDL  
 3501 VSKLEHAKFD LSLVAVV**FEE EIAFGLQYCT** KLYKEK**TVEQ LAQHFIQIVK**  
 3551 **AIVENPDVKL SDIDMLSEEE KKQIMLEFND** TKIQY**TQNQT IQELFEEQVK**  
 3601 KTPEHIAIVW EGQUALI**YHEL NIKANQLARV** LR**EKGVTPNH PVAIMTERSL**  
 3651 **EMIVGIFSIL KAGGAYVPID P**AYPQ**ERIQY LLED**SGAALL LTQSHV**LNKL**  
 3701 PVDIEWLDTL DEQNYVEDGT NLPFMNQSTD LAYI**YTS**GT TGKPKG**VMIE**  
 3751 HQSIINCLQW RKEEYEF**PG DTALQVFSFA** FDGFVASLFA PILAGATSVL  
 3801 PK**EEEAKDPV ALK**KLIASEE ITHYYGVPSL FSAILDVSS **KDLQNLRCVT**  
 3851 LGGEK**LPAQI VKKIKEKNKE IEVNNEYGPT** ENSV**VTTIMR** DIQVEQ**EITI**  
 3901 GRPLSNVDVY IVNCNHQLQP VGVV**GELCIG GQGLAR**GYLN **KPELTADK**VF  
 3951 **VNPFVPGERM YKTGDLAKWR SDGMIEYVGR** VDEQ**VKVRGY RIELGEIESA**  
 4001 **ILEYEKIKEA VVMVSEHTAS EQMLCAYIVG** EEDVLTDLR SYLAK**LLPSY**  
 4051 **MIPNYFIQLD SIPLTPNGKV DRKALPEPQT** IGLMAREYVA PRNEIEAQLV  
 4101 LIWQEV**LIGIE LIGITDNFFE LGGHSLKATL** LVAKIY**EQ IEMPLNVVFK**  
 4151 HSTIMKIAEY ITHQES**NNV HQPILVNVEA DREALSLN**GE KQRK**NIELPI**  
 4201 LLNEETDRNV FLFAPIGAQ**G VFYK**KLAEQI PTASLYG**DFD IEDDDRIQ**QY  
 4251 IESMIQTQSD GQYVLIGYSS GGNLAF**EVAK EMERQGYSVS** DLV**LF**DVY**WK**  
 4301 **GKVFEQTKEE EENIKIIME ELRENPGMFN** M**TREDFEL**YF ANEFVK**QSFT**  
 4351 RKMRYMSFY TQLVNYGEVE ATIH**LQAEF EEEKIDENEK** ADEEEK**TYLE**  
 4401 EKWNEKAWNK AAKRFV**KYNG YGAHSNMLGG DGLERNSSIL** KQILQ**GTFV**V  
 4451 **K**

Figure S6. Compiled MS/MS data of gel excised fluorescent GrsB bands from *A. migulanus* DSM 5759 proteome. Peptides found are shown in red.

## Chemical Synthetic Procedures

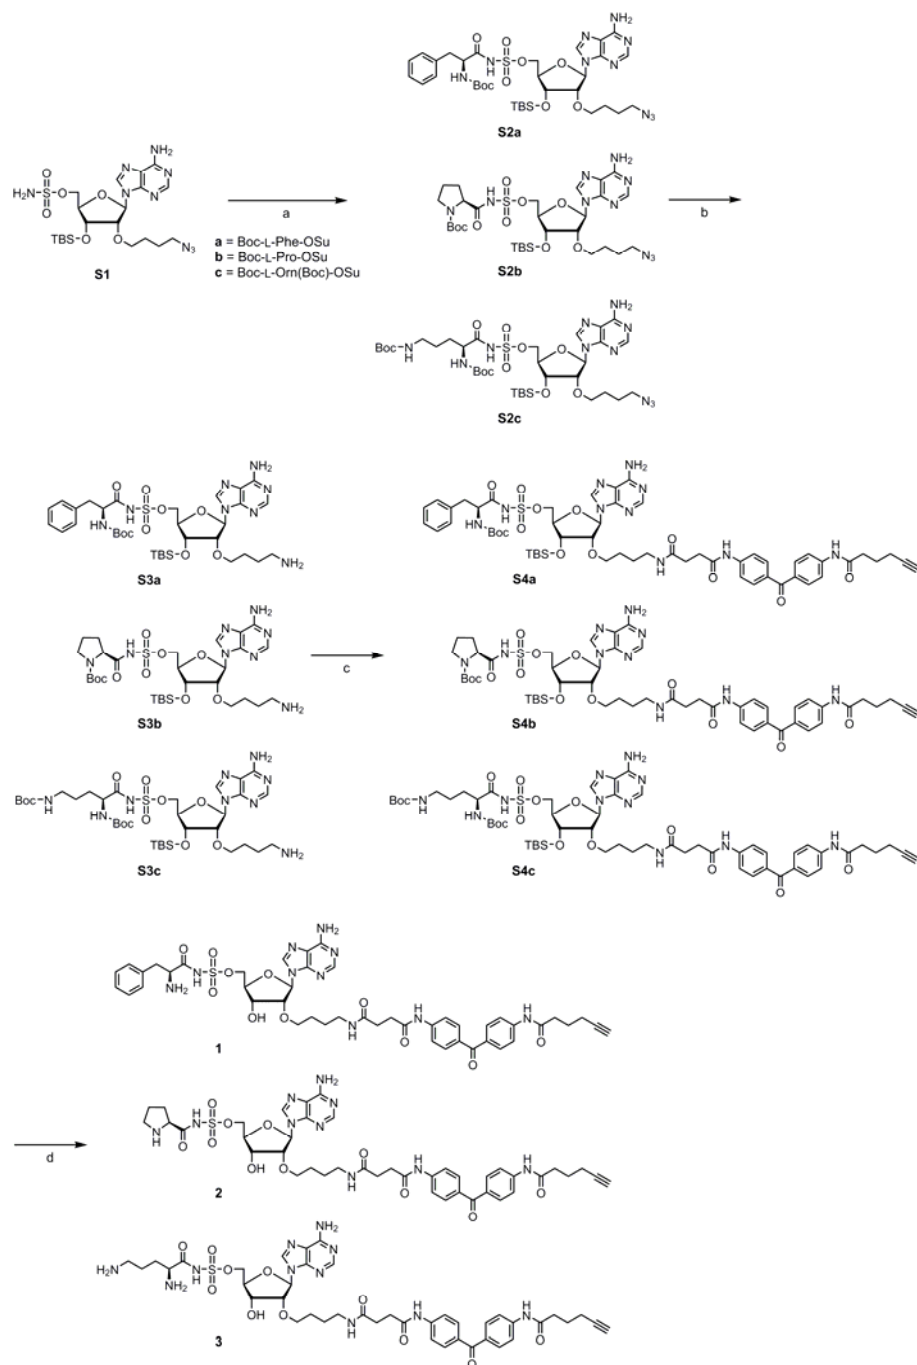

### Scheme S1. Synthetic route to L-Phe-AMS-BPyne **1**, L-Pro-AMS-BPyne **2**, and L-Orn-AMS-BPyne **3**.

*Reagents and conditions:* [a] Cs<sub>2</sub>CO<sub>3</sub>, DMF, rt: 73% (**S2b**); 83% (**S2c**); [b] Pd/C, H<sub>2</sub>, MeOH, rt: 64% (**S3b**); 67% (**S3c**); [c] **S8**, EDC, HOBT, DMF, rt: 86% (**S4a**); 50% (**S4b**); 60% (**S4c**); [d] 80% aqueous TFA, rt: 56% (**1**); 91% (**2**); 88% (**3**).

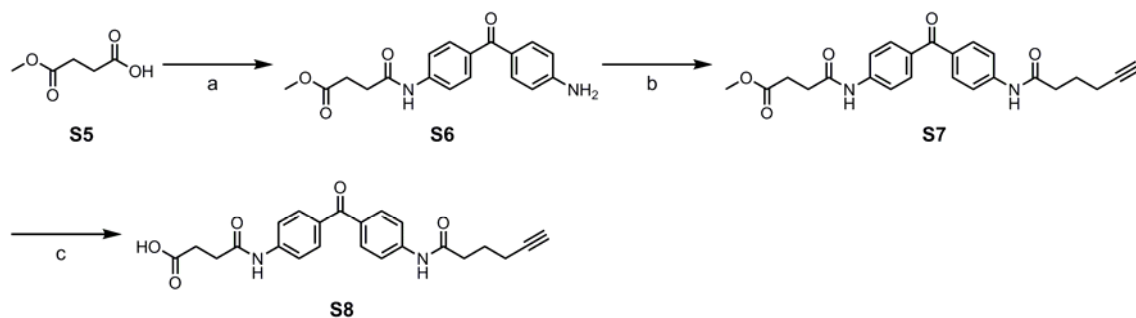

**Scheme S2. Synthetic route to S8.** Reagents and conditions: [a] 4, 4'-diaminobenzophenone, EDC, HOBT, DMF, rt, 53%; [b] 5-hexynoic chloride, DIEA, THF, rt, 51%; [c] 4 M NaOH aq., MeOH, THF, rt, 97%.

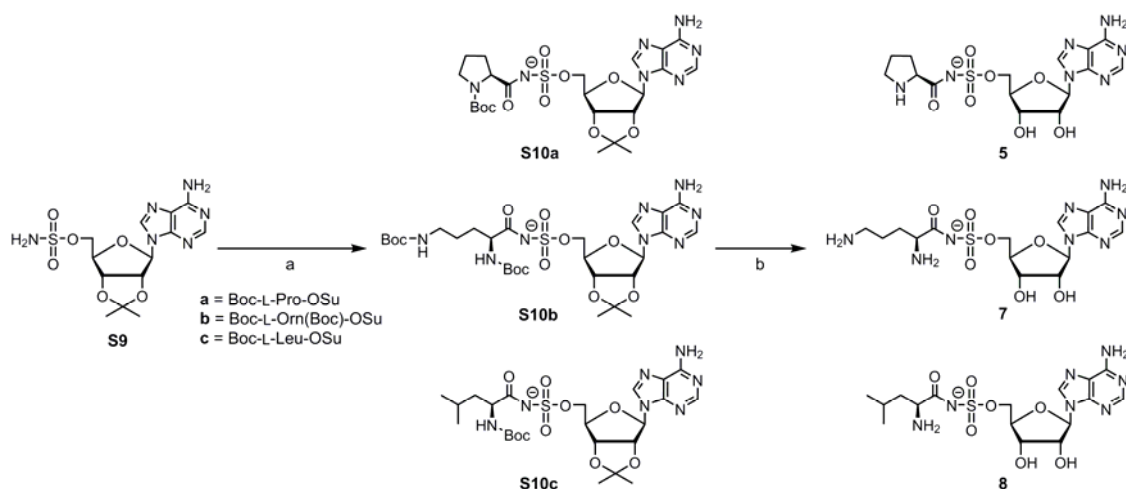

**Scheme S3. Synthetic route to 5'-O-[N-(aminoacyl)sulfamoyl]adenosines 5, 7, and 8.** Reagents and conditions: [a] *N*-hydroxysuccinimide esters a-c, Cs<sub>2</sub>CO<sub>3</sub>, DMF, rt: 87% (S10a); 22% (S10b); 61% (S10c); [b] 80% aqueous TFA, rt: 74% (5); 98% (7); 69% (8).

**General Synthetic Methods:** All commercial reagents were used as provided unless otherwise indicated. S1<sup>2</sup> (Scheme S1), S3a<sup>2</sup> (Scheme S1), S5<sup>3</sup> (Scheme S2), and 5'-O-sulfamoyl-2',3'-isopropylideneadenosine S9<sup>4</sup> (Scheme S3) are known compounds. These compounds were prepared according to published literature procedures. All reactions were carried out under an atmosphere of nitrogen in dry solvents with oven-dried glassware and constant magnetic stirring unless otherwise noted. High performance liquid chromatography (HPLC) was performed on a Prominence CBM-20A (Shimadzu) system equipped with a Prominence SPD-20A UV/VIS detector (Shimadzu). <sup>1</sup>H-NMR spectra were recorded at 500 MHz. <sup>13</sup>C-NMR spectra were recorded at 125 MHz on JEOL NMR spectrometers and standardized to the NMR solvent signal as reported by Gottlieb.<sup>5</sup> Multiplicities are given as s = singlet, d = doublet, t = triplet, q = quartet, dd = doublet of doublets, ddd = doublet of triplets, br = broad signal, m = multiplet using integration and coupling constant in Hertz. TLC analysis was performed using Silica Gel 60 F254 plates (Merck) and visualization was

accomplished with ultraviolet light ( $\lambda = 254$  nm) and/or the appropriate stain [phosphomolybdic acid, iodine, ninhydrin, and potassium permanganate]. Silica gel chromatography was carried out with SiliaFlash F60 230-400 mesh (Silicycle), according to the method of Still.<sup>6</sup> Mass spectral data were obtained using a LCMS-IT-TOF mass spectrometer (Shimadzu).

**Chemical Synthesis of 1** Compound number in bold refers to the structures shown in Scheme S1.

**((2*R*,3*R*,4*R*,5*R*)-5-(6-Amino-9*H*-purin-9-yl)-3-((*tert*-butyldimethylsilyl)oxy)-4-(4-(4-(4-(hex-5-ynamid o)benzoyl)phenyl)amino)-4-oxobutanamido)butoxy)tetrahydrofuran-2-yl)methyl ((*tert*-butoxycarbonyl)-*L*-phenylalanyl)sulfamate (S4a)**

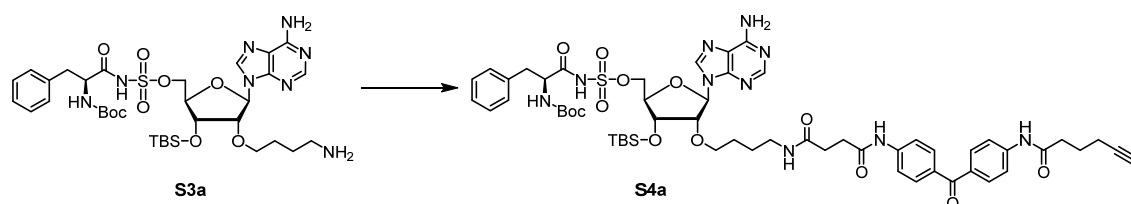

1-Ethyl-3-(3-dimethylaminopropyl) carbodiimide hydrochloride (3.1 mg, 0.016 mmol) and 1-hydroxybenzotriazole (2.5 mg, 0.016 mmol) were added to a solution of compound **S8** (6.4 mg, 0.016 mmol) in DMF (1 mL). The solution was stirred at room temperature for 10 min and **S3a** (10 mg, 0.013 mmol) was then added. After 12 h, the reaction mixture was diluted with EtOAc. The mixture was washed with 5% citric acid, 5% NaHCO<sub>3</sub>, and brine. The organic layer was dried over Na<sub>2</sub>SO<sub>4</sub> and evaporated to dryness. The residue was purified by flash chromatography (6:1 CHCl<sub>3</sub>/MeOH) to afford compound **S4a** as a white solid (13 mg, 86%).<sup>1</sup>H NMR (500 MHz, CD<sub>3</sub>OD):  $\delta$  8.48 (s, 1H), 8.19 (s, 1H), 7.75–7.70 (m, 8H), 7.23–7.17 (m, 4H), 7.15–7.09 (m, 1H), 6.14 (d,  $J = 6.3$  Hz, 1H), 4.62–4.58 (m, 1H), 4.55–4.51 (m, 1H), 4.38–4.31 (m, 1H), 4.30–4.20 (m, 3H), 3.58–3.51 (m, 1H), 3.48–3.41 (m, 1H), 3.16 (dd,  $J = 13.8, 4.6$  Hz, 1H), 3.06 (dd,  $J = 6.9, 6.3$  Hz, 2H), 2.91–2.83 (m, 1H), 2.70 (dd,  $J = 7.5, 6.9$  Hz, 2H), 2.58–2.51 (m, 4H), 2.31–2.26 (m, 3H), 1.94–1.86 (m, 2H), 1.54–1.37 (m, 4H), 1.33 (s, 9H), 0.94 (s, 9H), 0.15 (s, 3H), 0.14 (s, 3H). <sup>13</sup>C NMR (125 MHz, CD<sub>3</sub>OD):  $\delta$  196.5, 174.4, 174.0, 173.3, 157.4, 157.2, 153.9, 150.8, 144.3, 144.2, 141.3, 139.0, 134.0, 133.9, 132.3, 132.2, 130.6, 129.2, 127.4, 120.3, 120.0, 119.9, 87.5, 85.4, 84.1, 83.1, 80.2, 72.7, 71.5, 70.3, 69.6, 59.2, 40.0, 36.7, 33.2, 31.8, 28.8, 28.1, 26.9, 26.3, 25.5, 19.0, 18.6, –4.3, –4.5. (The <sup>13</sup>C signal of the sulfamoyloxy-linked carbonyl, around 180 ppm, was not observed.) HRMS (ESI+): [M+H]<sup>+</sup> calcd for C<sub>57</sub>H<sub>75</sub>N<sub>10</sub>O<sub>13</sub>SSi, 1167.5005; found, 1167.5004.

## L-Phe-AMS-BPyne (1)

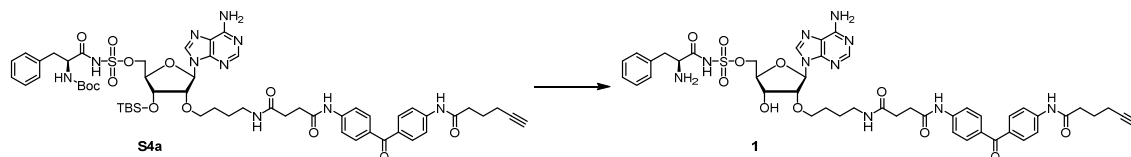

Compound **S4a** (12 mg, 0.010 mmol) was dissolved in a mixture of 4:1 (v/v) mixture of TFA and H<sub>2</sub>O at room temperature. After 8 h, the flask was placed on the rotary evaporator and the TFA and H<sub>2</sub>O were removed at reduced pressure. The residue was purified by flash chromatography (4:1 CHCl<sub>3</sub>/MeOH) to afford compound **1** as a white solid (5.3 mg, 56%). <sup>1</sup>H NMR (500 MHz, CD<sub>3</sub>OD): δ 8.50 (s, 1H), 8.19 (s, 1H), 7.76–7.71 (m, 8H), 7.31–7.26 (m, 4H), 7.21–7.15 (m, 1H), 6.16 (d, *J* = 4.6 Hz, 1H), 4.45 (dd, *J* = 4.6, 4.0 Hz, 1H), 4.41 (dd, *J* = 5.2, 4.6 Hz, 1H), 4.39–4.34 (m, 1H), 4.33–4.27 (m, 2H), 3.91–3.86 (m, 1H), 3.73–3.63 (m, 1H), 3.63–3.57 (m, 1H), 3.35–3.28 (m, 1H, overlapping with MeOH), 3.19–3.10 (m, 2H), 3.06–3.00 (m, 1H), 2.71 (dd, *J* = 7.5, 6.9 Hz, 2H), 2.59–2.52 (m, 4H), 2.32–2.26 (m, 3H), 1.94–1.87 (m, 2H), 1.66–1.44 (m, 4H). <sup>13</sup>C NMR (125 MHz, CD<sub>3</sub>OD): δ 196.6, 175.3, 174.5, 174.1, 173.3, 157.2, 154.0, 150.6, 144.3, 144.2, 141.1, 136.6, 134.0, 133.9, 132.3, 132.2, 130.6, 130.0, 128.4, 120.13, 120.07, 120.0, 87.8, 84.5, 84.1, 83.6, 71.6, 70.9, 70.3, 68.9, 58.3, 40.0, 38.7, 36.7, 33.2, 31.8, 27.8, 26.9, 25.5, 18.6. HRMS (ESI<sup>+</sup>): [M+H]<sup>+</sup> calcd for C<sub>46</sub>H<sub>53</sub>N<sub>10</sub>O<sub>11</sub>S, 953.3616; found, 953.3616.

**Chemical Synthesis of 2** Compound number in bold refers to the structures shown in Scheme S1.

***tert*-Butyl (S)-2-((((2*R*,3*R*,4*R*,5*R*)-5-(6-amino-9*H*-purin-9-yl)-4-(4-azidobutoxy)-3-((*tert*-butyldimethylsilyl)oxy)tetrahydrofuran-2-yl)methoxy)sulfonyl)carbamoyl)pyrrolidine-1-carboxylate (**S2b**)**

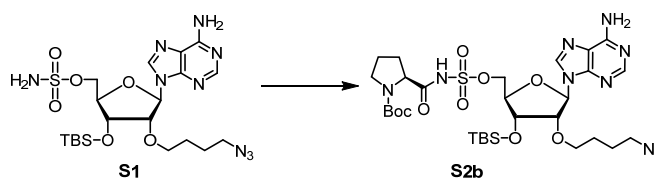

Boc-Pro-OSu (52 mg, 0.17 mmol) and cesium carbonate (108 mg, 0.33 mmol) were added to a solution of compound **S1** (60 mg, 0.11 mmol) in DMF (1 mL). The solution was stirred at room temperature for 1 h. The reaction mixture was then filtered through a pad of Celite. The filtrate was concentrated under reduced pressure. The residue was purified by flash chromatography (10:1 to 5:1 CHCl<sub>3</sub>/MeOH) to afford compound **S2b** as a white solid (61 mg, 73%). <sup>1</sup>H NMR (500 MHz, CD<sub>3</sub>OD): δ 8.46 (s, 1H), 8.22 (s, 1H), 6.15 (d, *J* = 6.3 Hz, 1H), 4.67–4.60 (m, 1H), 4.58–4.50 (m, 1H), 4.47–4.41 (m, 1H), 4.40–4.32 (m, 1H), 4.30–4.25 (m, 1H), 4.21–4.09 (m, 1H), 3.63–3.55 (m, 1H), 3.52–3.42 (m, 2H), 3.41–3.33 (m, 1H), 3.19–3.11 (m, 2H), 2.27–2.14 (m, 1H), 2.02–1.70 (m, 3H), 1.60–1.46 (m, 4H), 1.46–1.39 (m, 9H), 0.97 (s, 9H), 0.18 (s, 3H), 0.17 (s,

3H).  $^{13}\text{C}$  NMR (125 MHz,  $\text{CD}_3\text{OD}$ ):  $\delta$  178.7, 157.2, 156.1, 153.7, 150.7, 141.4, 120.3, 87.6, 85.2, 83.1, 81.4, 72.6, 71.3, 70.3, 63.0, 52.1, 47.7, 32.4, 28.7, 28.0, 26.6, 26.3, 24.5, 19.0, -4.4, -4.6. HRMS (ESI $^-$ ):  $[\text{M}-\text{H}]^-$  calcd for  $\text{C}_{30}\text{H}_{49}\text{N}_{10}\text{O}_9\text{SSi}$ , 753.3179; found, 753.3176.

***tert*-Butyl (*S*)-2-((((2*R*,3*R*,4*R*,5*R*)-5-(6-amino-9*H*-purin-9-yl)-4-(4-aminobutoxy)-3-((*tert*-butyldimethylsilyl)oxy)tetrahydrofuran-2-yl)methoxy)sulfonyl)carbamoyl)pyrrolidine-1-carboxylate (**S3b**)**

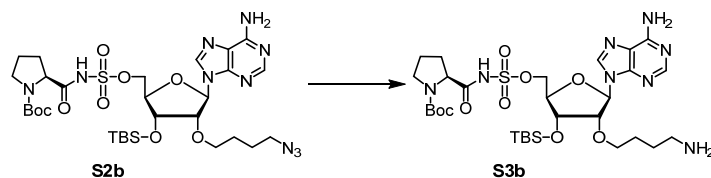

To a solution of **S2b** (50 mg, 0.066 mmol) in MeOH (2 mL) was added 10% Pd/C (5 mg). The resulting suspension was hydrogenated under an atmosphere of  $\text{H}_2$  at room temperature for 24 h. The reaction mixture was filtered through a pad of Celite, which was further washed with MeOH (10 mL). The combined filtrate was concentrated under reduced pressure. The residue was purified by flash chromatography (4:1 to 3:1  $\text{CHCl}_3/\text{MeOH}$ ) to afford compound **S3b** as a white solid (31 mg, 64%).  $^1\text{H}$  NMR (500 MHz,  $\text{CD}_3\text{OD}$ ):  $\delta$  8.54 (s, 1H), 8.20 (s, 1H), 6.17 (d,  $J = 6.9$  Hz, 1H), 4.67–4.62 (m, 1H), 4.61–4.52 (m, 1H), 4.33–4.23 (m, 3H), 4.18–4.09 (m, 1H), 3.62–3.55 (m, 1H), 3.53–3.42 (m, 2H), 3.41–3.34 (m, 1H), 2.91–2.80 (m, 2H), 2.26–2.12 (m, 1H), 2.02–1.85 (m, 2H), 1.83–1.72 (m, 1H), 1.68–1.50 (m, 4H), 1.42 (s, 9H), 0.97 (s, 9H), 0.18 (s, 3H), 0.17 (s, 3H).  $^{13}\text{C}$  NMR (125 MHz,  $\text{CD}_3\text{OD}$ ):  $\delta$  181.6, 157.4, 156.4, 154.0, 150.8, 141.2, 120.1, 87.1, 86.0, 83.4, 81.0, 73.1, 70.8, 69.1, 64.0, 47.7, 40.5, 32.7, 28.8, 27.6, 26.3, 25.4, 24.6, 19.0, -4.4, -4.5. HRMS (ESI $^-$ ):  $[\text{M}-\text{H}]^-$  calcd for  $\text{C}_{30}\text{H}_{51}\text{N}_8\text{O}_9\text{SSi}$ , 727.3274; found, 727.3271.

***tert*-Butyl (*S*)-2-((((2*R*,3*R*,4*R*,5*R*)-5-(6-amino-9*H*-purin-9-yl)-3-((*tert*-butyldimethylsilyl)oxy)-4-(4-(4-(4-(hex-5-ynamido)benzoyl)phenyl)amino)-4-oxobutanamido)butoxy)tetrahydrofuran-2-yl)methoxy)sulfonyl)carbamoyl)pyrrolidine-1-carboxylate (**S4b**)**

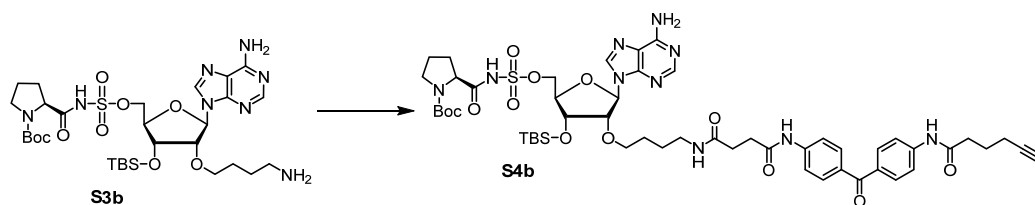

1-Ethyl-3-(3-dimethylaminopropyl) carbodiimide hydrochloride (8.0 mg, 0.041 mmol) and 1-hydroxybenzotriazole (6.3 mg, 0.041 mmol) were added to a solution of compound **S8** (17 mg, 0.041 mmol) in DMF (1 mL). The solution was stirred at room temperature for 10 min and **S3b** (25 mg, 0.034



mmol) was then added. After 18 h, the reaction mixture was diluted with EtOAc. The combined organic layer was washed with 5% citric acid, 5% NaHCO<sub>3</sub>, and brine. The organic layer was dried over Na<sub>2</sub>SO<sub>4</sub> and evaporated to dryness. The residue was purified by flash chromatography (10:1 to 5:1 CHCl<sub>3</sub>/MeOH) to afford compound **S4b** as a white solid (19 mg, 50%). <sup>1</sup>H NMR (500 MHz, CD<sub>3</sub>OD): δ 8.47–8.38 (m, 1H), 8.20 (s, 1H), 7.76–7.68 (m, 8H), 6.13 (d, *J* = 5.7 Hz, 1H), 4.66–4.60 (m, 1H), 4.57–4.49 (m, 1H), 4.45–4.39 (m, 1H), 4.38–4.29 (m, 1H), 4.29–4.24 (m, 1H), 4.18–4.09 (m, 1H), 3.59–3.52 (m, 1H), 3.50–3.40 (m, 2H), 3.39–3.34 (m, 1H), 3.11–3.04 (m, 2H), 2.70 (t, *J* = 6.9 Hz, 2H), 2.59–2.51 (m, 4H), 2.32–2.26 (m, 3H), 2.25–2.12 (m, 1H), 2.04–1.82 (m, 4H), 1.82–1.70 (m, 1H), 1.58–1.38 (m, 13H), 0.94 (s, 9H), 0.16 (s, 3H), 0.15 (s, 3H). <sup>13</sup>C NMR (125 MHz, CD<sub>3</sub>OD): δ 196.5, 174.4, 174.0, 173.3, 157.2, 156.6, 153.9, 150.7, 144.3, 144.2, 141.4, 134.0, 133.9, 132.3, 132.2, 120.3, 120.0, 119.9, 87.6, 85.4, 84.1, 83.0, 81.2, 72.7, 71.5, 70.3, 69.9, 63.5, 47.7, 40.1, 36.7, 33.2, 31.8, 28.9, 28.7, 28.1, 26.9, 26.3, 25.5, 24.5, 19.0, 18.6, –4.4, –4.6. (The <sup>13</sup>C signal of the sulfamoyloxy-linked carbonyl, around 180 ppm, was not observed.) HRMS (ESI<sup>–</sup>): [M–H]<sup>–</sup> calcd for C<sub>53</sub>H<sub>71</sub>N<sub>10</sub>O<sub>13</sub>SSi, 1115.4698; found, 1115.4696.

### L-Pro-AMS-BPyne (**2**)

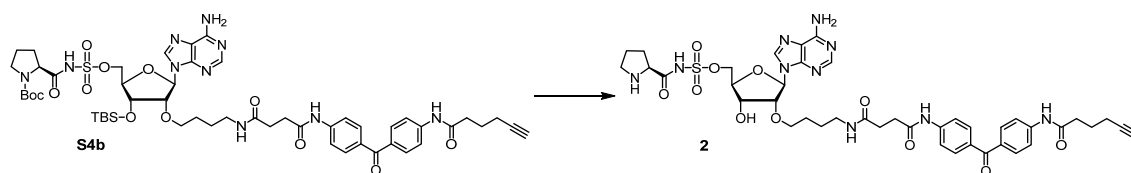

Compound **S4b** (19 mg, 0.017 mmol) was dissolved in a 4:1 (v/v) mixture of TFA and H<sub>2</sub>O at room temperature. After 6 h, the flask was placed on the rotary evaporator and the TFA and H<sub>2</sub>O were removed at reduced pressure. The residue was purified by flash chromatography (3:1 CHCl<sub>3</sub>/MeOH) to afford compound **2** as a white solid (14 mg, 91%). <sup>1</sup>H NMR (500 MHz, CD<sub>3</sub>OD): δ 8.50 (s, 1H), 8.19 (s, 1H), 7.78–7.69 (m, 8H), 6.15 (d, *J* = 5.2 Hz, 1H), 4.49 (t, *J* = 4.6 Hz, 1H), 4.42 (t, *J* = 5.2 Hz, 1H), 4.39–4.26 (m, 3H), 4.08 (dd, *J* = 8.6, 6.9 Hz, 1H), 3.69–3.62 (m, 1H), 3.61–3.54 (m, 1H), 3.39–3.34 (m, 1H), 3.28–3.22 (m, 1H), 3.16–3.10 (m, 2H), 2.70 (t, *J* = 6.9 Hz, 2H), 2.60–2.51 (m, 4H), 2.37–2.26 (m, 4H), 2.16–2.07 (m, 1H), 1.98–1.86 (m, 4H), 1.64–1.43 (m, 4H). <sup>13</sup>C NMR (125 MHz, CD<sub>3</sub>OD): δ 196.6, 174.9, 174.5, 174.1, 173.3, 157.3, 154.0, 150.7, 144.3, 144.2, 141.1, 134.0, 132.28, 132.25, 120.2, 120.1, 120.0, 87.7, 84.5, 84.1, 83.6, 71.6, 70.9, 70.4, 63.8, 47.3, 40.0, 36.7, 33.2, 31.8, 30.8, 37.8, 26.9, 25.5, 24.9, 18.6. HRMS (ESI<sup>+</sup>): [M+Na]<sup>+</sup> calcd for C<sub>42</sub>H<sub>50</sub>N<sub>10</sub>O<sub>11</sub>SNa, 925.3279; found, 925.3251.

**Chemical Synthesis of 3** Compound number in bold refers to the structures shown in Scheme S1.

**((2*R*,3*R*,4*R*,5*R*)-5-(6-Amino-9*H*-purin-9-yl)-4-(4-azidobutoxy)-3-((*tert*-butyldimethylsilyl)oxy)tetrahydrofuran-2-yl)methyl ((*S*)-2,5-bis((*tert*-butoxycarbonyl)amino)pentanoyl)sulfamate (**S2c**)**

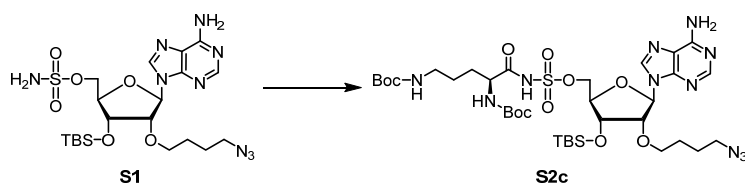

Boc-Orn(Boc)-OSu (73 mg, 0.17 mmol) and cesium carbonate (108 mg, 0.33 mmol) were added to a solution of compound **S1** (60 mg, 0.11 mmol) in DMF (1 mL). The solution was stirred at room temperature for 2 h. The reaction mixture was then filtered through a pad of Celite. The filtrate was concentrated under reduced pressure. The residue was purified by flash chromatography (10:1 to 5:1 CHCl<sub>3</sub>/MeOH) to afford compound **S2c** as a white solid (80 mg, 83%). <sup>1</sup>H NMR (500 MHz, CD<sub>3</sub>OD): δ 8.49 (s, 1H), 8.23 (s, 1H), 6.16 (d, *J* = 6.3 Hz, 1H), 4.63–4.58 (m, 1H), 4.57–4.50 (m, 1H), 4.48–4.40 (m, 1H), 4.39–4.32 (m, 1H), 4.32–4.26 (m, 1H), 4.07–3.92 (m, 1H), 3.66–3.57 (m, 1H), 3.51–3.44 (m, 1H), 3.19–3.12 (m, 2H), 3.09–2.99 (m, 2H), 1.87–1.73 (m, 1H), 1.66–1.47 (m, 7H), 1.41 (s, 18H), 0.96 (s, 9H), 0.174 (s, 3H), 0.169 (s, 3H). <sup>13</sup>C NMR (125 MHz, CD<sub>3</sub>OD): δ 177.7, 158.5, 157.7, 157.0, 153.5, 150.6, 141.4, 120.3, 87.5, 85.2, 83.2, 80.4, 79.9, 72.6, 71.3, 70.2, 57.0, 52.1, 40.8, 31.1, 28.8, 28.0, 27.2, 26.6, 26.3, 19.0, –4.4, –4.6. HRMS (ESI<sup>+</sup>): [M+H]<sup>+</sup> calcd for C<sub>35</sub>H<sub>62</sub>N<sub>11</sub>O<sub>11</sub>SSi, 872.4120; found, 872.4112.

**((2*R*,3*R*,4*R*,5*R*)-5-(6-Amino-9*H*-purin-9-yl)-4-(4-aminobutoxy)-3-((*tert*-butyldimethylsilyl)oxy)tetrahydrofuran-2-yl)methyl ((*S*)-2,5-bis((*tert*-butoxycarbonyl)amino)pentanoyl)sulfamate (**S3c**)**

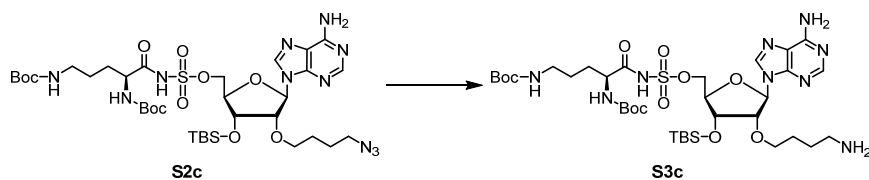

To a solution of **S2c** (62 mg, 0.071 mmol) in MeOH (2 mL) was added 10% Pd/C (6 mg). The resulting suspension was hydrogenated under an atmosphere of H<sub>2</sub> at room temperature for 24 h. The reaction mixture was filtered through a pad of Celite, which was further washed with MeOH (10 mL). The combined filtrate was concentrated under reduced pressure. The residue was purified by flash chromatography (4:1 CHCl<sub>3</sub>/MeOH) to afford compound **S3c** as a white solid (40 mg, 67%). <sup>1</sup>H NMR (500 MHz, CD<sub>3</sub>OD): δ 8.57 (s, 1H), 8.20 (s, 1H), 6.18 (d, *J* = 6.3 Hz, 1H), 4.63–4.51 (m, 2H), 4.32–4.20 (m, 3H), 4.05–3.93 (m, 1H), 3.62–3.55 (m, 1H), 3.53–3.45 (m, 1H), 3.07–3.00 (m, 2H), 2.91–2.83 (m, 2H), 1.88–1.79 (m, 1H), 1.69–1.48 (m, 7H), 1.47–1.38 (m, 18H), 0.96 (s, 9H), 0.17 (s, 3H), 0.16 (s, 3H). <sup>13</sup>C NMR (125 MHz, CD<sub>3</sub>OD): δ 180.7, 158.4, 157.6, 157.4, 154.0, 150.8, 141.1, 120.1, 87.0, 86.0, 83.5, 80.1, 79.8, 73.0, 70.7, 69.1, 57.6, 41.0, 40.5, 32.0, 28.8, 27.6, 27.0, 26.3, 25.4, 19.0, –4.3, –4.5. HRMS (ESI<sup>+</sup>): [M+H]<sup>+</sup> calcd for C<sub>35</sub>H<sub>64</sub>N<sub>9</sub>O<sub>11</sub>SSi,

846.4215; found, 846.4201.

**((2*R*,3*R*,4*R*,5*R*)-5-(6-Amino-9*H*-purin-9-yl)-3-((*tert*-butyldimethylsilyl)oxy)-4-(4-(4-((4-(4-(hex-5-ynamid o)benzoyl)phenyl)amino)-4-oxobutanamido)butoxy)tetrahydrofuran-2-yl)methyl ((*S*)-2,5-bis((*tert*-butoxycarbonyl)amino)pentanoyl)sulfamate (**S4c**))**

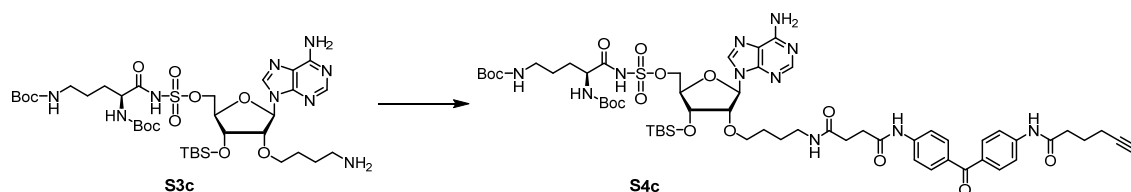

1-Ethyl-3-(3-dimethylaminopropyl) carbodiimide hydrochloride (8.0 mg, 0.043 mmol) and 1-hydroxybenzotriazole (6.6 mg, 0.043 mmol) were added to a solution of compound **S8** (17 mg, 0.043 mmol) in DMF (1 mL). The solution was stirred at room temperature for 10 min and **S3c** (30 mg, 0.035 mmol) was added. After 3 h, the reaction mixture was diluted with EtOAc. The mixture was washed with 5% citric acid, 5% NaHCO<sub>3</sub>, and brine. The organic layer was dried over Na<sub>2</sub>SO<sub>4</sub> and evaporated to dryness. The residue was purified by flash chromatography (10:1 to 5:1 CHCl<sub>3</sub>/MeOH) to afford compound **S4c** as a white solid (26 mg, 60%). <sup>1</sup>H NMR (500 MHz, CD<sub>3</sub>OD): δ 8.46 (s, 1H), 8.20 (s, 1H), 7.76–7.70 (m, 8H), 6.14 (d, *J* = 5.7 Hz, 1H), 4.60 (dd, *J* = 4.6, 2.9 Hz, 1H), 4.51 (dd, *J* = 5.7, 5.2 Hz, 1H), 4.42–4.36 (m, 1H), 4.33–4.25 (m, 2H), 4.02–3.95 (m, 1H), 3.59–3.53 (m, 1H), 3.49–3.42 (m, 1H), 3.11–3.05 (m, 2H), 3.02 (t, *J* = 6.9 Hz, 2H), 2.71 (t, *J* = 6.9 Hz, 2H), 2.58–2.51 (m, 4H), 2.32–2.87 (m, 3H), 1.94–1.86 (m, 2H), 1.86–1.77 (m, 1H), 1.65–1.34 (m, 25H), 0.94 (s, 9H), 0.16 (s, 3H), 0.15 (s, 3H). <sup>13</sup>C NMR (125 MHz, CD<sub>3</sub>OD): δ 196.5, 174.4, 174.0, 173.3, 158.5, 157.8, 157.2, 153.9, 150.7, 144.3, 144.2, 141.2, 134.0, 133.9, 132.3, 132.2, 120.3, 120.0, 119.9, 87.6, 85.2, 84.1, 83.1, 80.3, 79.9, 72.6, 71.5, 70.4, 69.6, 57.7, 41.0, 40.0, 36.7, 33.2, 31.8, 28.8, 28.1, 27.2, 26.9, 26.3, 25.5, 19.0, 18.6, –4.4, –4.5. (The <sup>13</sup>C signal of the sulfamoyloxy-linked carbonyl, around 180 ppm, was not observed.) HRMS (ESI<sup>+</sup>): [M+H]<sup>+</sup> calcd for C<sub>58</sub>H<sub>84</sub>N<sub>11</sub>O<sub>15</sub>SSi, 1234.5638; found, 1234.5603.

**L-Orn-AMS-BPyne (3)**

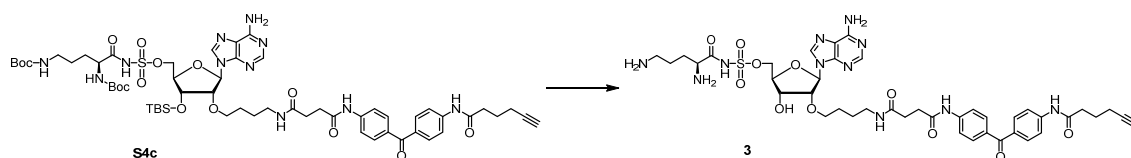

Compound **S4c** (20 mg, 0.016 mmol) was dissolved in a 4:1 (v/v) mixture of TFA and H<sub>2</sub>O at room temperature. After 3 h, the flask was placed on the rotary evaporator and the TFA and H<sub>2</sub>O were removed at reduced pressure. The residue was purified by flash chromatography (4:1 CHCl<sub>3</sub>/MeOH) to afford compound

**3** as a white solid (13 mg, 88%). <sup>1</sup>H NMR (500 MHz, CD<sub>3</sub>OD): δ 8.65 (s, 1H), 8.38 (s, 1H), 7.74–7.70 (m, 8H), 6.20 (d, *J* = 4.0 Hz, 1H), 4.50 (t, *J* = 5.2 Hz, 1H), 4.46–4.41 (m, 1H), 4.41–4.34 (m, 2H), 4.32–4.28 (m, 1H), 3.77–3.73 (m, 1H), 3.72–3.61 (m, 2H), 3.20–3.13 (m, 2H), 3.03–2.94 (m, 2H), 2.72 (t, *J* = 6.9 Hz, 2H), 2.59–2.52 (m, 4H), 2.32–2.26 (m, 3H), 2.00–1.80 (m, 6H), 1.67–1.58 (m, 2H), 1.58–1.48 (m, 2H). <sup>13</sup>C NMR (125 MHz, CD<sub>3</sub>OD): δ 196.5, 174.53, 174.47, 174.1, 173.3, 152.3, 149.8, 146.3, 144.24, 144.22, 143.4, 134.0, 133.9, 132.2, 120.2, 120.1, 119.9, 88.6, 84.4, 84.1, 83.8, 71.7, 70.6, 70.4, 69.0, 55.9, 40.04, 39.99, 36.7, 33.1, 31.7, 29.4, 27.7, 27.0, 25.5, 24.3, 18.6. HRMS (ESI<sup>+</sup>): [M+Na]<sup>+</sup> calcd for C<sub>42</sub>H<sub>53</sub>N<sub>11</sub>O<sub>11</sub>SNa, 942.3544; found, 942.3550.

**Chemical Synthesis of S8** Compound number in bold refers to the structures shown in Scheme S2.

**Methyl 4-((4-(4-aminobenzoyl)phenyl)amino)-4-oxobutanoate (S6)**

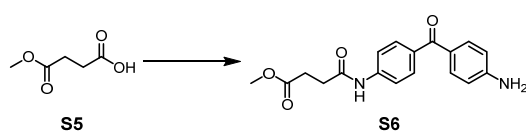

1-Ethyl-3-(3-dimethylaminopropyl)carbodiimide hydrochloride (905 mg, 4.72 mmol) and 1-hydroxybenzotriazole (723 mg, 4.72 mmol) were added to a solution of compound **S5** (623 mg, 4.72 mmol) in DMF (20 mL). The solution was stirred at room temperature for 5 min and 4, 4'-diaminobenzophenone (500 mg, 2.36 mmol) was added. After 12 h, the reaction mixture was diluted with EtOAc. The mixture was washed with 5% citric acid, 5% NaHCO<sub>3</sub>, and brine. The organic layer was dried over Na<sub>2</sub>SO<sub>4</sub> and evaporated to dryness. The residue was purified by flash chromatography (2:1 EtOAc/hexane) to afford compound **S6** as a white solid (410 mg, 53%). <sup>1</sup>H NMR (500 MHz, DMSO-*d*<sub>6</sub>): δ 10.26 (br, 1H), 7.69 (d, *J* = 8.6 Hz, 2H), 7.58 (d, *J* = 8.0 Hz, 2H), 7.49 (d, *J* = 8.6 Hz, 2H), 6.59 (d, *J* = 8.6 Hz, 2H), 6.06 (s, 2H), 3.59 (s, 3H), 2.68–2.59 (m, 4H). <sup>13</sup>C NMR (125 MHz, DMSO-*d*<sub>6</sub>): δ 192.4, 172.8, 170.3, 153.4, 141.9, 133.2, 132.4, 133.2, 132.4, 130.2, 124.2, 118.0, 112.5, 51.4, 31.0, 28.4. HRMS (ESI<sup>+</sup>): [M+H]<sup>+</sup> calcd for C<sub>18</sub>H<sub>19</sub>N<sub>2</sub>O<sub>4</sub>, 327.1345; found, 327.1326.

**Methyl 4-((4-(4-(hex-5-ynamido)benzoyl)phenyl)amino)-4-oxobutanoate (S7)**

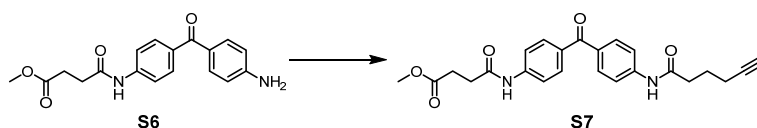

Oxalyl chloride (154 μL, 1.8 mmol) and DMF (20 μL) were added to a solution of 5-hexynoic acid (129 μL, 1.2 mmol) in benzene (10 mL). After 2 h, the flask was placed on the rotary evaporator and the DMF and

benzene were removed at reduced pressure to afford 5-hexynoic chloride as a red oil. A solution of crude 5-hexynoyl chloride, compound **S6** (185 mg, 0.57 mmol), and DIEA (200  $\mu$ L, 1.14 mmol) in THF (5 mL) was stirred at room temperature for 9 h. The reaction mixture was diluted with EtOAc. The mixture was washed with 5% citric acid, saturated  $\text{NaHCO}_3$ , and brine. The organic layer was dried over  $\text{Na}_2\text{SO}_4$  and evaporated to dryness. The residue was purified by flash chromatography (1:1 EtOAc/hexane) to afford compound **S7** as a white solid (122 mg, 51%).  $^1\text{H}$  NMR (500 MHz,  $\text{DMSO-}d_6$ ):  $\delta$  10.35 (br, 1H), 10.28 (br, 1H), 7.66–7.78 (m, 8H), 3.59 (s, 3H), 2.81 (t,  $J = 2.9$  Hz, 1H), 2.69–2.59 (m, 4H), 2.45–2.48 (m, 2H), 2.23 (ddd,  $J = 6.9, 6.9, 2.9$  Hz, 2H), 1.81–1.73 (m, 2H).  $^{13}\text{C}$  NMR (125 MHz,  $\text{DMSO-}d_6$ ):  $\delta$  193.3, 172.8, 171.2, 170.5, 143.0, 142.9, 131.7, 130.9, 130.8, 118.2, 118.1, 84.0, 71.7, 51.4, 35.2, 31.0, 28.4, 23.8, 17.3. HRMS (ESI<sup>+</sup>):  $[\text{M}+\text{H}]^+$  calcd for  $\text{C}_{24}\text{H}_{25}\text{N}_2\text{O}_5$ , 421.1763; found, 421.1761.

#### 4-((4-(4-(Hex-5-ynamido)benzoyl)phenyl)amino)-4-oxobutanoic acid (**S8**)

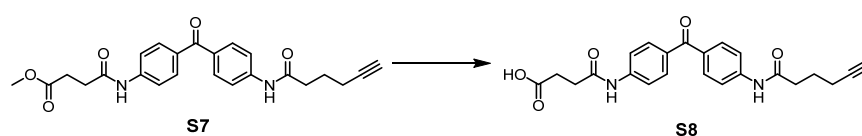

To a solution of **S7** (122 mg, 0.29 mmol) in 3:1 MeOH/THF (4 mL) was added 145  $\mu$ L of a 4 M aqueous NaOH solution at room temperature. Stirring was continued at room temperature for 12 h. The flask was then placed on a rotary evaporator and the MeOH and THF were removed at reduced pressure. The residue was diluted with  $\text{H}_2\text{O}$  and washed with EtOAc. The aqueous layer was acidified with citric acid monohydrate and back extracted with EtOAc. The combined organic layer was washed with brine, dried over  $\text{Na}_2\text{SO}_4$ , and evaporated to dryness to afford compound **S8** as a pale yellow solid (114 mg, 97%).  $^1\text{H}$  NMR (500 MHz,  $\text{DMSO-}d_6$ ):  $\delta$  10.33 (br, 1H), 10.29 (br, 1H), 7.75 (dd,  $J = 8.6, 3.4$  Hz, 4H), 7.69 (d,  $J = 8.6$  Hz, 4H), 2.80 (t,  $J = 2.9$  Hz, 1H), 2.64–2.58 (m, 2H), 2.57–2.51 (m, 2H), 2.44–2.47 (m, 2H), 2.22 (ddd,  $J = 6.9, 6.9, 2.9$  Hz, 2H), 1.81–1.73 (m, 2H).  $^{13}\text{C}$  NMR (125 MHz,  $\text{DMSO-}d_6$ ):  $\delta$  193.4, 173.8, 171.3, 170.8, 143.09, 143.06, 131.8, 131.7, 131.0, 130.9, 118.3, 118.2, 84.0, 71.7, 35.3, 31.3, 28.7, 23.8, 17.4. HRMS (ESI<sup>+</sup>):  $[\text{M}+\text{H}]^+$  calcd for  $\text{C}_{23}\text{H}_{23}\text{N}_2\text{O}_5$ , 407.1607; found, 407.1604.

**Chemical Synthesis of 5** Compound number in bold refers to the structures shown in Scheme S3.

#### **5'-O-[N-(N-Boc-L-prolyl)sulfamoyl]-2',3'-O-isopropylideneadenosine triethylammonium salt (**S10a**)**

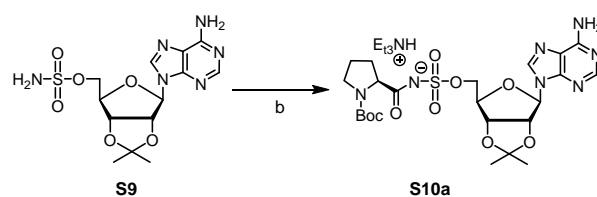

Boc-Pro-OSu (63 mg, 0.20 mmol) and cesium carbonate (127 mg, 0.39 mmol) were added to a solution of 5'-*O*-sulfamoyl-2',3'-isopropylideneadenosine **S9** (50 mg, 0.13 mmol) in DMF (1 mL). The solution was stirred at room temperature for 1 h. The reaction mixture was filtered through a pad of Celite. The filtrate was concentrated under reduced pressure. The residue was purified by flash chromatography (91:9:1 to 86:14:1 EtOAc/MeOH/Et<sub>3</sub>N) to afford compound **S10a** as a white solid (77 mg, 87%). <sup>1</sup>H NMR (500 MHz, CD<sub>3</sub>OD): δ 8.48–8.42 (m, 1H), 8.21 (s, 1H), 6.23 (d, *J* = 3.4 Hz, 1H), 5.41–5.35 (m, 1H), 5.17–5.10 (m, 1H), 4.56–4.51 (m, 1H), 4.32–4.17 (m, 2H), 4.16–4.07 (m, 1H), 3.51–3.43 (m, 1H), 3.41–3.32 (m, 1H), 3.19 (q, *J* = 7.5 Hz, 6H, Et<sub>3</sub>N-CH<sub>2</sub>), 2.22–2.10 (m, 1H), 1.97–1.85 (m, 2H), 1.82–1.74 (m, 1H), 1.60 (s, 3H), 1.44–1.37 (m, 12H), 1.28 (t, *J* = 7.5 Hz, 9H, Et<sub>3</sub>N-CH<sub>3</sub>). <sup>13</sup>C NMR (125 MHz, CD<sub>3</sub>OD): δ 181.5, 157.3, 156.4, 154.0, 150.5, 141.4, 120.2, 115.3, 91.8, 85.8, 83.3, 81.0, 80.4, 69.5, 63.9, 47.9, 47.7, 32.6, 28.8, 27.5, 25.6, 24.5, 9.2. HRMS (ESI<sup>-</sup>): [M-H]<sup>-</sup> calcd for C<sub>23</sub>H<sub>32</sub>N<sub>7</sub>O<sub>9</sub>S, 582.1981; found, 582.1981.

### 5'-*O*-[*N*-(*L*-Prolyl)sulfamoyl]adenosine triethylammonium salt (**5**)

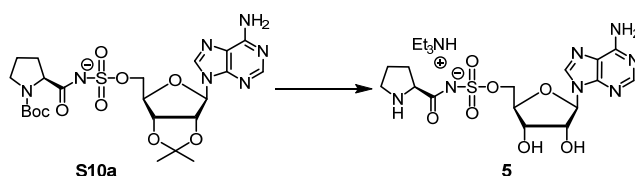

Compound **S10a** (30 mg, 0.044 mmol) was dissolved in a 4:1 (v/v) mixture of TFA and H<sub>2</sub>O at room temperature. After 2 h, the flask was placed on the rotary evaporator and the TFA and H<sub>2</sub>O were removed at reduced pressure. The residue was purified by flash chromatography (67:33:1 to 50:50:1 CHCl<sub>3</sub>/MeOH/Et<sub>3</sub>N) to afford compound **5** as a white solid (16 mg, 74%). <sup>1</sup>H NMR (500 MHz, DMSO-*d*<sub>6</sub>): δ 8.35 (s, 1H), 8.14 (s, 1H), 7.27 (br, 2H), 5.90 (d, *J* = 5.7 Hz, 1H), 4.61–4.56 (m, 1H), 4.18–4.12 (m, 2H), 4.11–4.03 (m, 2H), 3.91–3.86 (m, 1H), 3.23–3.16 (m, 1H), 3.10–3.04 (m, 1H), 2.72 (q, *J* = 6.9 Hz, 2H, Et<sub>3</sub>N-CH<sub>2</sub>), 2.19–2.10 (m, 1H), 1.95–1.86 (m, 1H), 1.85–1.72 (m, 2H), 1.03 (t, *J* = 6.9 Hz, 3H, Et<sub>3</sub>N-CH<sub>3</sub>). <sup>13</sup>C NMR (125 MHz, DMSO-*d*<sub>6</sub>): δ 171.7, 156.0, 152.6, 149.6, 139.4, 118.9, 87.1, 82.4, 73.4, 70.7, 67.7, 61.9, 45.7, 45.3, 29.1, 23.4, 10.2. HRMS (ESI<sup>-</sup>): [M-H]<sup>-</sup> calcd for C<sub>15</sub>H<sub>20</sub>N<sub>7</sub>O<sub>7</sub>S, 442.1145; found, 442.1146.

**Chemical Synthesis of 7** Compound number in bold refers to the structures shown in Scheme S3.

**5'-O-[N-(N-Boc-L-ornithinyl)( $\delta$ -Boc)sulfamoyl]-2',3'-O-isopropylideneadenosine triethylammonium salt (S10b)**

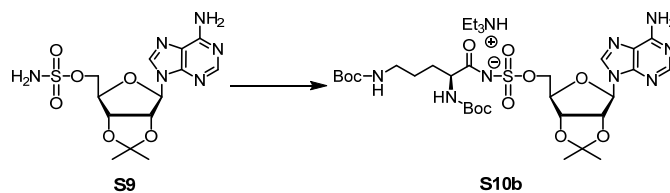

Boc-Orn(Boc)-OSu (125 mg, 0.29 mmol) and cesium carbonate (254 mg, 0.78 mmol) were added to a solution of 5'-O-sulfamoyl-2',3'-isopropylideneadenosine **S9** (100 mg, 0.26 mmol) in DMF (3 mL). The solution was stirred at room temperature for 3 h. The reaction mixture was filtered through a pad of Celite. The filtrate was concentrated under reduced pressure. The residue was purified by flash chromatography (95:5:1 to 83:17:1 CHCl<sub>3</sub>/MeOH/Et<sub>3</sub>N) to afford compound **S10b** as a white solid (45 mg, 22%). <sup>1</sup>H NMR (500 MHz, CD<sub>3</sub>OD):  $\delta$  8.47 (s, 1H), 8.22 (s, 1H), 6.24 (d,  $J$  = 3.4 Hz, 1H), 5.35 (q,  $J$  = 2.9 Hz, 1H), 5.15–5.09 (m, 1H), 4.56–4.52 (m, 1H), 4.23 (d,  $J$  = 4.0 Hz, 2H), 4.01–3.94 (m, 1H), 3.19 (q,  $J$  = 7.5 Hz, 6H, Et<sub>3</sub>N-CH<sub>2</sub>), 3.10–2.98 (m, 2H), 1.86–1.73 (m, 1H), 1.61 (s, 3H), 1.60–1.49 (m, 3H), 1.47–1.40 (m, 18H), 1.39 (s, 3H), 1.28 (t,  $J$  = 7.5 Hz, 9H, Et<sub>3</sub>N-CH<sub>3</sub>). <sup>13</sup>C NMR (125 MHz, CD<sub>3</sub>OD):  $\delta$  180.7, 158.4, 157.6, 157.3, 154.0, 150.5, 141.4, 120.1, 115.2, 91.8, 85.7, 85.6, 83.3, 80.0, 79.7, 69.7, 57.6, 47.8, 41.0, 31.8, 28.8, 27.5, 25.6, 9.2. HRMS (ESI<sup>+</sup>): [M+H]<sup>+</sup> calcd for C<sub>28</sub>H<sub>45</sub>N<sub>8</sub>O<sub>11</sub>S, 701.2929; found, 701.2926.

**5'-O-[N-(L-Ornithinyl)sulfamoyl]adenosine triethylammonium salt (7)**

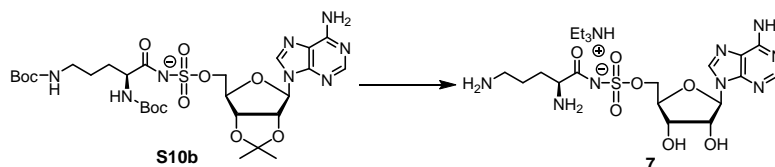

Compound **S10b** (40 mg, 0.047 mmol) was dissolved in a 4:1 (v/v) mixture of TFA and H<sub>2</sub>O at room temperature. After 3 h, the flask was placed on the rotary evaporator, and the TFA and H<sub>2</sub>O were removed at reduced pressure. The residue was purified by HPLC [COSMISIL 5C<sub>18</sub>-PAQ: C-18 reverse-phase column,  $\phi$  10 mm  $\times$  250 mm, aqueous TFA (0.01%), 4.0 mL/min, 210 nm,  $t_R$ : 9.8 min] to afford compound **7** as a colorless oil (26 mg, 98%). <sup>1</sup>H NMR (500 MHz, CD<sub>3</sub>OD):  $\delta$  8.63 (s, 1H), 8.39 (s, 1H), 6.13 (d,  $J$  = 4.6 Hz, 1H), 4.63 (dd,  $J$  = 5.2, 4.6 Hz, 1H), 4.46–4.31 (m, 4H), 3.77 (dd,  $J$  = 6.3, 5.7 Hz, 1H), 3.20 (q,  $J$  = 7.5 Hz, 6H, Et<sub>3</sub>N-CH<sub>2</sub>), 3.03–2.97 (m, 2H), 2.05–1.78 (m, 4H), 1.31 (t,  $J$  = 7.5 Hz, 9H, Et<sub>3</sub>N-CH<sub>3</sub>). <sup>13</sup>C NMR (125 MHz, CD<sub>3</sub>OD):  $\delta$  174.6, 152.6, 150.1, 146.5, 143.5, 120.1, 90.2, 84.3, 76.3, 71.8, 69.5, 55.9, 47.8, 40.0, 29.3, 24.3,

9.2. HRMS (ESI<sup>+</sup>): [M+Na]<sup>+</sup> calcd for C<sub>15</sub>H<sub>24</sub>N<sub>8</sub>O<sub>7</sub>SNa, 483.1386; found, 483.1381.

**Chemical Synthesis of 8** Compound number in bold refers to the structures shown in Scheme S3.

**5'-O-[N-(N-Boc-L-leucyl)sulfamoyl]-2',3'-O-isopropylideneadenosine triethylammonium salt (S10c)**

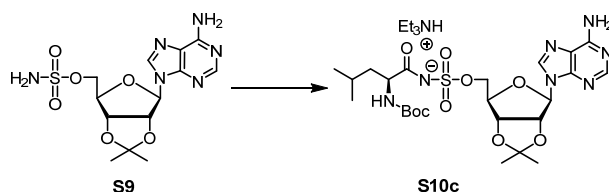

Boc-Leu-OSu (193 mg, 0.59 mmol) and cesium carbonate (381 mg, 1.17 mmol) were added to a solution of 5'-O-sulfamoyl-2',3'-isopropylideneadenosine **S9** (150 mg, 0.39 mmol) in DMF (4 mL). The solution was stirred at room temperature for 4 h. The reaction mixture was filtered through a pad of Celite. The filtrate was concentrated under reduced pressure. The residue was purified by flash chromatography (97:3:1 CHCl<sub>3</sub>/MeOH/Et<sub>3</sub>N) to afford compound **S10c** as a white solid (168 mg, 61%). <sup>1</sup>H NMR (500 MHz, CD<sub>3</sub>OD): δ 8.47 (s, 1H), 8.22 (s, 1H), 6.23 (d, *J* = 3.4 Hz, 1H), 5.37–5.32 (m, 1H), 5.14–5.08 (m, 1H), 4.56–4.51 (m, 1H), 4.23 (d, *J* = 3.4 Hz, 2H), 4.09–4.00 (m, 1H), 3.19 (q, *J* = 7.5 Hz, 6H, Et<sub>3</sub>N-CH<sub>2</sub>), 1.77–1.65 (m, 1H), 1.61 (s, 3H), 1.60–1.50 (m, 1H), 1.48–1.34 (m, 13H), 1.29 (t, *J* = 7.5 Hz, 9H, Et<sub>3</sub>N-CH<sub>3</sub>), 0.92 (d, *J* = 1.7 Hz, 3H), 0.91 (d, *J* = 1.7 Hz, 3H). <sup>13</sup>C NMR (125 MHz, CD<sub>3</sub>OD): δ 181.7, 157.7, 157.3, 154.0, 150.5, 141.4, 120.1, 115.2, 91.8, 85.8, 85.6, 83.3, 79.9, 79.5, 69.7, 56.8, 47.9, 43.7, 28.8, 27.5, 26.1, 25.6, 23.7, 22.2, 9.2. HRMS (ESI<sup>+</sup>): [M+H]<sup>+</sup> calcd for C<sub>24</sub>H<sub>38</sub>N<sub>7</sub>O<sub>9</sub>S, 600.2452; found, 600.2437.

**5'-O-[N-(L-Leucyl)sulfamoyl]adenosine triethylammonium salt (8)**

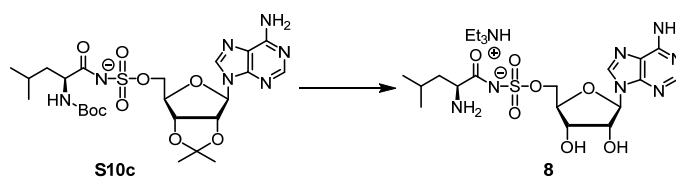

Compound **S10c** (70 mg, 0.10 mmol) was dissolved in a 4:1 (v/v) mixture of TFA and H<sub>2</sub>O at room temperature. After 5 h, the flask was placed on the rotary evaporator, and the TFA and H<sub>2</sub>O were removed at reduced pressure. The residue was purified by flash chromatography (83:17:1 to 67:33:1 CHCl<sub>3</sub>/MeOH/Et<sub>3</sub>N) to afford compound **8** as a white solid (35 mg, 69%). <sup>1</sup>H NMR (500 MHz, CD<sub>3</sub>OD): δ 8.50 (s, 1H), 8.19 (s, 1H), 6.08 (d, *J* = 5.2 Hz, 1H), 4.66–4.61 (m, 1H), 4.44–4.36 (m, 2H), 4.36–4.28 (m, 2H), 3.70–3.65 (m, 1H), 3.11 (q, *J* = 7.5 Hz, 3H, Et<sub>3</sub>N-CH<sub>2</sub>), 1.84–1.73 (m, 2H), 1.64–1.53 (m, 1H), 1.26 (t, *J* = 7.5 Hz, 4.5H, Et<sub>3</sub>N-CH<sub>3</sub>), 0.96 (d, *J* = 6.3 Hz, 3H), 0.93 (d, *J* = 6.3 Hz, 3H). <sup>13</sup>C NMR (125 MHz, CD<sub>3</sub>OD): δ 176.8, 157.2, 153.9, 150.7, 141.2, 120.1, 89.5, 84.2, 76.1, 71.9, 69.1, 55.7, 47.7, 42.2, 25.7, 23.2, 22.2, 9.4. HRMS (ESI<sup>+</sup>):



[M+H]<sup>+</sup> calcd for C<sub>16</sub>H<sub>26</sub>N<sub>7</sub>O<sub>7</sub>S, 460.1614; found, 460.1600.

## Chemical Biology Procedures

**Protein Expression and Materials:** Recombinant proteins *holo*-GrsA and *holo*-TycB1 were expressed and purified as previously described.<sup>2,7,8,9</sup> These proteins were overproduced and isolated as C-terminal His-tagged constructs using the *E. coli* overexpression strain, BL21 (DE3), kindly provided by Prof. Mohamed A. Marahiel at Philipps-Universität Marburg, Germany. The *ausA1* (A<sub>1</sub>-T<sub>1</sub>) gene was PCR amplified genomic DNA from *S. aureus* ATCC 700699 using primers *ausA1* F (5'-GCCTCCATGACCATGGTTATGGGTAATTTGAGATTTCAAC-3') and *ausA1* R (5'-CCGAATTCGTCAGCACATAATCATCTTTAACTATAGCTTC-3'), and subsequently cloned into plitmus28-*ausA1*. Plasmid litmus28-*ausA1* was digested with *Nco*I and *Bam*HI, and the gene was subcloned into pET28b to produce pET28b-*ausA1*, an expression vector for *apo*-AusA1 with a hexahistidine appended to the C terminus. Sequencing revealed the expression plasmid to be error free. For expression and purification of *apo*-AusA1, pET28b-*ausA1* was transformed into *E. coli* BL21 (DE3) cells. Overnight cultures were used to inoculate 1 L of LB medium supplemented with 50 µg/mL kanamycin. Cultures were allowed to grow to an A<sub>600</sub> of 0.6 at 37 °C, then induced with IPTG to a final concentration of 0.1 mM, and allowed to grow for 12 h at 18 °C. Cells were pelleted and resuspended in lysis buffer (20 mM Tris-HCl, pH 8.0 and 0.5% Triton-X). The cells were then lysed by sonication at 4 °C using an ultrasonic disruptor UD201 (Tomy Digital Biology Co., Ltd, Japan). The resulting cell lysate was centrifuged to remove cell debris and the supernatant was loaded onto a Ni Sepharose high-performance resin (GE Healthcare) and eluted with a gradient of imidazole (20–250 mM). Eluted proteins were visualized by SDS-PAGE with Coomassie Brilliant Blue stain and quantitated by the method of Bradford.<sup>10</sup> Fractions containing the recombinant proteins were pooled and dialyzed against assay buffer (20 mM Tris-HCl, pH 8.0, 1 mM MgCl<sub>2</sub>, and 1 mM TCEP). After the addition of 10% glycerol (v/v) the protein was stored at –80 °C.

**Preparation of Lysates for Proteomic Labeling Experiments:** *Aneurinibacillus migulanus* ATCC 9999 was cultured and the whole cell lysate was isolated as described previously.<sup>2</sup> The cellular lysate of *A. migulanus* ATCC 9999 has already been used to characterize an affinity probe for adenylation (A) domains in “Specific enrichment of nonribosomal peptide synthetase module by an affinity probe for adenylation domains. *Bioorg. Med. Chem. Lett.* **2014**, 24, 865-869.”

*Aneurinibacillus migulanus* DSM 5759 was obtained from the Deutsche Sammlung von Mikroorganismen und Zellkulturen (DSMZ, Braunschweig, Germany). The strain was maintained on nutrient agar. Single colonies were used to inoculate a rich complex medium (YPG) and shaken for 24 h at 37 °C. The medium contained 50 g/L yeast extract, 50 g/L bacto-peptone, and 5 g/L glucose. The seed culture (2 mL) was transferred to 250 mL of YPG and the resulting mixture was incubated at 37 °C. Growth was routinely monitored at A<sub>660</sub> on a U-2910 spectrophotometer (Hitachi). The cells (A<sub>660</sub> = 15.0) were harvested by centrifugation and stored in the freezer until used. The frozen cell pellet was resuspended in 20 mM Tris (pH

8.0), 1 mM MgCl<sub>2</sub>, 1 mM TCEP, 0.05% Igepal CA-630, and protease inhibitor cocktail. Because of the lability of the synthetase during mechanical cell disruption processes,<sup>11</sup> a gentle treatment of cells with lysozyme (0.2 mg/mL) was used to release intracellular protein. The cell suspension was incubated at 0 °C for 30 min. The mixture was then incubated at 30 °C for 30 min. The solution was centrifuged for 5 min at 15,000 rpm and the pellet was discarded. The total protein concentration was quantitated by the method of Bradford.<sup>10</sup>

### **Hydroxamate-MesG Assay<sup>1</sup>**

**Standard assay conditions:** Reactions contained NRPS enzymes to maintain initial velocity conditions, 20 mM Tris (pH 8.0), 2.5 mM ATP, 1 mM MgCl<sub>2</sub>, 1 mM TCEP, 150 mM hydroxylamine (pH 7.0), 0.1 U purine nucleoside phosphorylase (Sigma-Aldrich, N8264), 0.04 U inorganic pyrophosphatase (Sigma-Aldrich, I1643), 0.2 mM MesG (Berry & Associates), and 1 mM substrates. The reactions (100 µL) were run in 96-well half-area plates (Corning, 3881) and the cleavage of MesG was monitored at A<sub>355</sub> on an EnVision Multilabel Reader (PerkinElmer). Working stocks of hydroxylamine were prepared fresh by combining 500 µL of 4 M hydroxylamine, 250 µL of water, and 250 µL of 7 M NaOH on ice.

**Determination of  $K_i^{app}$  values of inhibitors by the hydroxamate-MesG assay:**  $K_i^{app}$  determination was performed using standard assay conditions. For *holo*-GrsA, compound **1** was tested from 25 to 5,000 nM using L-Phe (1 mM) as the competing substrate. The enzyme was fixed at 20 nM. Compounds **2** and **5** were varied from 0.625 to 50 µM, and *holo*-TycB1 (800 nM) and L-Pro (1 mM) were held constant. In all experiments, the total DMSO concentration was kept at 2.0%. Initial velocities were fit to the Morrison equation using Prism 5 (GraphPad Software).

### **Labeling of Recombinant GrsA and TycB1 by the Active Site-Directed Proteomic Probes 1 and 2:**

Standard conditions for probes **1** and **2**-recombinant protein reactions were as follows: recombinant GrsA (1 µM) and TycB1 (1 µM) were treated with probes **1** and **2** (1 µM from a 100 µM stock in DMSO) in assay buffer [20 mM Tris (pH 8.0), 1 mM MgCl<sub>2</sub>, 1 mM TCEP, and 0.0025% Igepal CA-630], respectively. Inhibition studies were performed by pre-incubation of GrsA (1 µM) and TycB1 (1 µM) with L-Phe-AMS **4** and L-Pro-AMS **5** (100 µM from a 10 mM stock in DMSO) for 10 min at room temperature, respectively. In all experiments total DMSO concentration was kept at 2.2%. After 10 min at room temperature, these samples were irradiated at 365 nm for 30 min on ice. To initiate the click reaction, rhodamine (Rh)-azide, TCEP, TBTA ligand, and CuSO<sub>4</sub> were added to provide final concentrations of 100 µM, 1 mM, 100 µM, and 1 mM, respectively. After 1 h at room temperature, 5× SDS-loading buffer (strong reducing) was added and the samples were heated at 95 °C for 5 min. Samples were separated by 1D SDS-PAGE and fluorescent gel visualization was performed using a Typhoon 9410 Gel and Blot Imager (GE Healthcare).

**Ultraviolet Photolysis Time Studies:** Recombinant GrsA (1 µM) and TycB1 (1 µM) were treated with probes **1** and **2** (1 µM from a 100 µM stock in DMSO; final DMSO concentration of 2.2%) in assay buffer, respectively. After 10 min at room temperature, these samples were irradiated at 365 nm for the indicated time (0–60 min) on ice, reacted with Rh-azide, and subjected to SDS-PAGE. Fluorescent gel visualization was performed using a Typhoon 9410 Gel and Blot Imager (GE Healthcare).

**Limit of Detection of GrsA and TycB1 Labeling:** Recombinant GrsA (1–500 fmol) and TycB1 (1–500 fmol) were treated with probes **1** and **2** (1 µM from a 100 µM stock in DMSO; final DMSO concentration of 2.2%) in assay buffer, respectively. After 10 min at room temperature, these samples were irradiated at 365 nm for

30 min on ice and reacted with Rh-azide for 1 h at room temperature. Reactions were treated with 5× SDS-loading buffer (strong reducing) and subjected to SDS-PAGE. Fluorescent gel visualization was performed using a Typhoon 9410 Gel and Blot Imager (GE Healthcare).

**Comparing the Labeling Property with GrsA, TycB1, AusA1, and BSA:** For GrsA (A: L-Phe), TycB1 (A: L-Pro), AusA1 (A: L-Val), and BSA labeling experiments, probes **1** and **2** (1 μM) were individually added to a 46 μL reaction containing GrsA (1 μM), TycB1 (1 μM), AusA1 (1 μM), BSA (1 μM), and assay buffer. For inhibition studies, GrsA (1 μM), TycB1 (1 μM), and AusA1 (1 μM) were pre-incubated with L-Phe-AMS **4**, L-Pro-AMS **5**, and L-Val-AMS **6** (100 μM) for 10 min at room temperature, respectively. In all experiments, the total DMSO concentration was kept at 2.2%. After 10 min at room temperature, these samples were irradiated at 365 nm for 30 min on ice, reacted with Rh-azide for 1 h at room temperature, and separated by gel electrophoresis. Fluorescent gel visualization was performed using a Typhoon 9410 Gel and Blot Imager (GE Healthcare).

**GrsA Labeling of *A. migulanus* ATCC 9999 Proteomes:** *Aneurinibacillus migulanus* proteome (1.4 mg/mL) was treated with probe **1** (1 μM from a 100 μM stock in DMSO) in 20 mM Tris (pH 8.0), 1 mM MgCl<sub>2</sub>, 1 mM TCEP, 0.05% Igepal CA-630, 0.2 mg/mL lysozyme, and protease inhibitor cocktail. Inhibition studies were performed by pre-incubation of *A. migulanus* proteome (1.4 mg/mL) with L-Phe-AMS **4** (100 μM from a 10 mM stock in DMSO) for 10 min at room temperature. In all experiments, the total DMSO concentration was kept at 2.2%. After 10 min at room temperature, these samples were irradiated at 365 nm for 30 min on ice, reacted with Rh-azide for 1 h at room temperature, and separated by gel electrophoresis. Fluorescent gel visualization was performed using a Typhoon 9410 Gel and Blot Imager (GE Healthcare).

**GrsB Labeling of *A. migulanus* DSM 5759 Proteomes:** *Aneurinibacillus migulanus* proteome (1.5 mg/mL) was individually treated with probes **2** and **3** (1 μM from a 100 μM stock in DMSO) in 20 mM Tris (pH 8.0), 1 mM MgCl<sub>2</sub>, 1 mM TCEP, 0.05% Igepal CA-630, 0.2 mg/mL lysozyme, and protease inhibitor cocktail. For inhibition studies, *A. migulanus* proteome (1.5 mg/mL) was individually pre-incubated with L-Pro-AMS **5** and L-Orn-AMS **7** (100 μM from a 10 mM stock in DMSO) for 10 min at room temperature. In all experiments, the total DMSO concentration was kept at 2.2%. After 10 min at room temperature, these samples were irradiated at 365 nm for 5 min and reacted with Rh-azide for 1 h at room temperature. Reactions were treated with 5× SDS-loading buffer (strong reducing) and subjected to SDS-PAGE. Fluorescent gel visualization was performed using a Typhoon 9410 Gel and Blot Imager (GE Healthcare).

**Labeling of Individual A Domains and Profiling of A Domain Functions in Native Proteomic Environments:** In order to investigate GrsA labeling, *A. migulanus* ATCC 9999 proteome (1.5 mg/mL) was individually treated with inhibitors **4–8** (100 μM from a 10 mM stock in DMSO) in 20 mM Tris (pH 8.0), 1 mM MgCl<sub>2</sub>, 1 mM TCEP, 0.05% Igepal CA-630, 0.2 mg/mL lysozyme, and protease inhibitor cocktail. These samples were incubated for 10 min at room temperature and subsequently treated with probe **1** (1 μM from a 100 μM stock in DMSO). In all experiments, the total DMSO concentration was kept at 2.2%. After 10 min at room temperature, the samples were exposed to ultraviolet light for 30 min on ice and treated with Rh-azide for 1 h at room temperature. To evaluate the labeling of GrsB, the *A. migulanus* DSM 5759 proteome (1.5 mg/mL) was individually treated with inhibitors **4–8** (100 μM from a 10 mM stock in DMSO) in 20 mM Tris (pH 8.0), 1 mM MgCl<sub>2</sub>, 1 mM TCEP, 0.05% Igepal CA-630, 0.2 mg/mL lysozyme, and protease inhibitor cocktail. These samples were incubated for 10 min at room temperature and treated with individual members of probes **2** and **3** (1 μM from a 100 μM stock in DMSO). In all reactions, the DMSO concentrations were maintained at a level of 2.2%. After 10 min at room temperature, these samples were irradiated at 365 nm for 5 min on ice and reacted with Rh-azide for 1 h at room temperature. Reactions were treated with 5× SDS-loading buffer (strong reducing) and subjected to SDS-PAGE. Fluorescent gel visualization was

performed using a Typhoon 9410 Gel and Blot Imager (GE Healthcare).

**Mass Spectroscopic Analysis, 1D SDS-PAGE, and In-gel Digestion:** The proteins were separated by 1D SDS-PAGE by using 6% wide range gels (Nacalai tesque) and visualized using Sil-best stain one (Nacalai tesque). The bands were excised, destained using destaining solution in the Silver Stain MS Kit (Wako Pure Chemical Industries, Ltd), and subjected to in-gel digestion with TPCK-treated trypsin in the digestion buffer (10 mM Tris-HCl, pH 8.0 and 0.05% decyl glucoside) for 12 h at 37 °C.

**LC-MS/MS analysis:** The digest mixture was separated using a nanoflow LC (Easy nLC, Thermo Fisher Scientific) on NTCC analytical column (C-18 reverse-phase column,  $\phi$  0.075  $\times$  100 mm, 3  $\mu$ m bead size, Nikkyo Technos Co., Ltd.). The buffer compositions were as follows. Buffer A was composed of 100% H<sub>2</sub>O and 0.1% formic acid; buffer B was composed of 100% CH<sub>3</sub>CN and 0.1% formic acid. Peptide were eluted from the C-18 column using a linear gradient of 35–100% buffer B over 10 min at a flow rate of 300 nL/min and subjected to a Q-Exactive mass spectrometer (Thermo Fisher Scientific) with a nanospray ion source using data-dependent TOP10 MS/MS method in the mass range of  $m/z$  = 300–500 and  $m/z$  = 500–1500. Peptide identifications were made using MS/MS Ions Search in MASCOT program v2.3 (Matrix Science Inc., Boston, MA).

## References

1. Wilson, D. J.; Aldrich, C. C. A continuous kinetic assay for adenylation enzyme activity and inhibition. *Anal. Chem.* **2010**, 404, 56-63.
2. Ishikawa, F.; Kakeya, H. Specific enrichment of nonribosomal peptide synthetase module by an affinity probe for adenylation domains. *Bioorg. Med. Chem. Lett.* **2014**, 24, 865-869.
3. Wheatley, B. M. M.; Keay, B. A. Use of deuterium labeling studies to determine the stereochemical outcome of palladium migrations during an asymmetric intermolecular heck reaction. *J. Org. Chem.* **2007**, 72, 7253-7259.
4. Neres, J.; Labello, N. P.; Somu, R. V.; Boshoff, H. I.; Wilson, D. J.; Vannada, J.; Chen, L.; Barry, C. E., III; Bennett, E. M.; Aldrich, C. C. Inhibition of siderophore biosynthesis in *Mycobacterium tuberculosis* with nucleoside bisubstrate analogues: Structure-activity relationships of the nucleobase domain of 5'-O-[N-(salicyl)sulfamoyl]adenosine. *J. Med. Chem.* **2008**, 51, 5349-5370.
5. Gottlieb, H. E.; Kotlyar, V.; Nudelman, A. NMR chemical shifts of common laboratory solvents as trace impurities. *J. Org. Chem.* **1997**, 62, 7512-7515.
6. Still, W. C.; Kahn, A.; Mitra, A. Rapid chromatographic technique for preparative separations with moderate resolution. *J. Org. Chem.* **1978**, 43, 2923-2925.
7. Stachelhaus, T.; Hüser, A.; Marahiel, M. A. Biochemical characterization of peptidyl carrier protein (PCP), the thiolation domain of multifunctional peptide synthetases. *Chem. Biol.* **1996**, 3, 913-921.
8. Mootz, H. D.; Marahiel, M. A. The tyrocidine biosynthesis operon of *Bacillus brevis*: complete nucleotide sequence and biochemical characterization of functional internal adenylation domains. *J. Bacteriol.* **1997**, 179, 6843-6850.

9. Stachelhaust, T.; Mootz, H.; Bergendahl, V.; Marahiel, M. A. Peptide bond formation in nonribosomal peptide biosynthesis. *J. Biol. Chem.* **1998**, *273*, 22773-22781.
10. Bradford, M. M. A rapid and sensitive method for the quantitation of microgram quantities of protein utilizing the principle of protein-dye binding. *Anal. Biochem.* **1976**, *72*, 248-254.
11. Augenstein, D. C.; Thrasher, K. D.; Sinskey, A. J., Wang, D. I. C. Optimization in the recovery of a labile intracellular enzyme. *Biotechnol. Bioeng.* **1974**, *16*, 1433-1447.

$^1\text{H-NMR}$  (500 MHz) and  $^{13}\text{C-NMR}$  (125 MHz) spectra of **S2b** in  $\text{CD}_3\text{OD}$

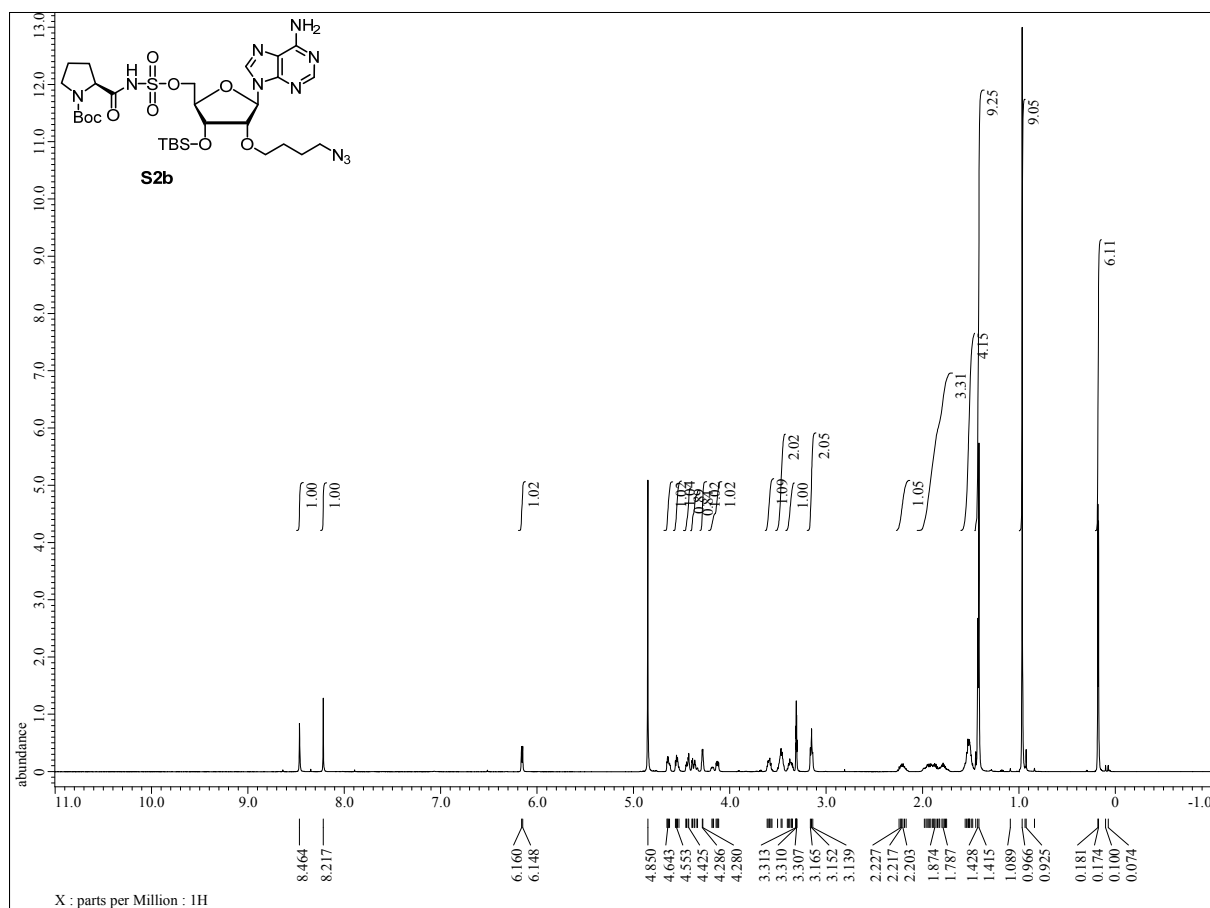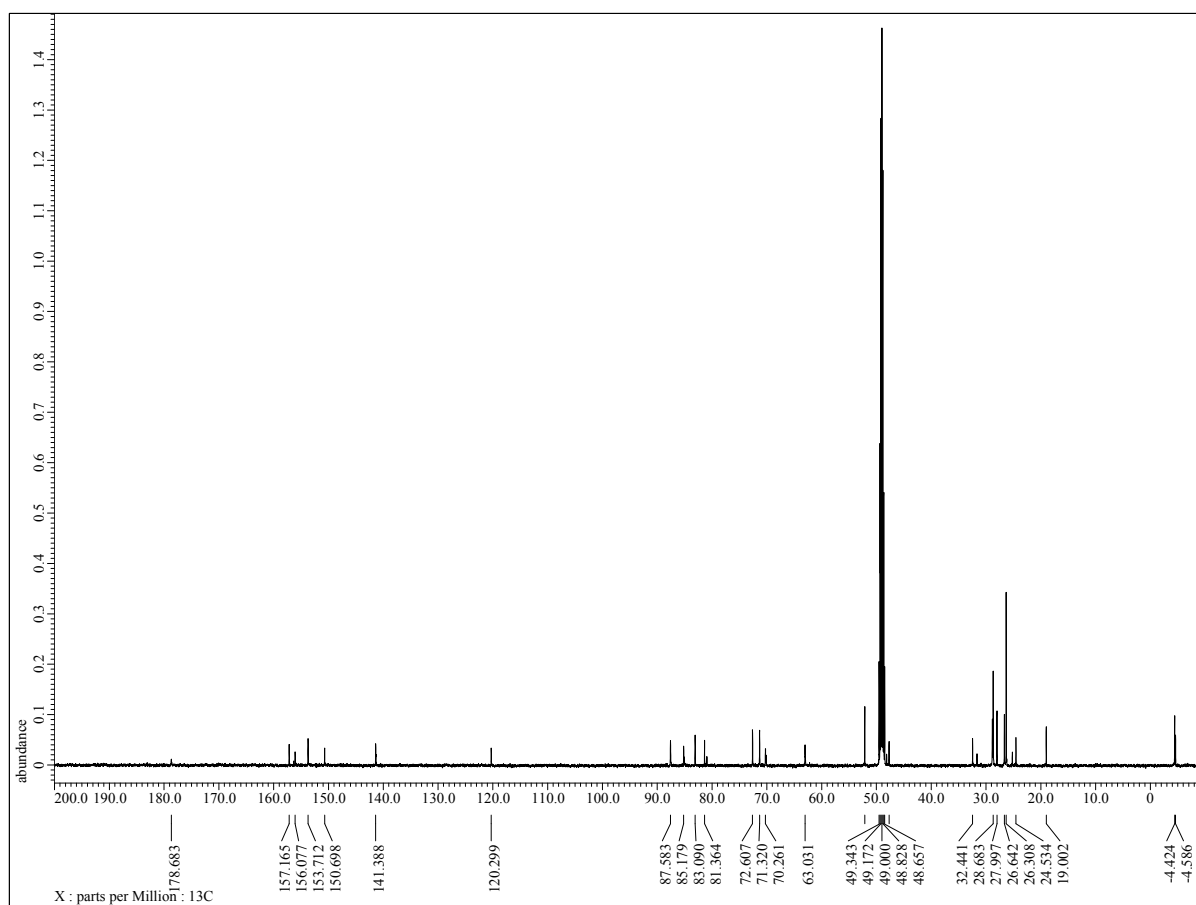

$^1\text{H-NMR}$  (500 MHz) and  $^{13}\text{C-NMR}$  (125 MHz) spectra of **S2c** in  $\text{CD}_3\text{OD}$

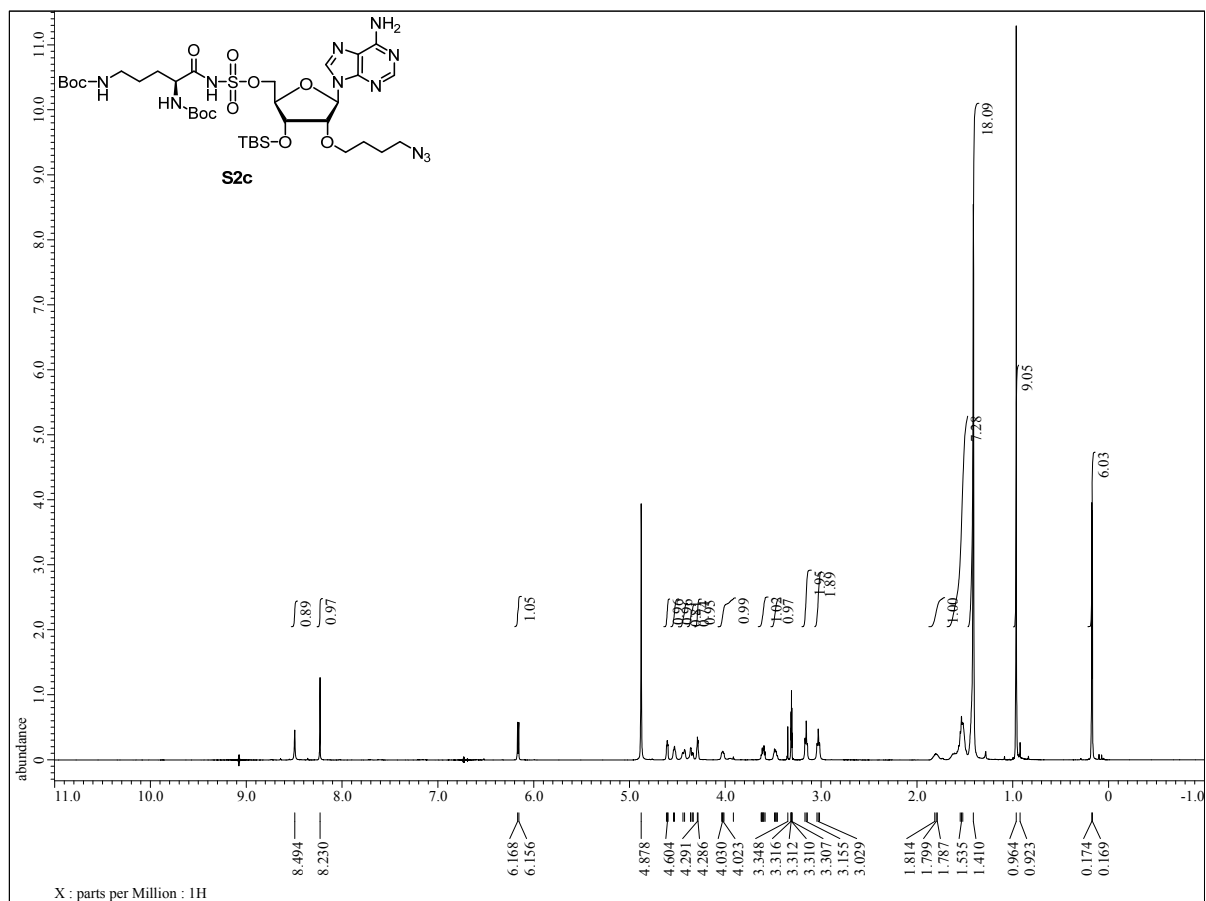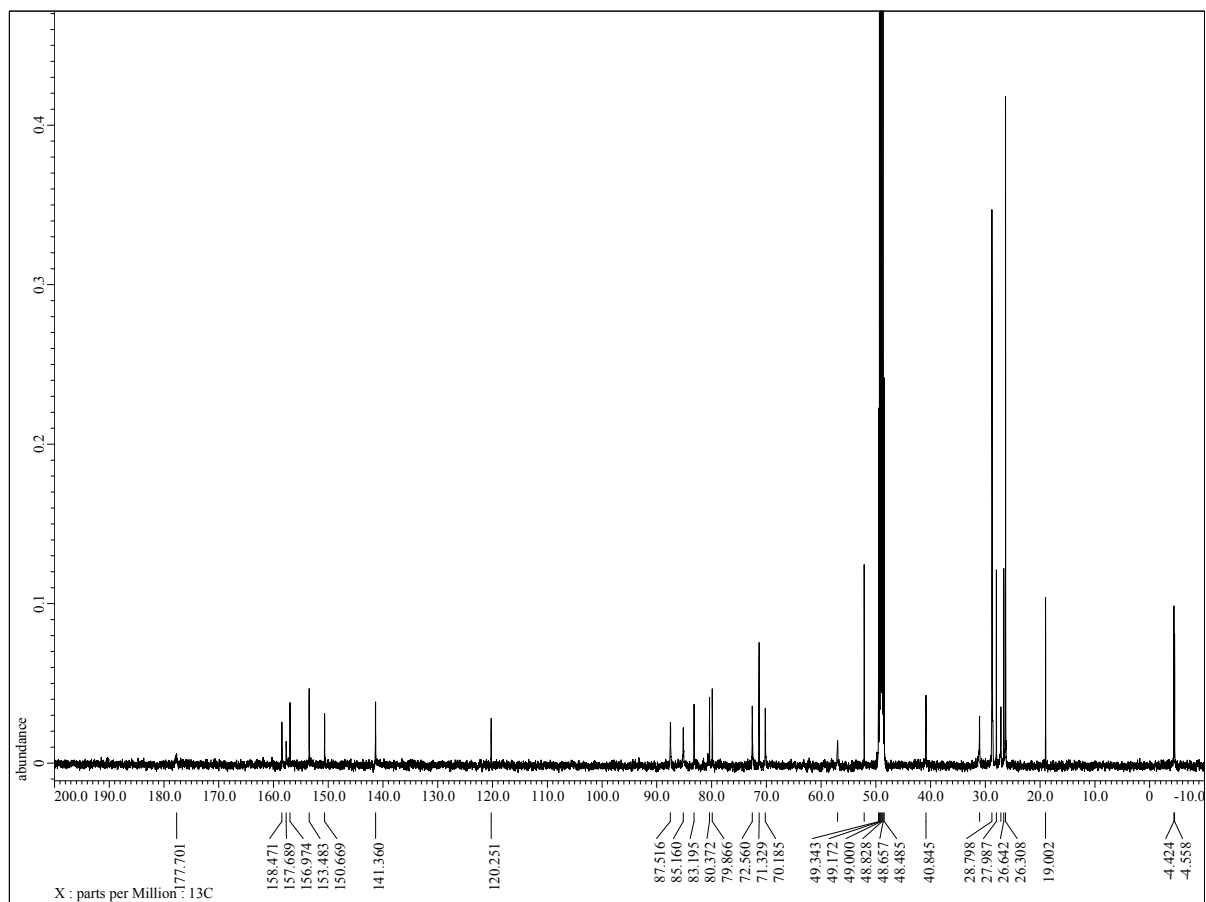

$^1\text{H}$ -NMR (500 MHz) and  $^{13}\text{C}$ -NMR (125 MHz) spectra of **S3b** in  $\text{CD}_3\text{OD}$

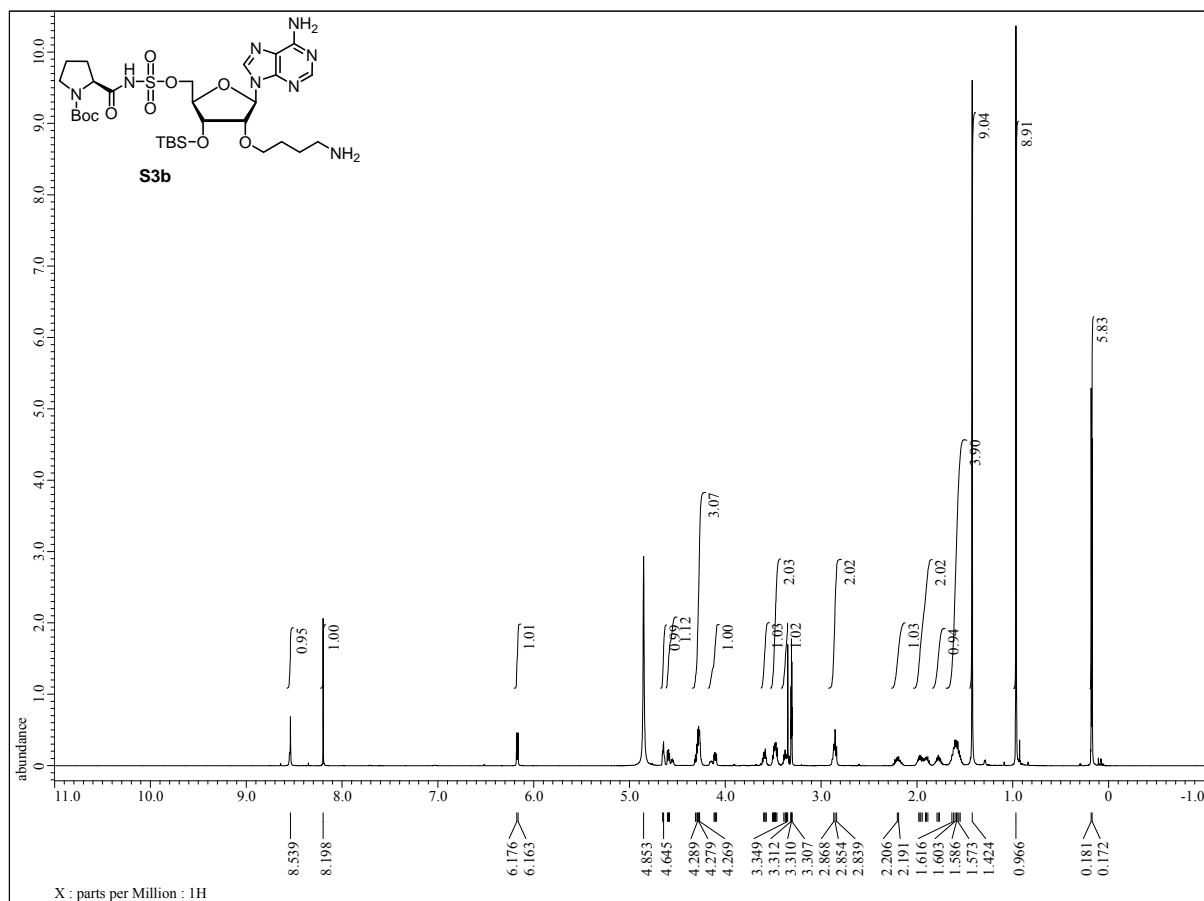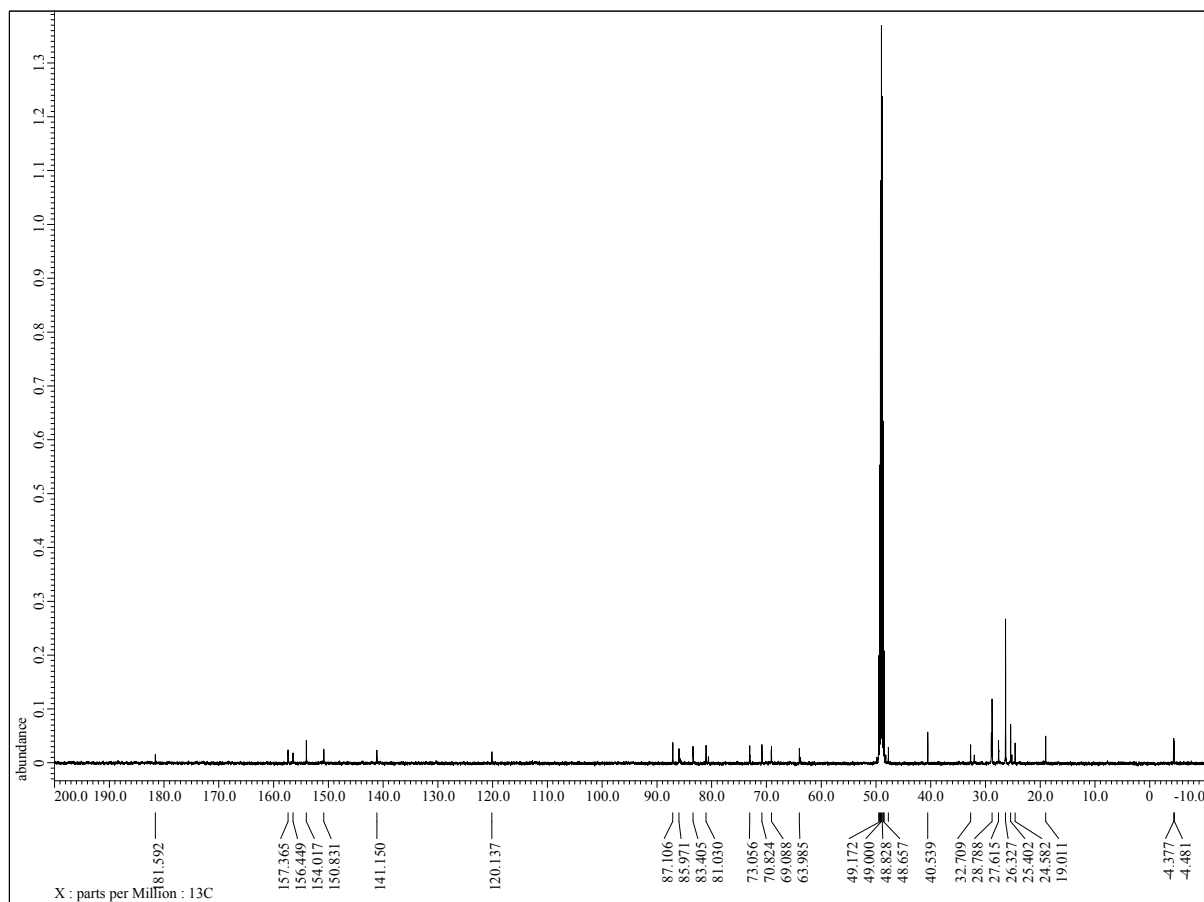



$^1\text{H-NMR}$  (500 MHz) and  $^{13}\text{C-NMR}$  (125 MHz) spectra of **S3c** in  $\text{CD}_3\text{OD}$

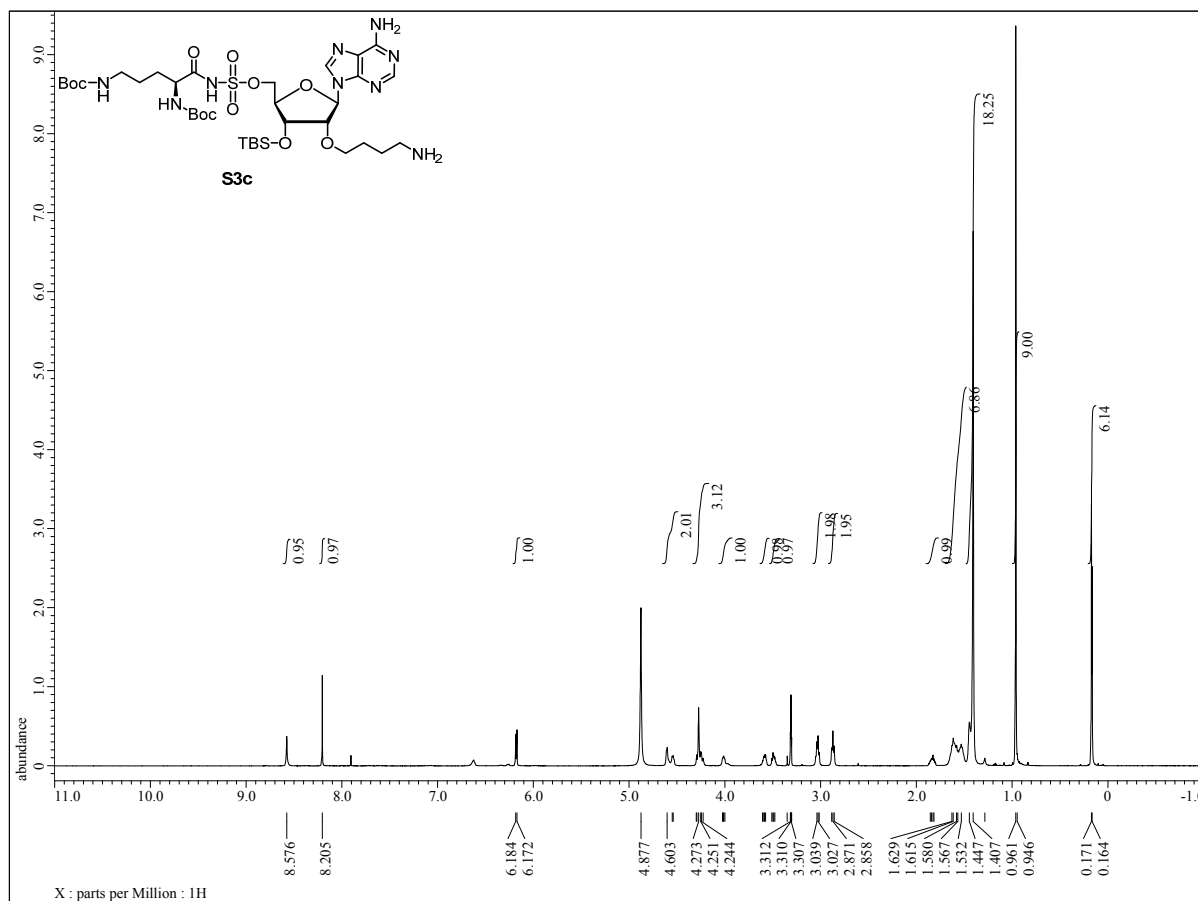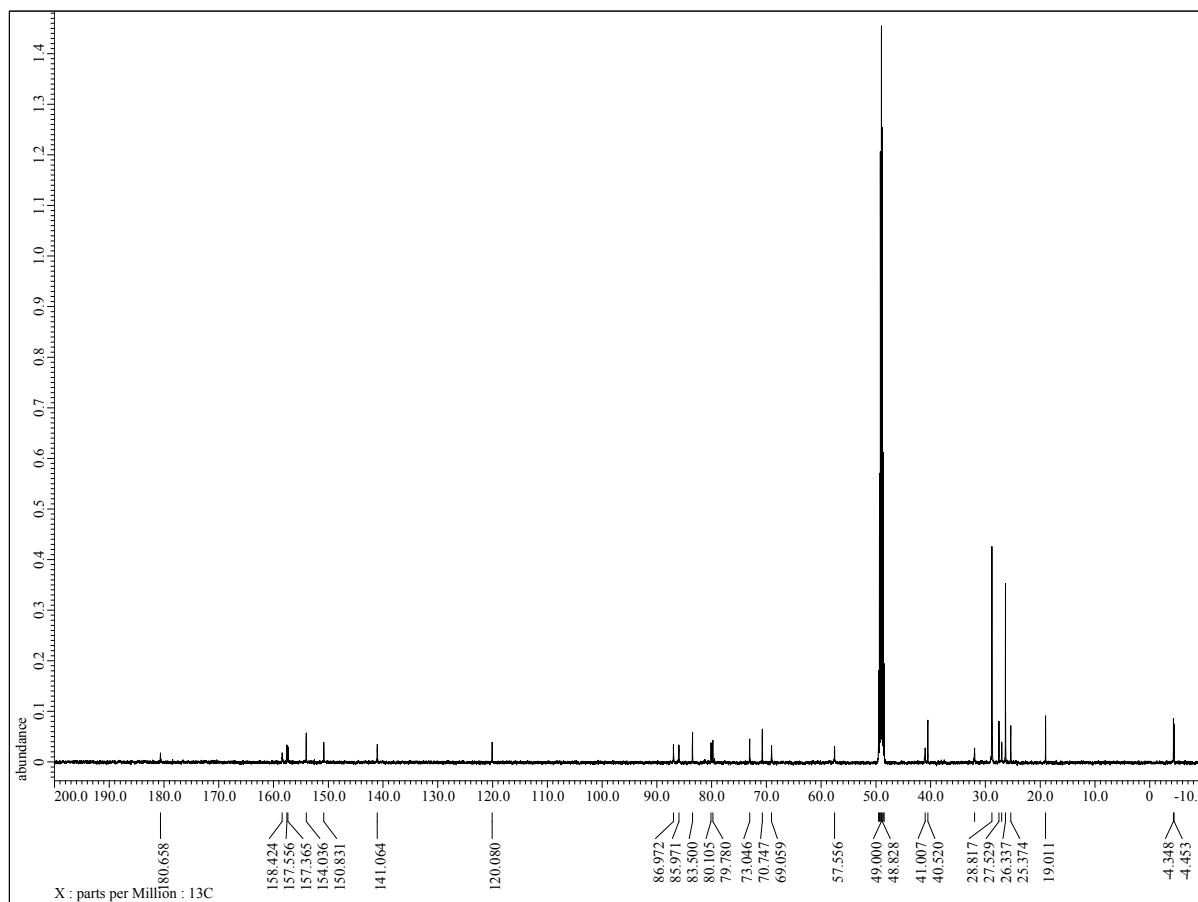

$^1\text{H-NMR}$  (500 MHz) and  $^{13}\text{C-NMR}$  (125 MHz) spectra of **S4a** in  $\text{CD}_3\text{OD}$

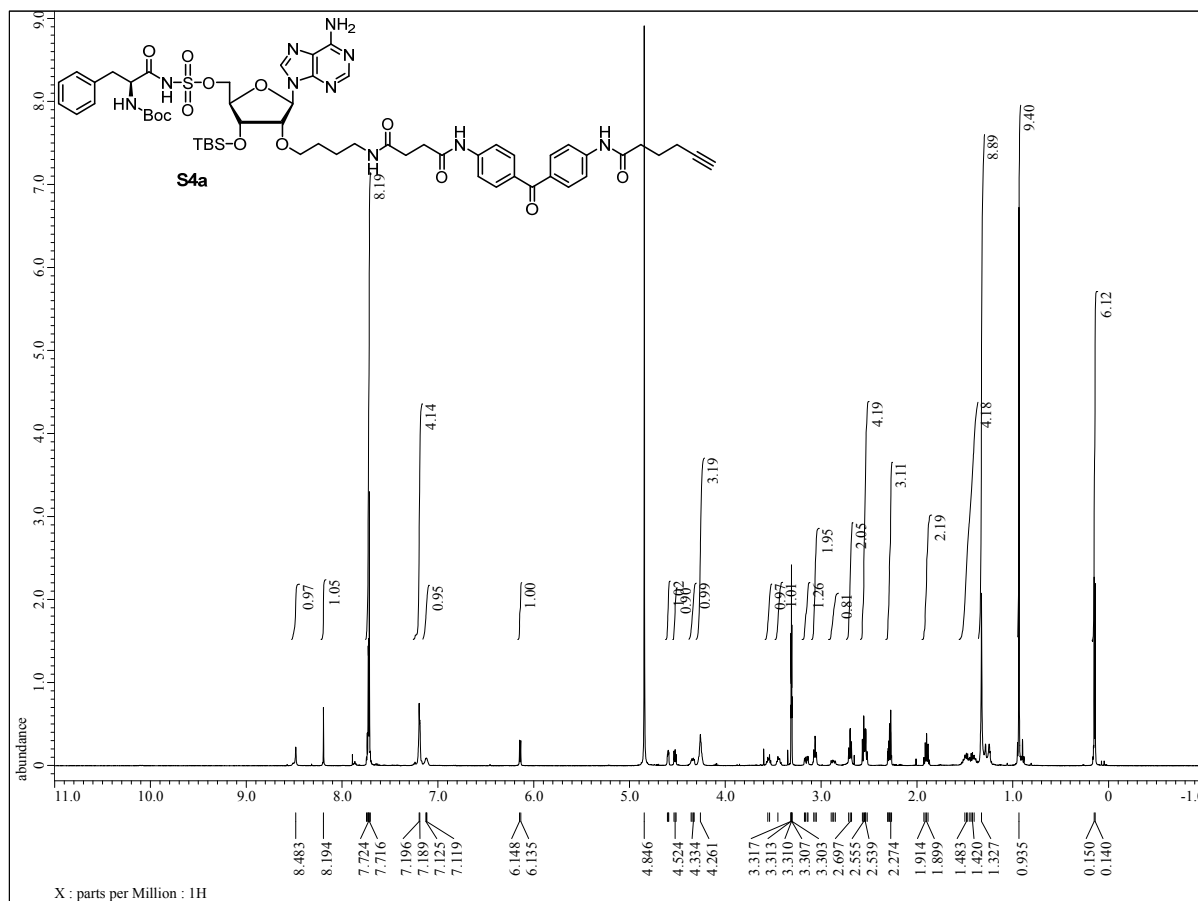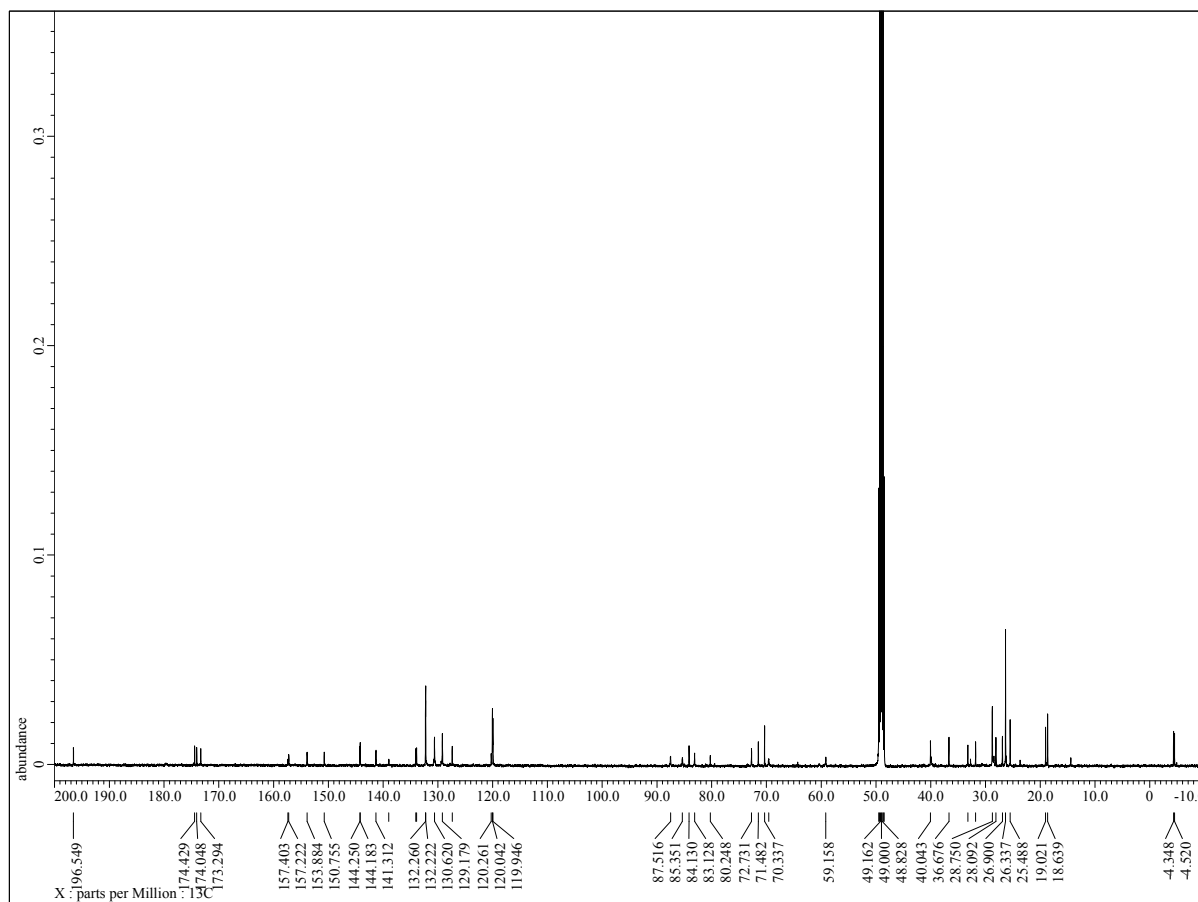

$^1\text{H-NMR}$  (500 MHz) and  $^{13}\text{C-NMR}$  (125 MHz) spectra of **S4b** in  $\text{CD}_3\text{OD}$

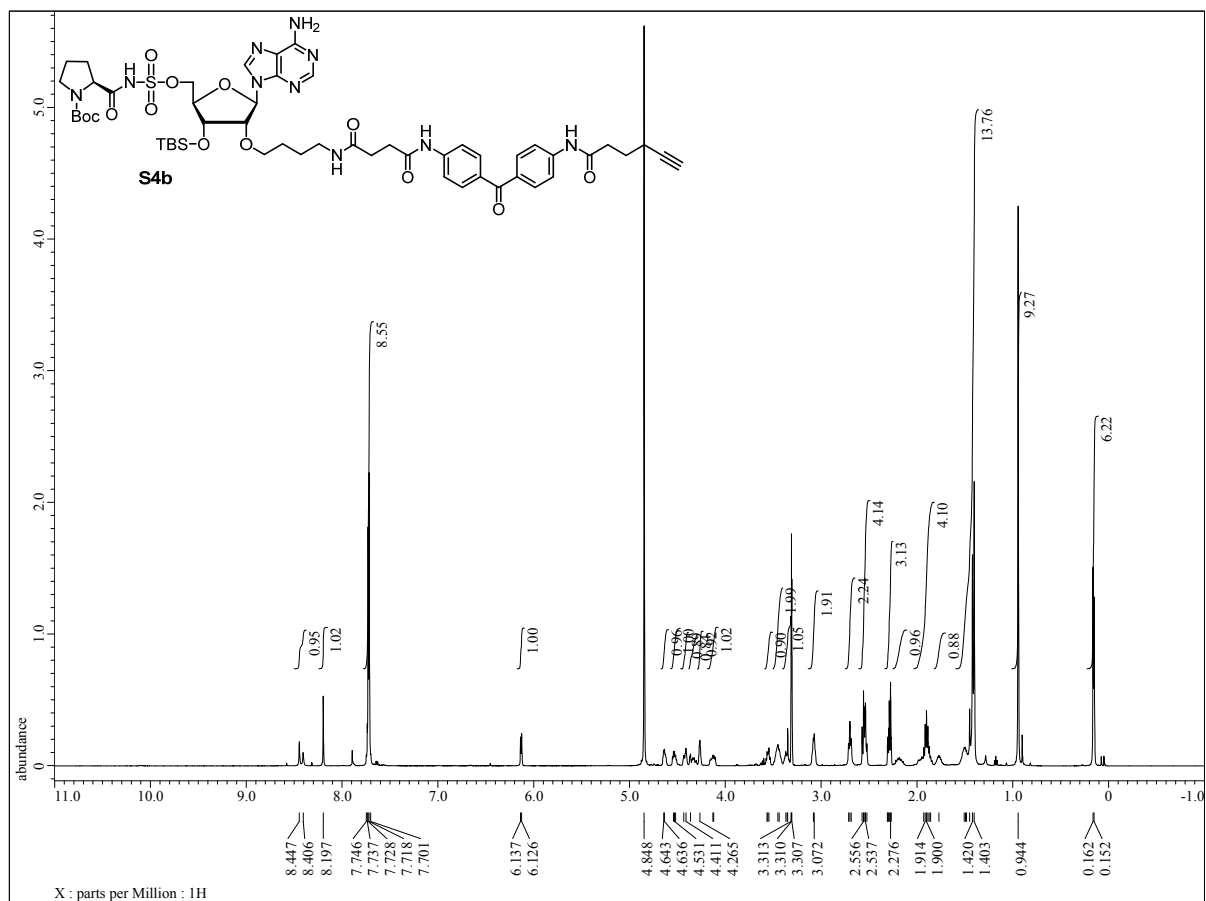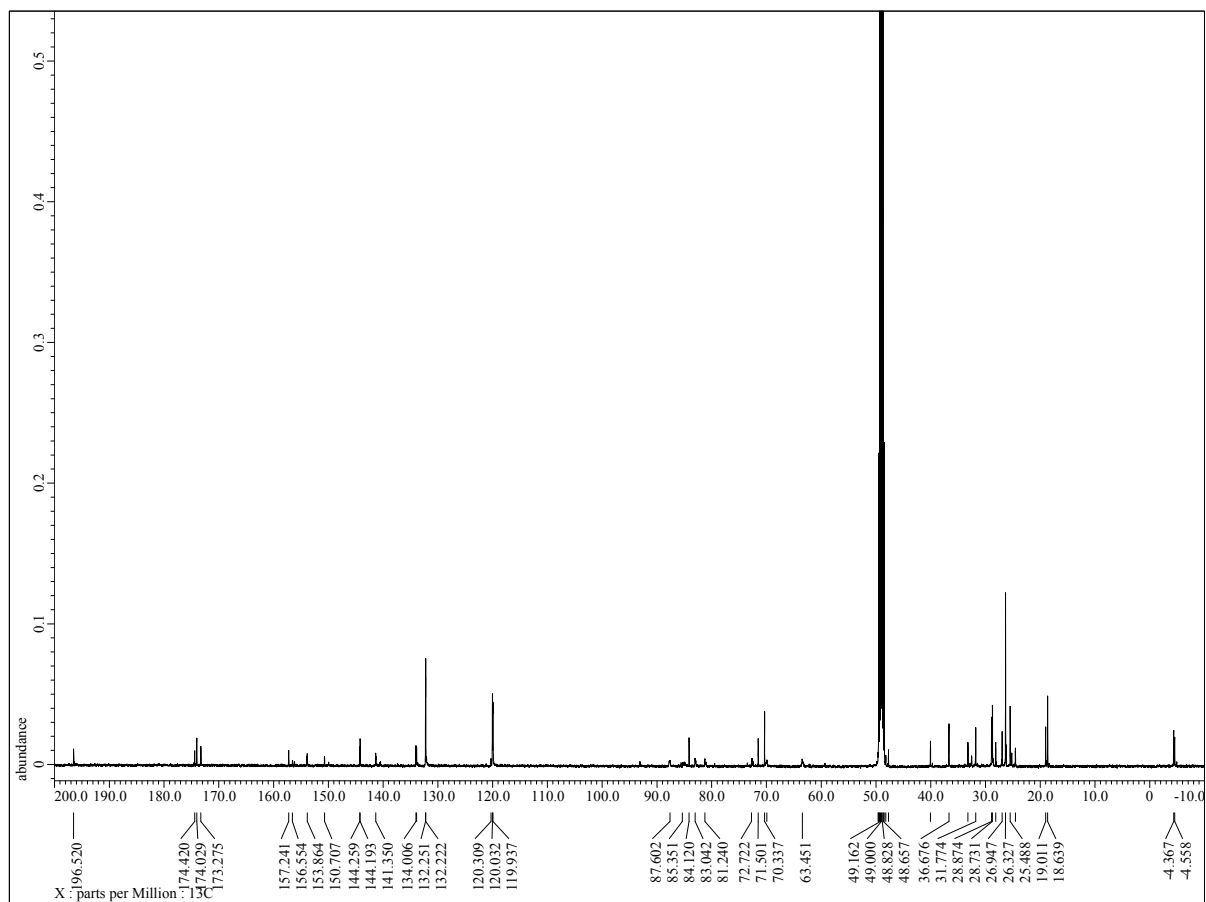

$^1\text{H-NMR}$  (500 MHz) and  $^{13}\text{C-NMR}$  (125 MHz) spectra of **S4c** in  $\text{CD}_3\text{OD}$

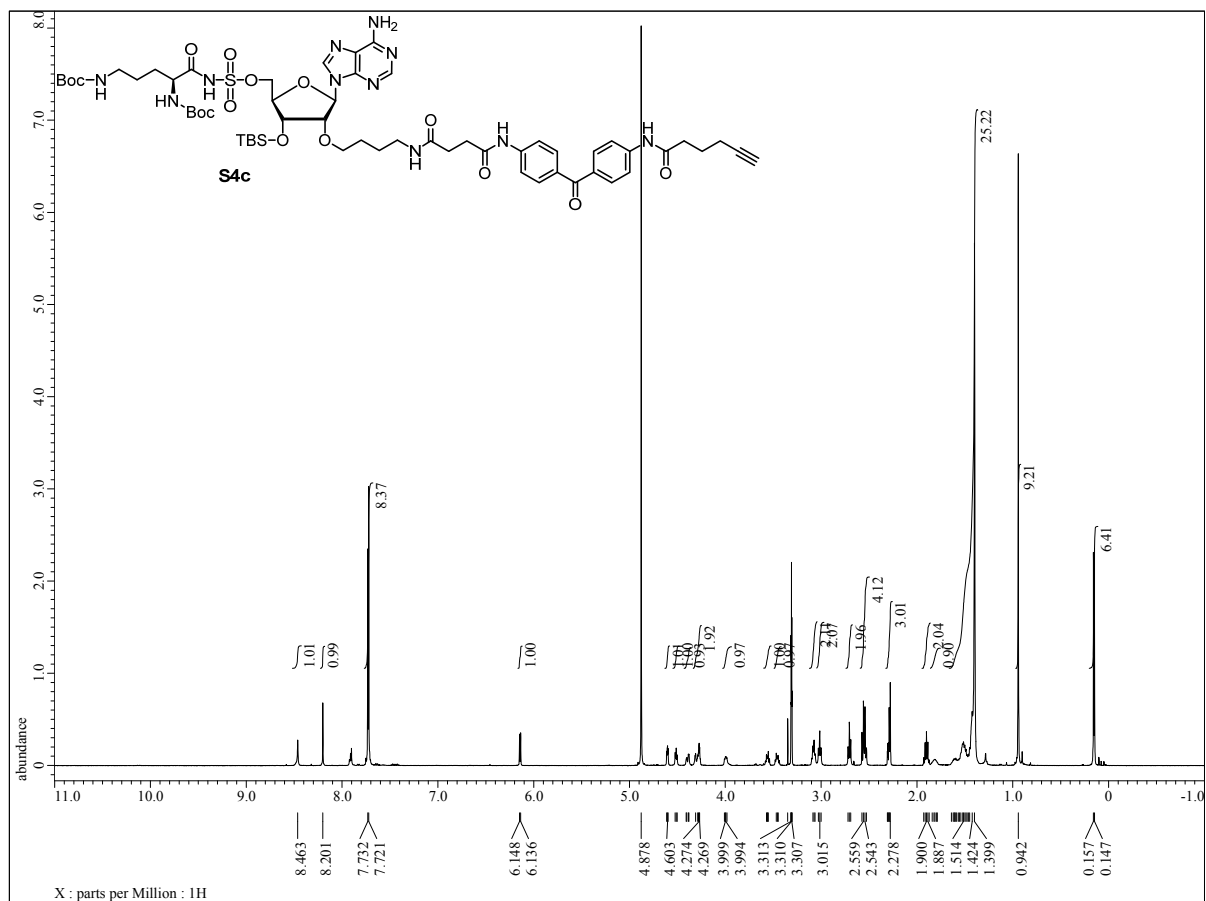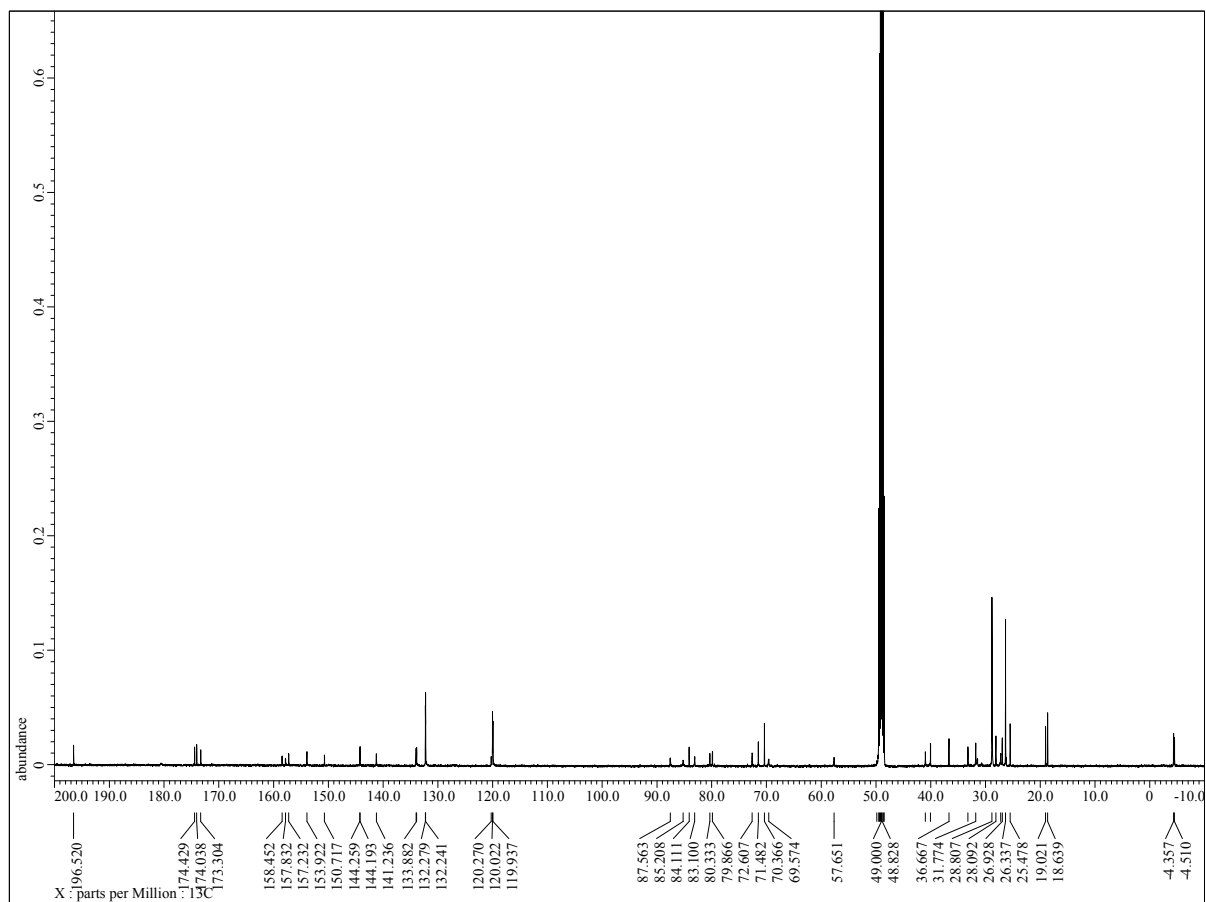

$^1\text{H-NMR}$  (500 MHz) and  $^{13}\text{C-NMR}$  (125 MHz) spectra of probe **1** in  $\text{CD}_3\text{OD}$

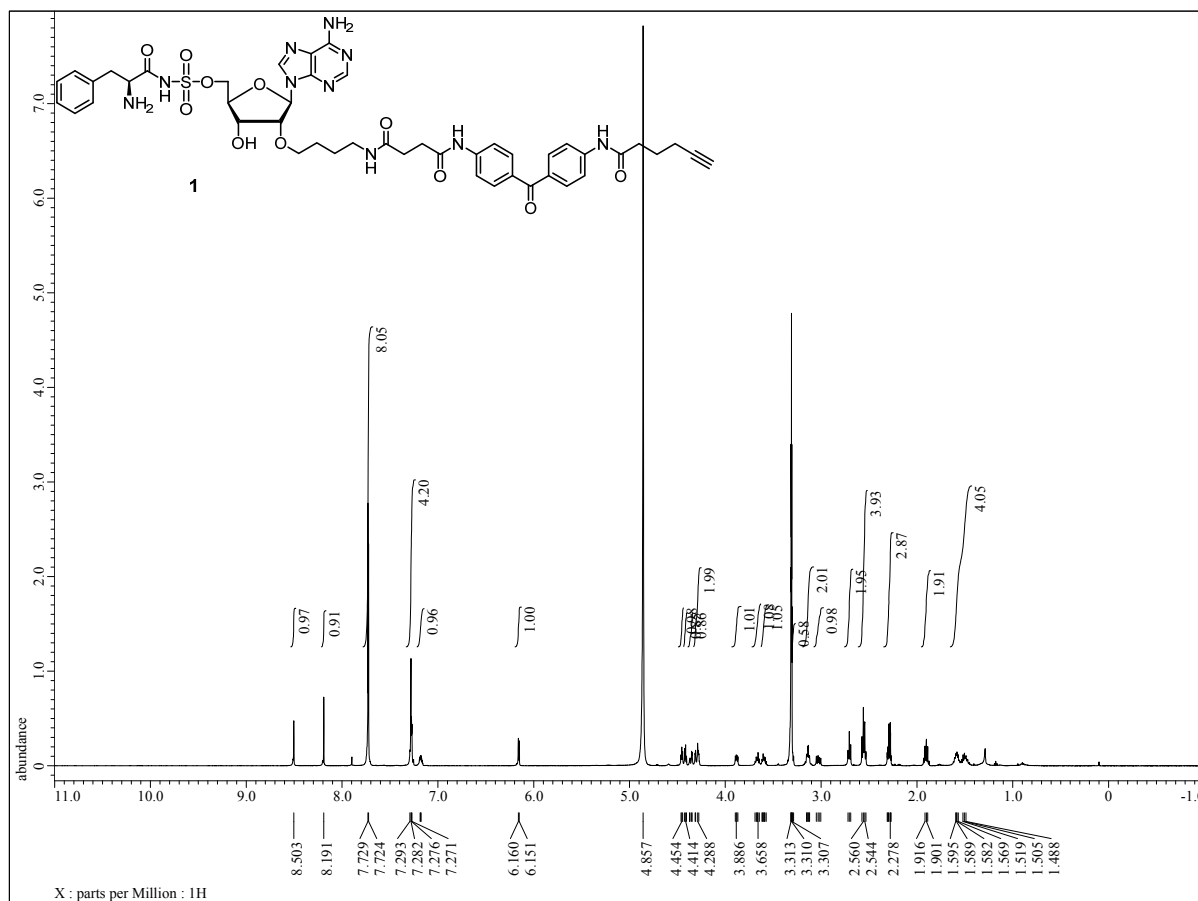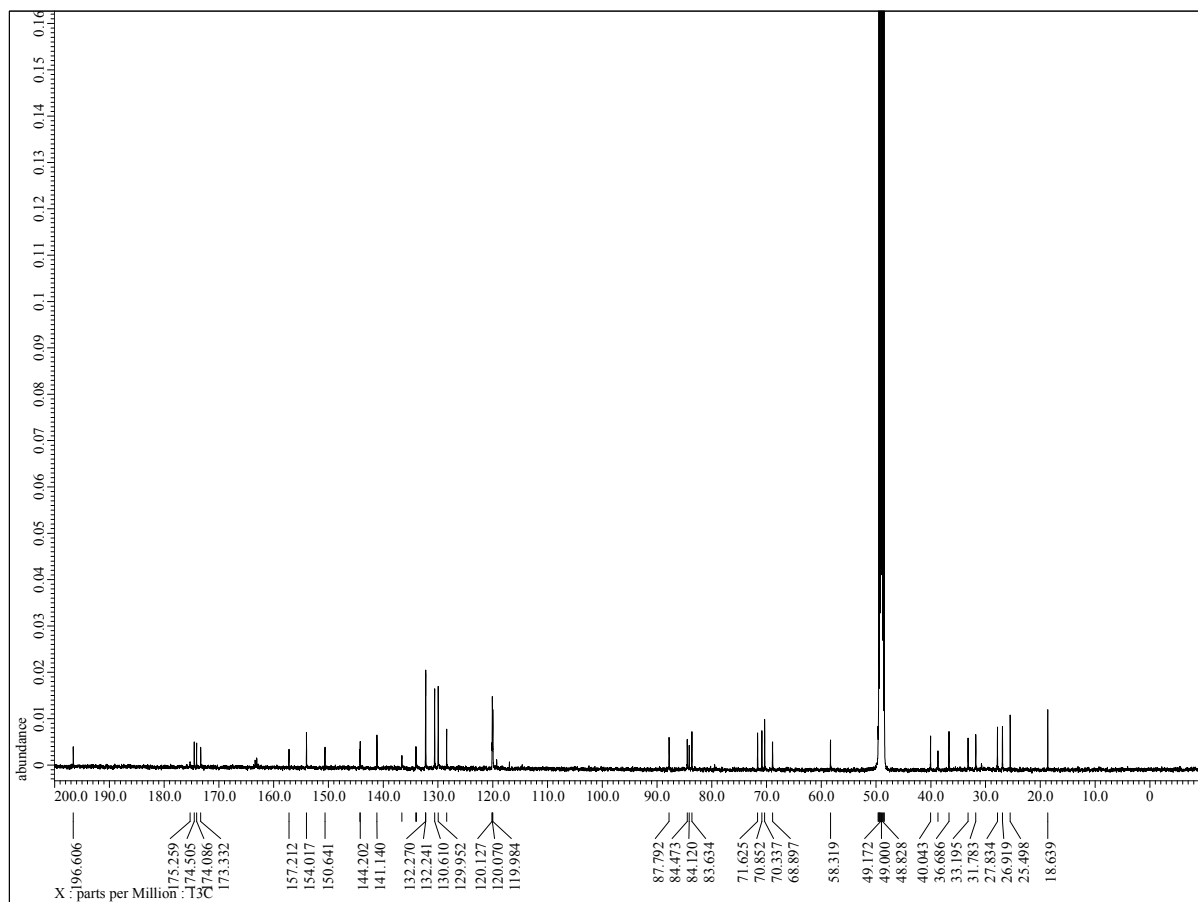

$^1\text{H-NMR}$  (500 MHz) and  $^{13}\text{C-NMR}$  (125 MHz) spectra of probe **2** in  $\text{CD}_3\text{OD}$

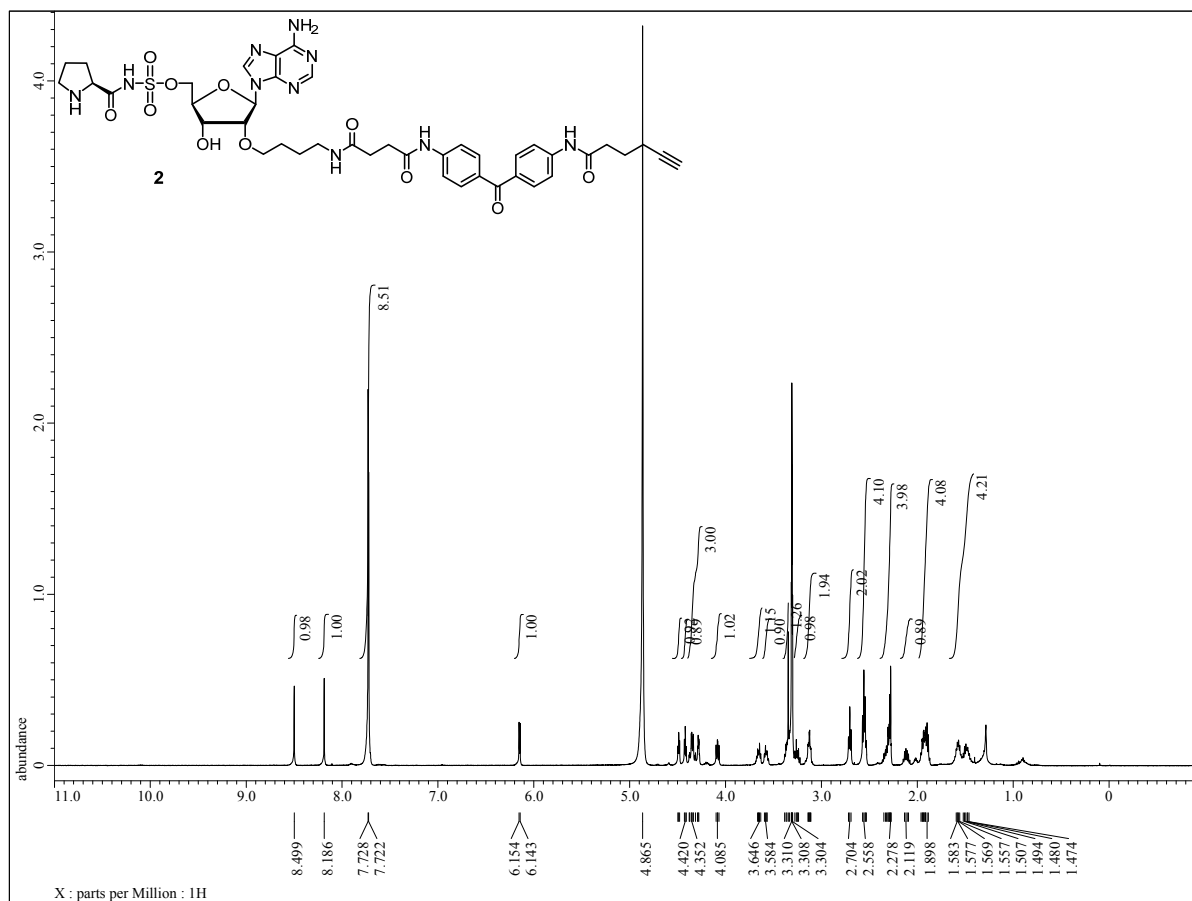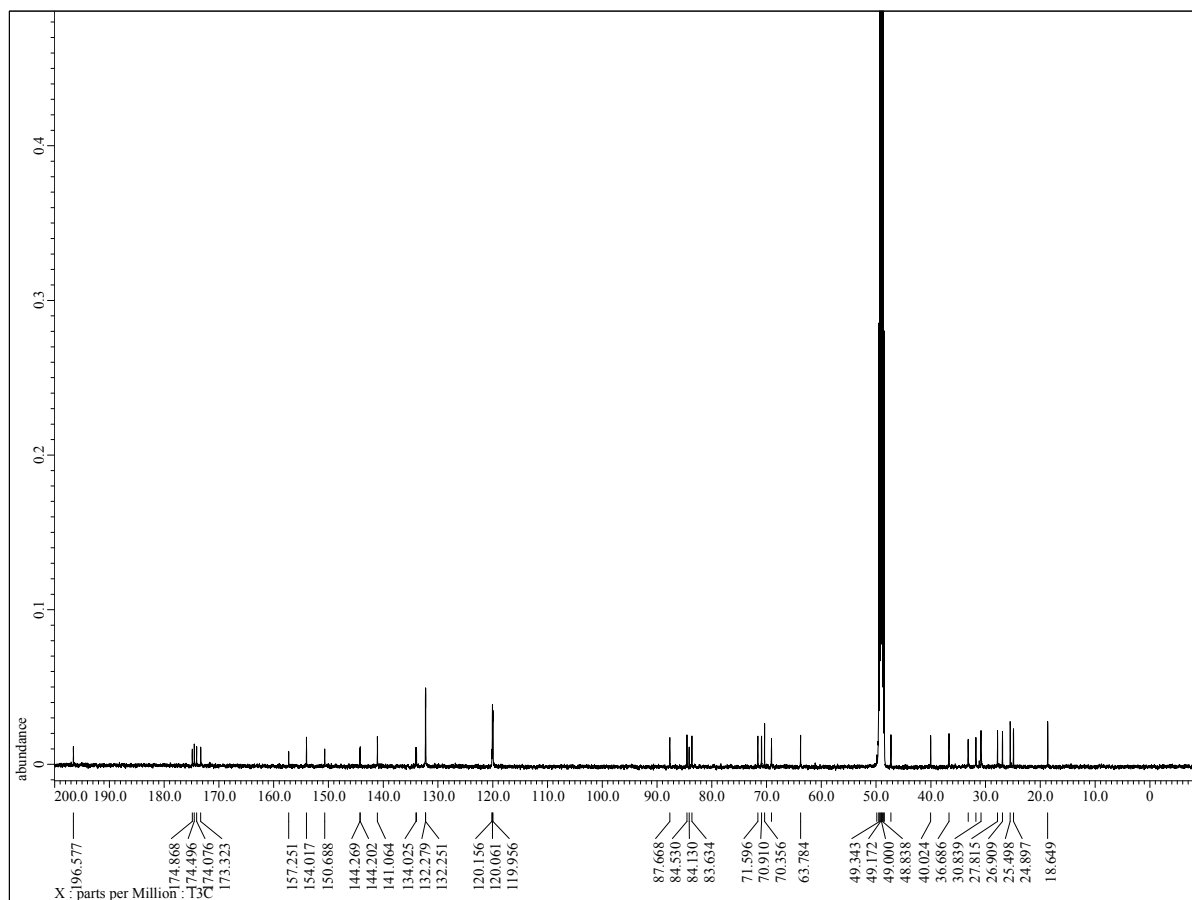

$^1\text{H-NMR}$  (500 MHz) and  $^{13}\text{C-NMR}$  (125 MHz) spectra of probe **3** in  $\text{CD}_3\text{OD}$

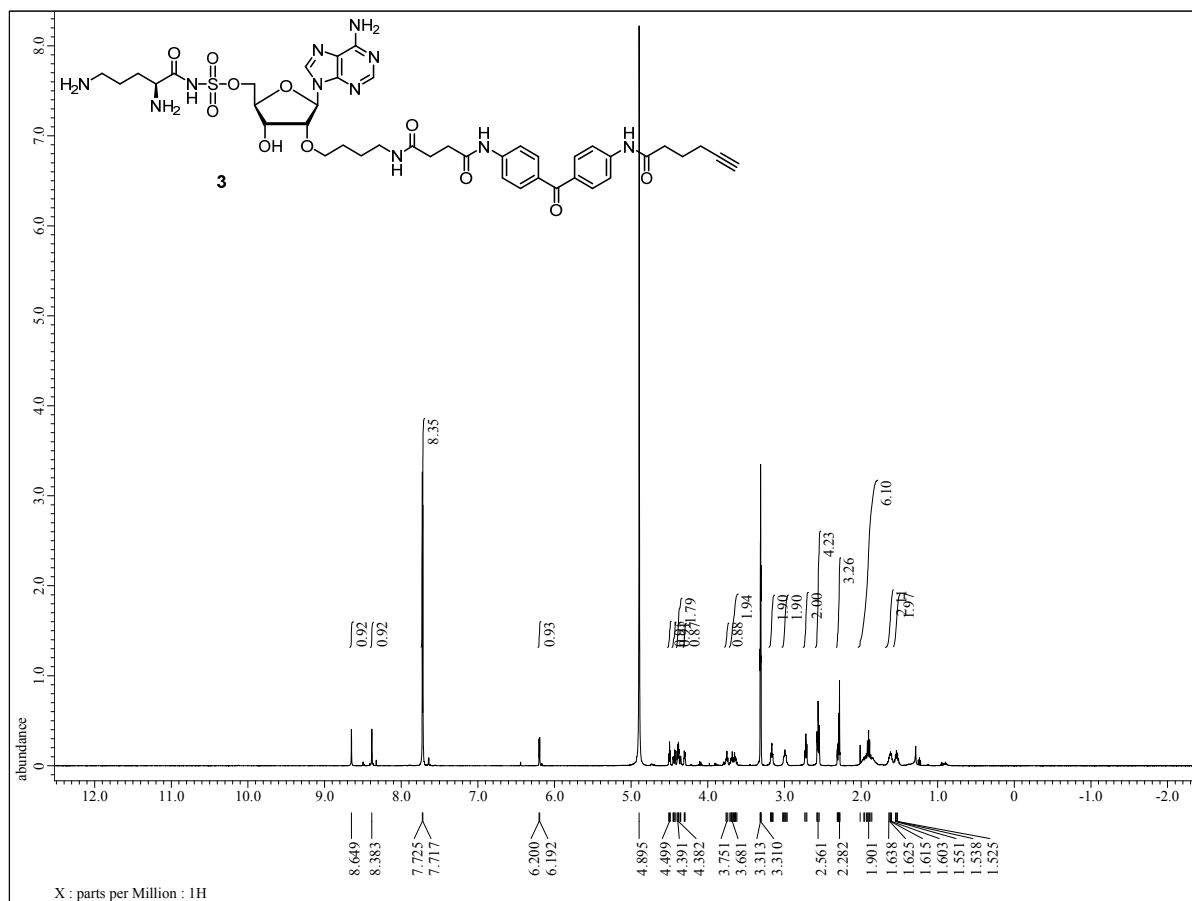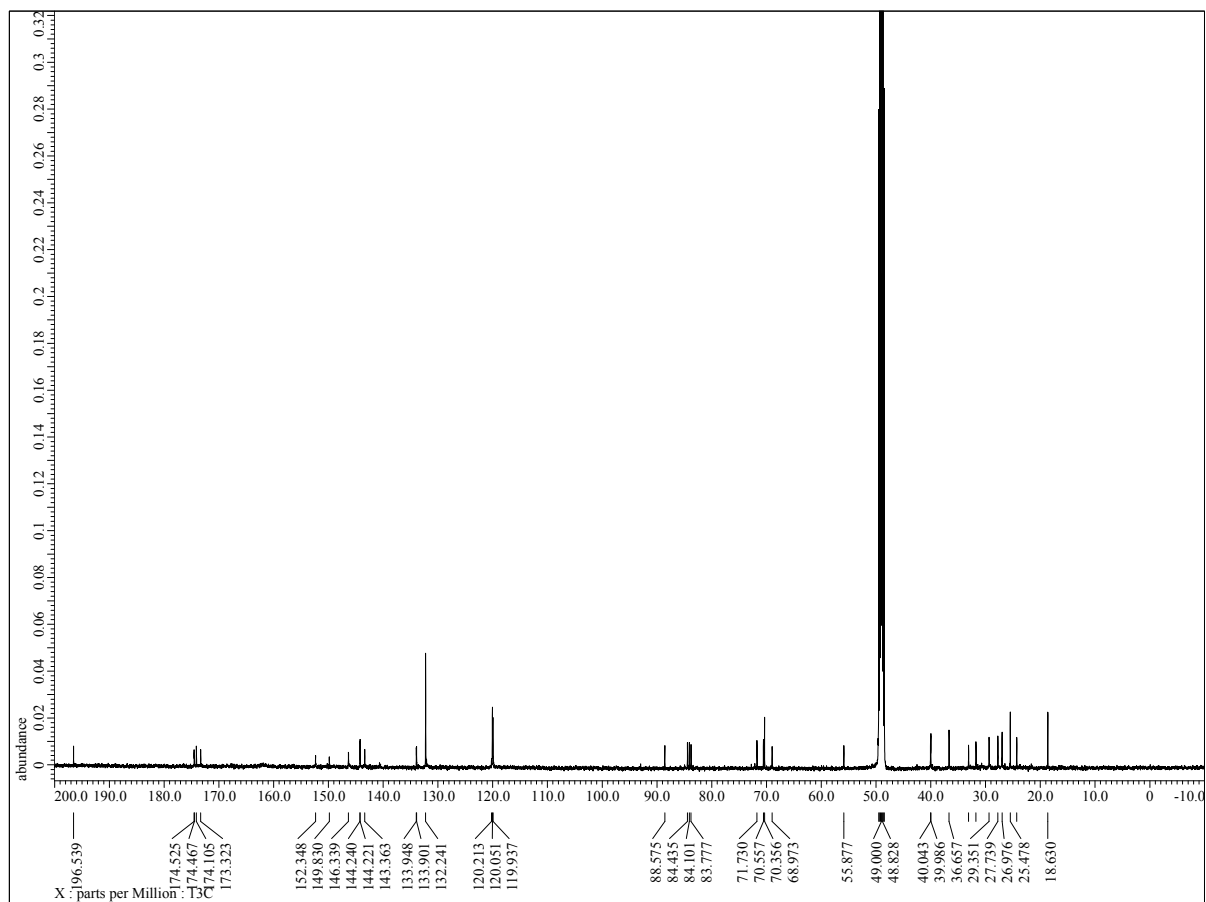

$^1\text{H-NMR}$  (500 MHz) and  $^{13}\text{C-NMR}$  (125 MHz) spectra of **S6** in  $\text{DMSO-}d_6$

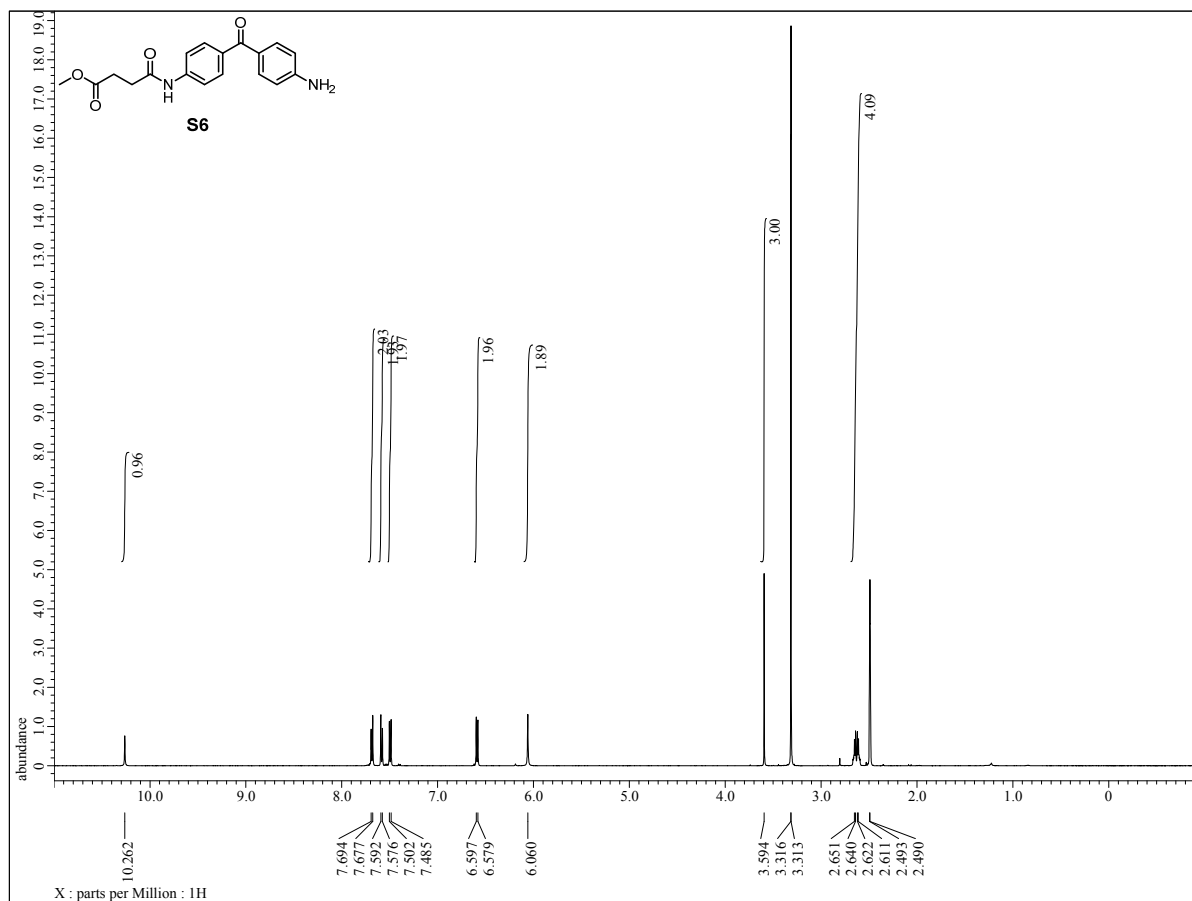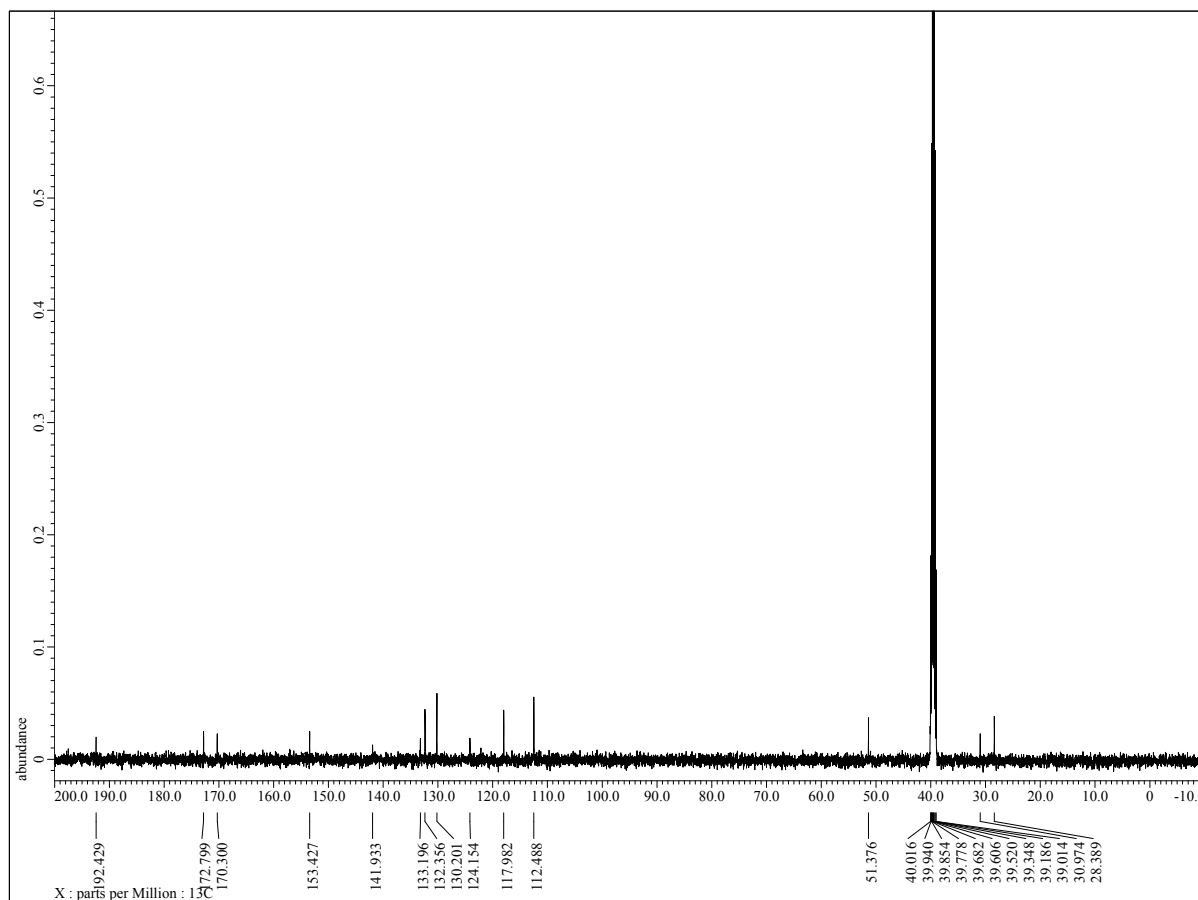



$^1\text{H-NMR}$  (500 MHz) and  $^{13}\text{C-NMR}$  (125 MHz) spectra of **S7** in  $\text{DMSO-}d_6$

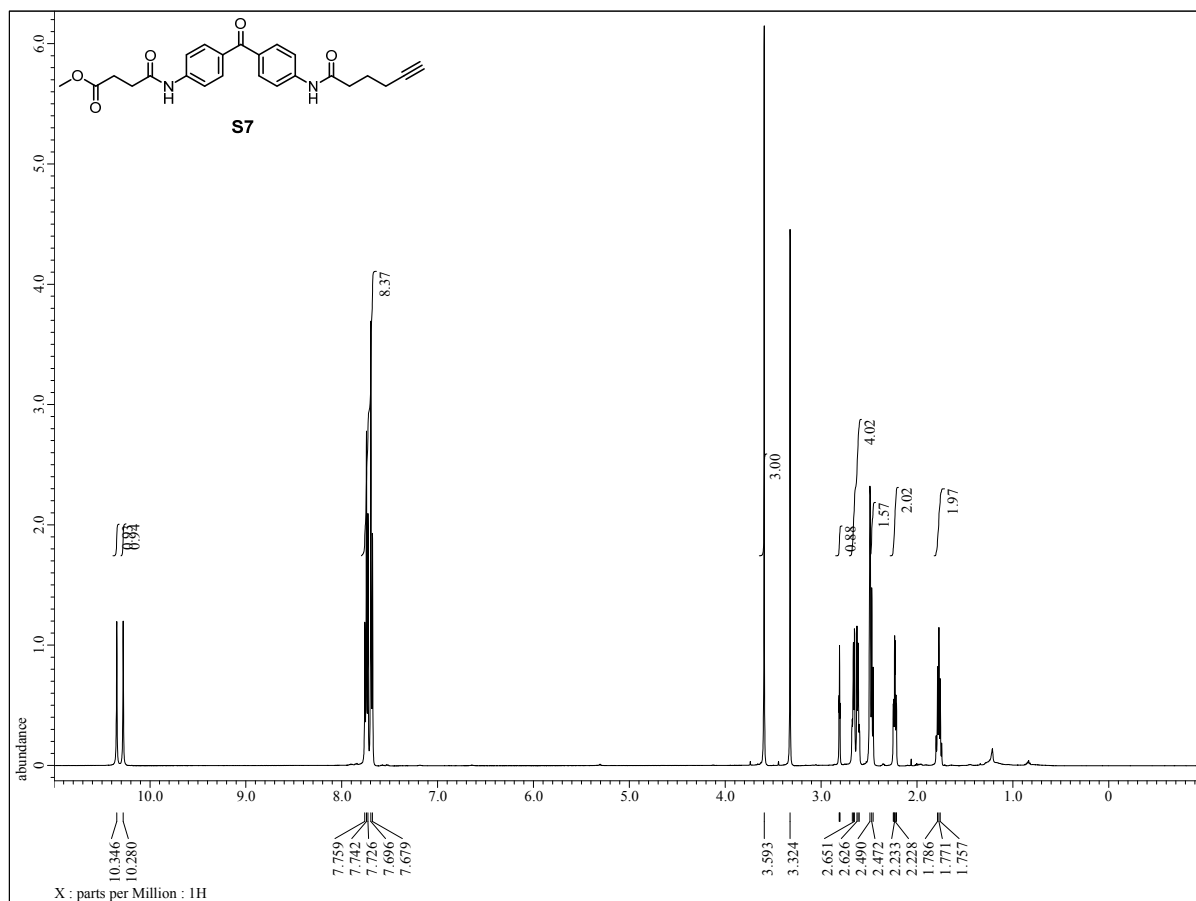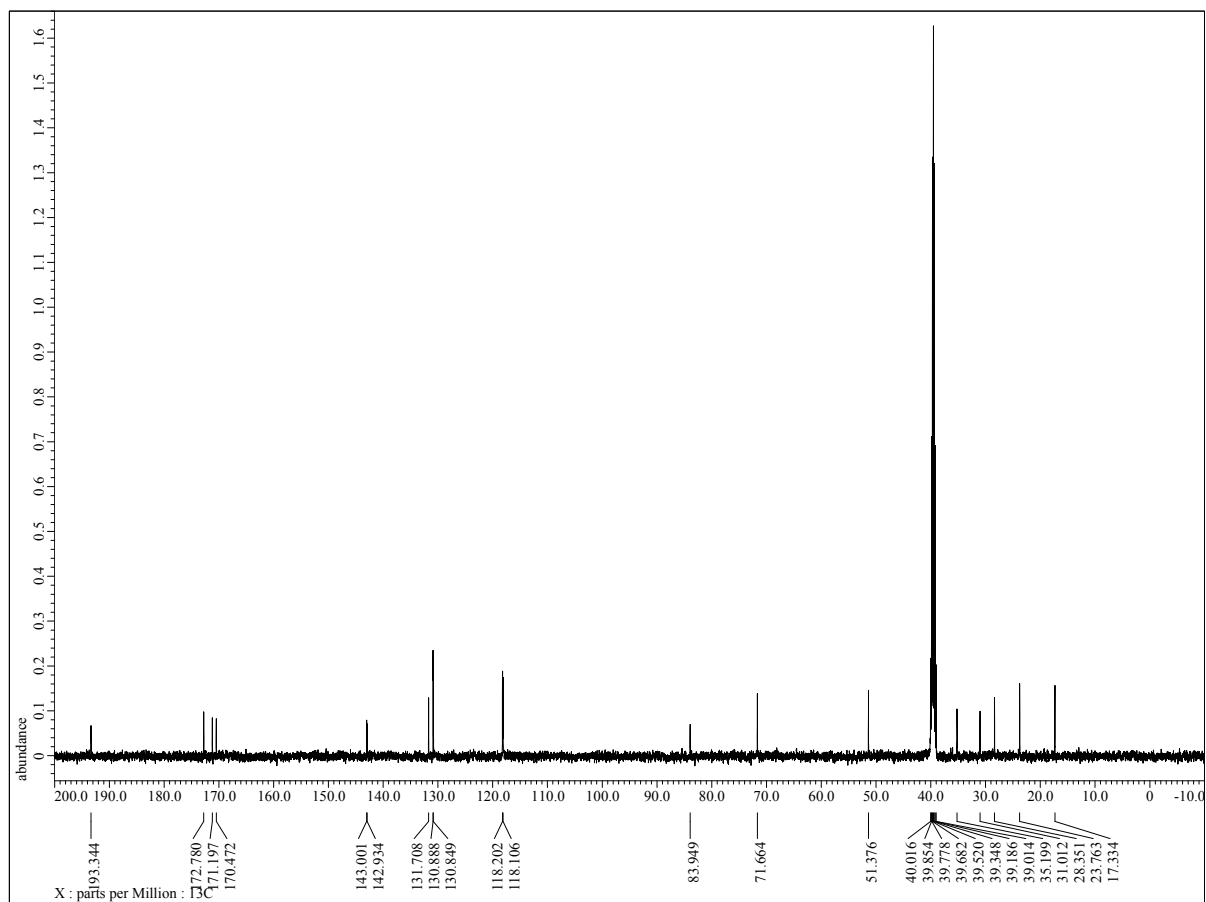

$^1\text{H-NMR}$  (500 MHz) and  $^{13}\text{C-NMR}$  (125 MHz) spectra of **S8** in  $\text{DMSO-}d_6$

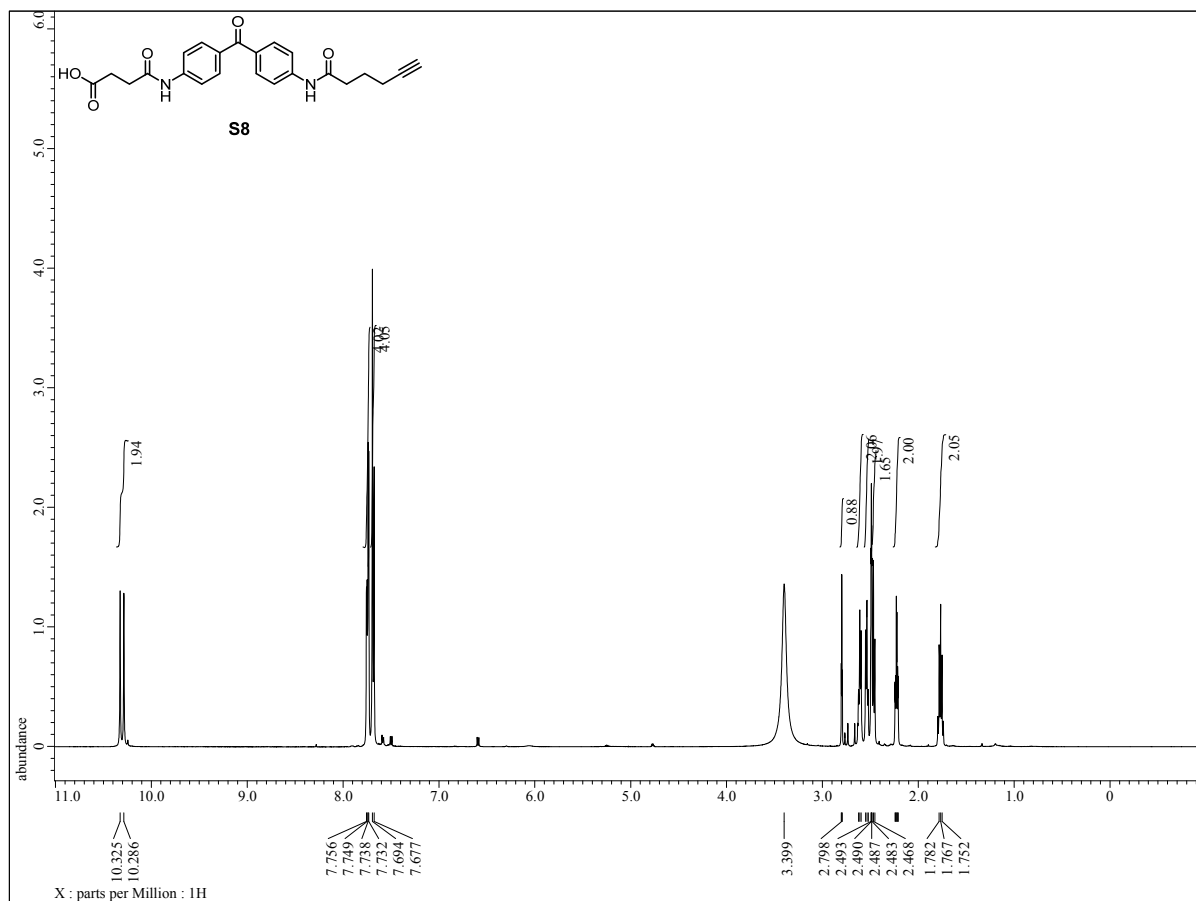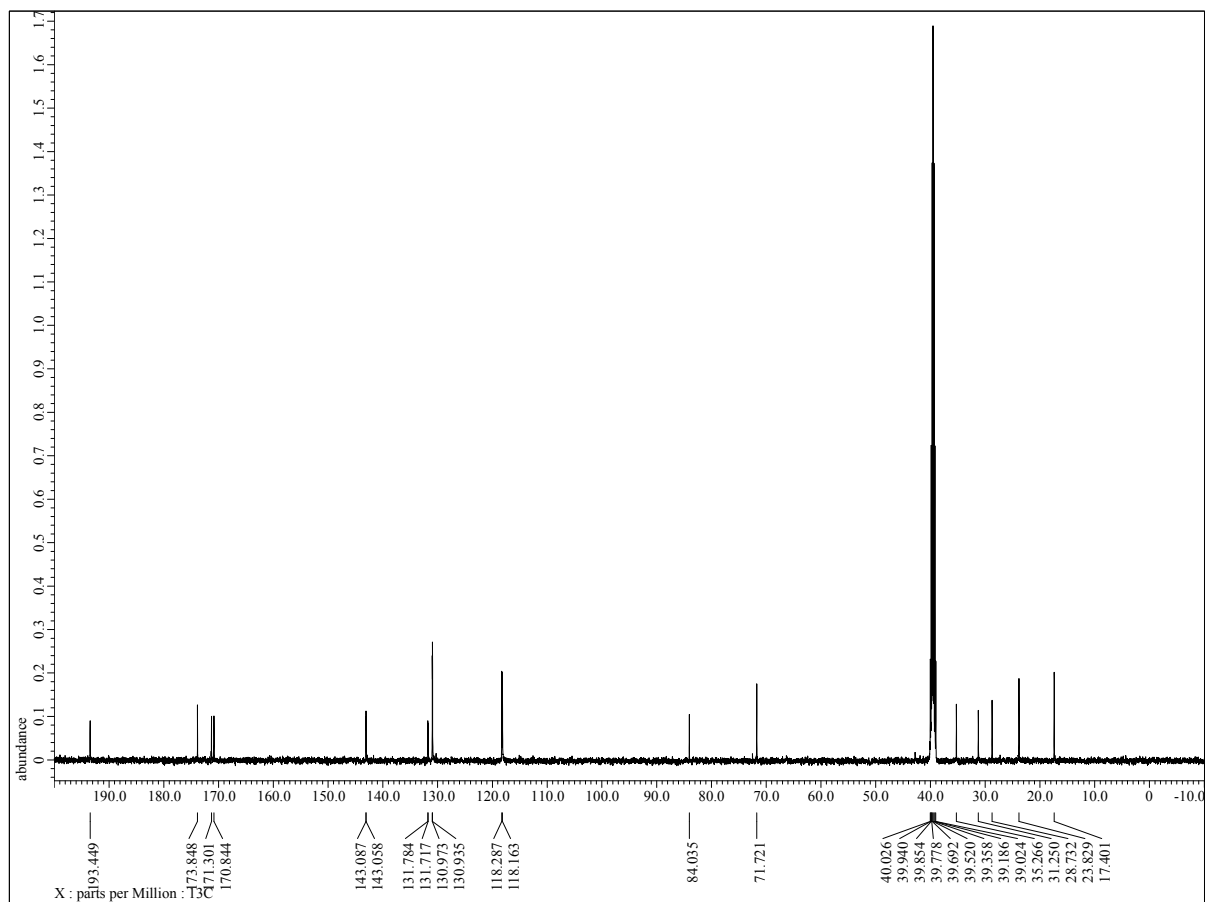

<sup>1</sup>H-NMR (500 MHz) and <sup>13</sup>C-NMR (125 MHz) spectra of **S10a** in CD<sub>3</sub>OD

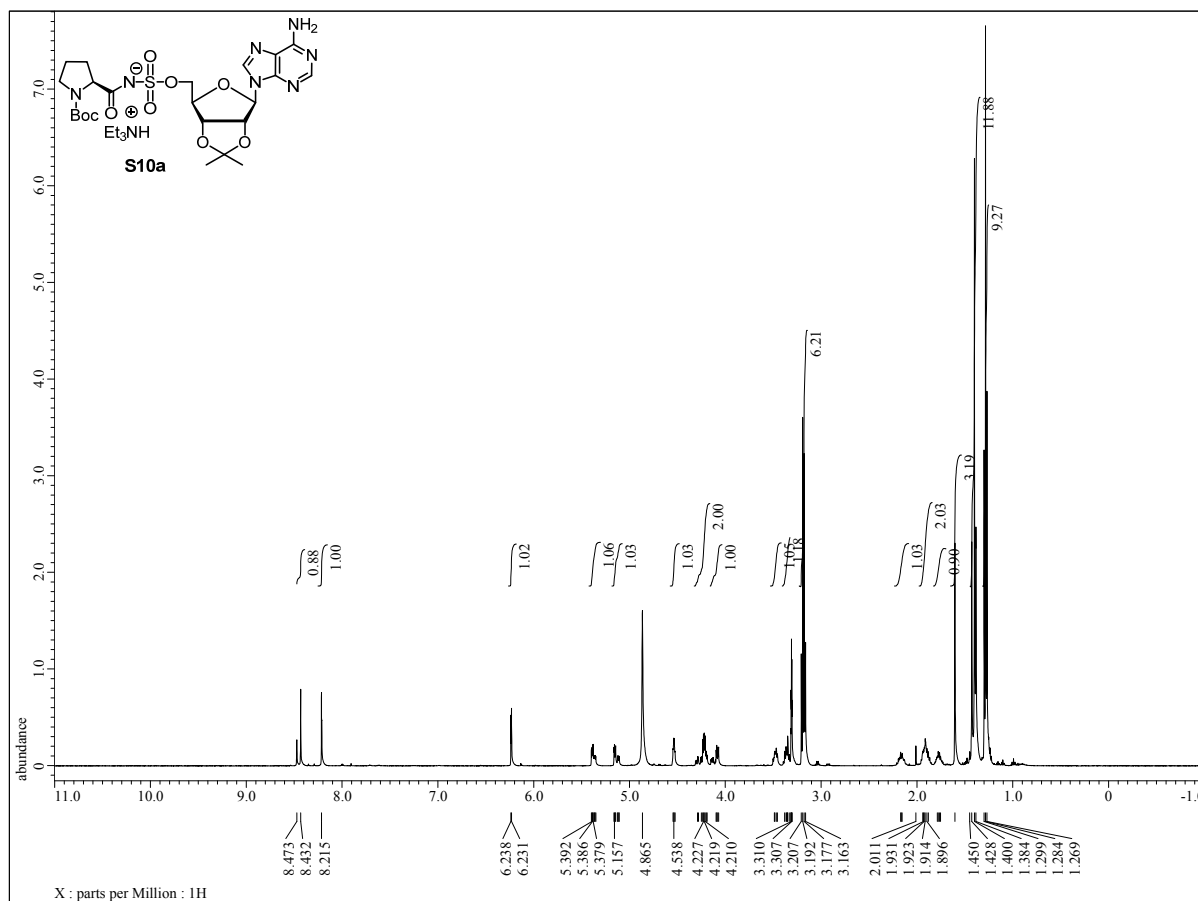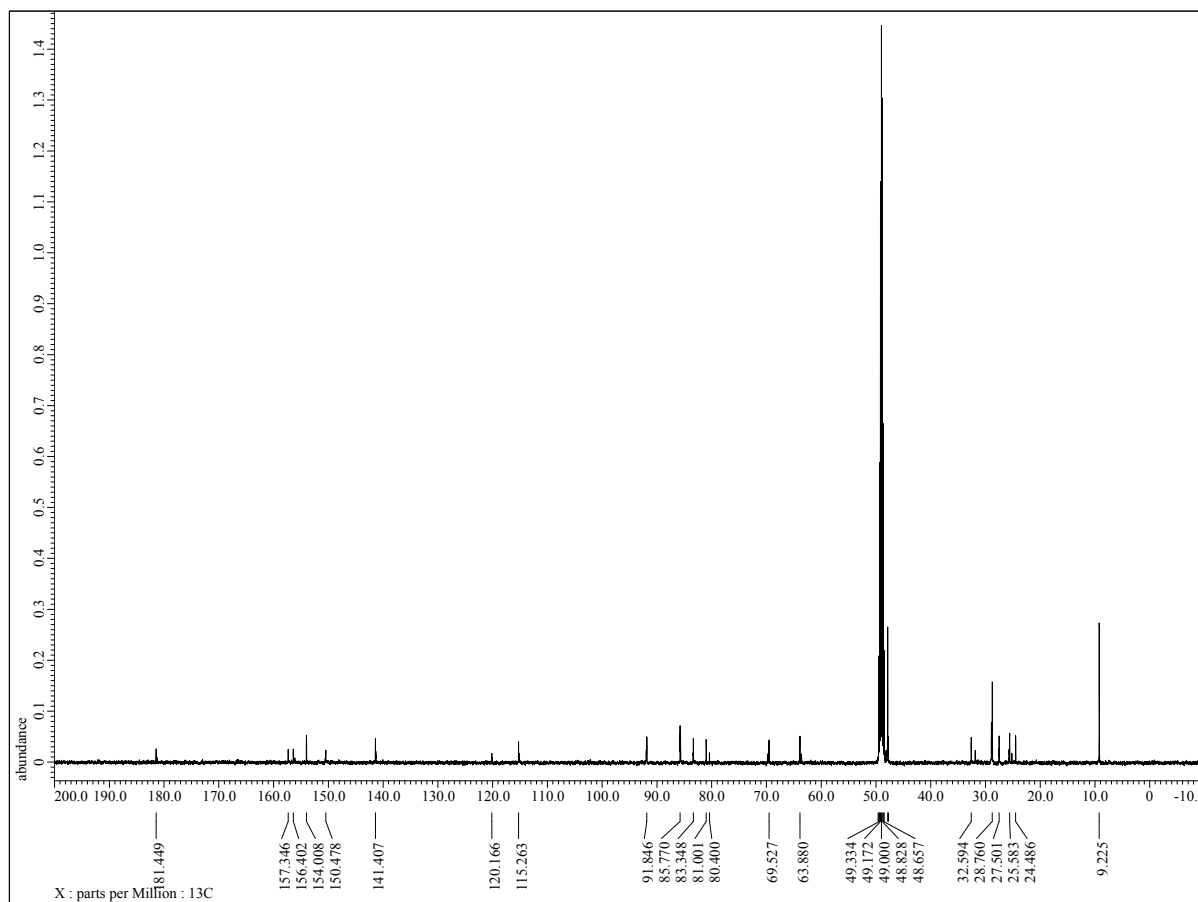

$^1\text{H-NMR}$  (500 MHz) and  $^{13}\text{C-NMR}$  (125 MHz) spectra of **S10b** in  $\text{CD}_3\text{OD}$

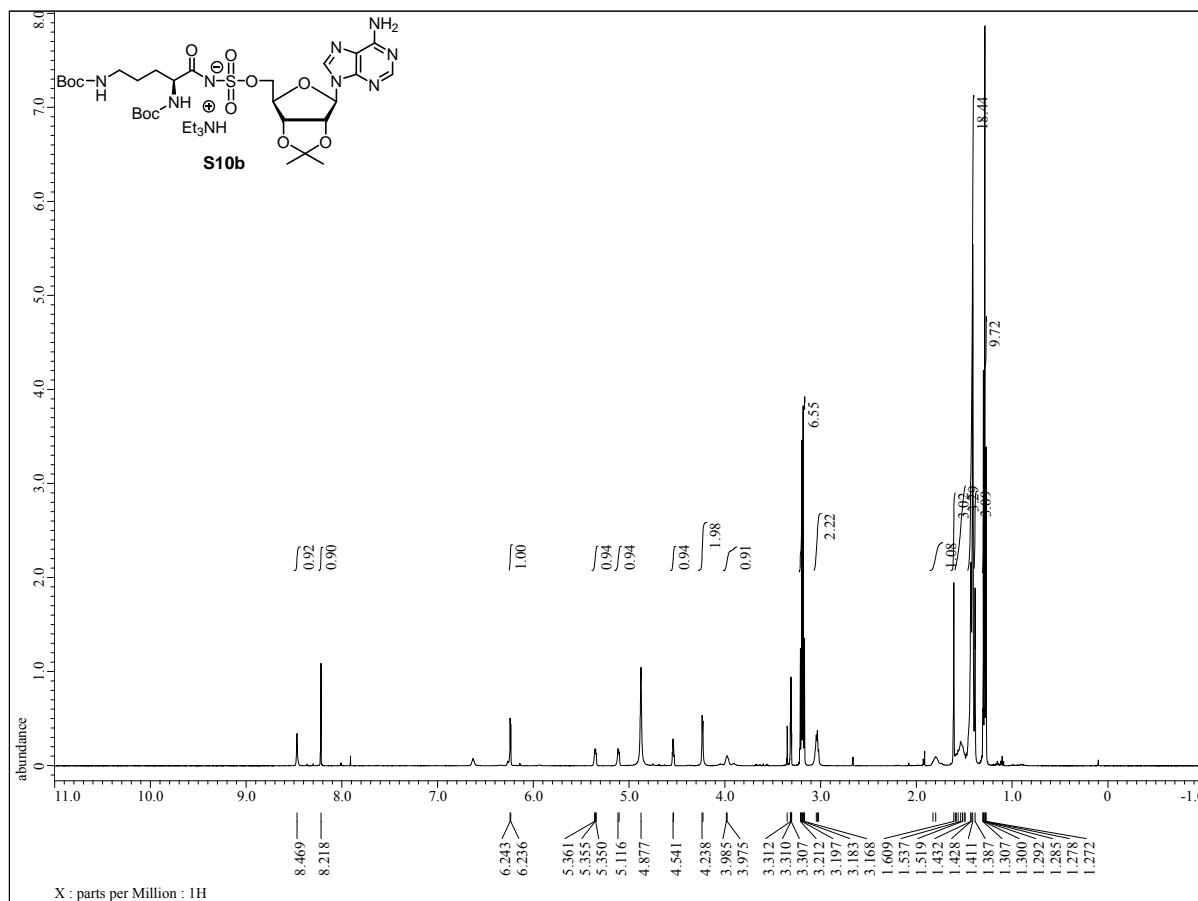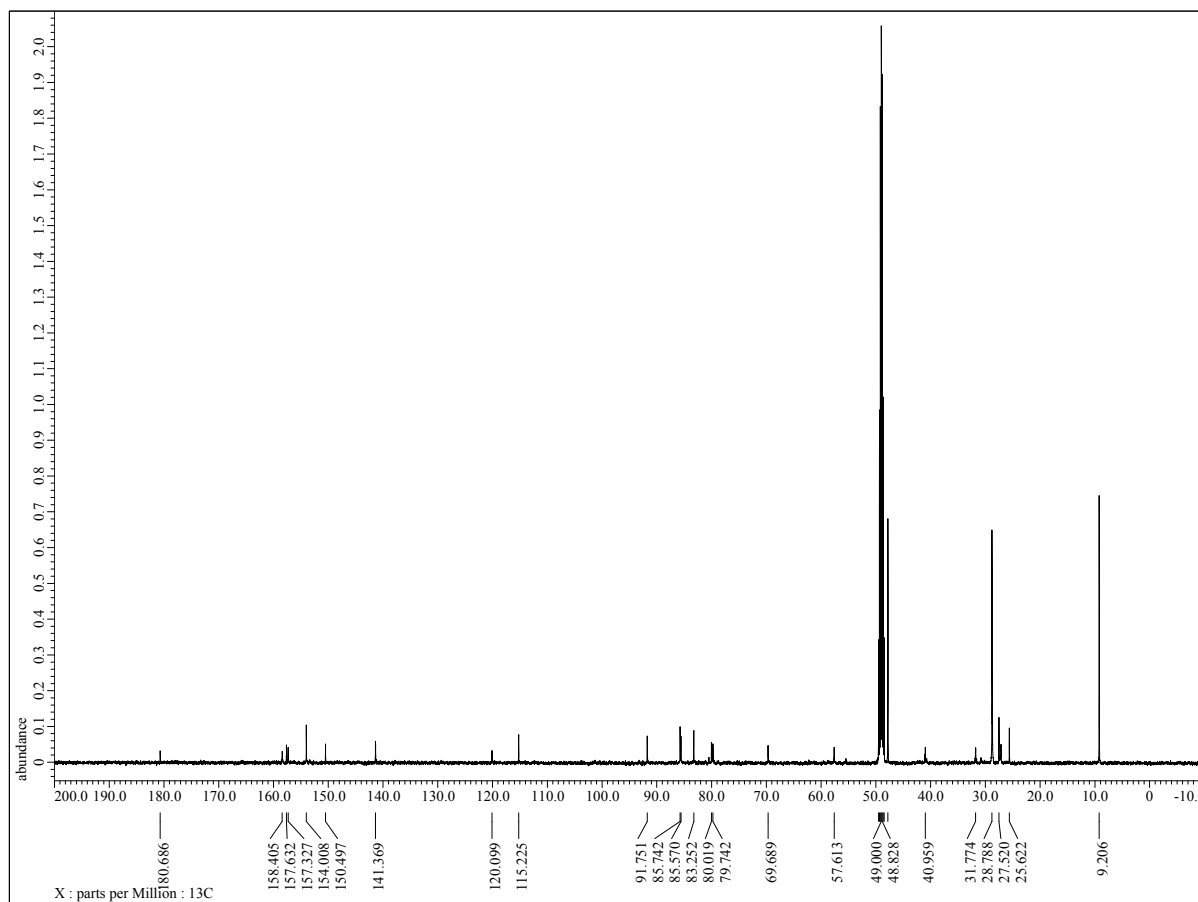

$^1\text{H-NMR}$  (500 MHz) and  $^{13}\text{C-NMR}$  (125 MHz) spectra of **S10c** in  $\text{CD}_3\text{OD}$

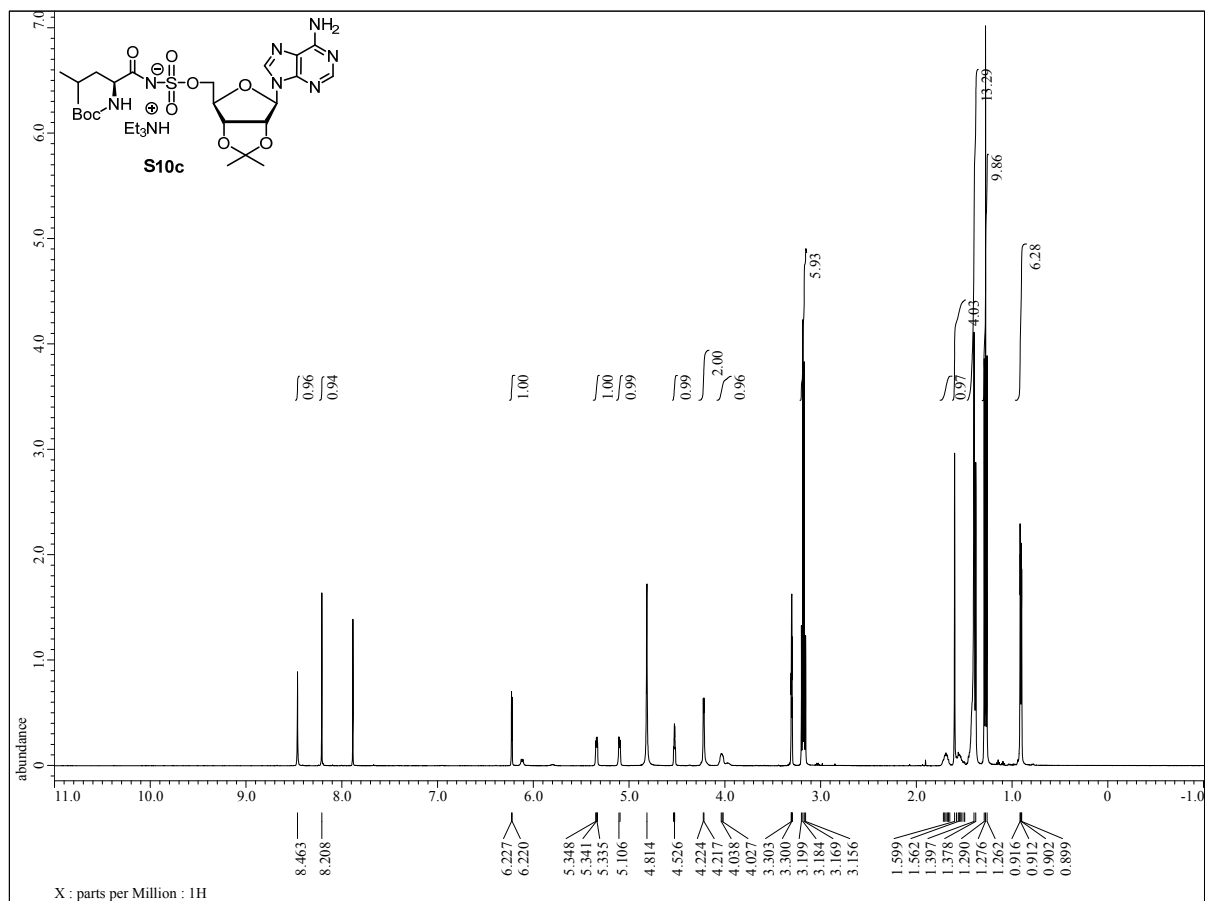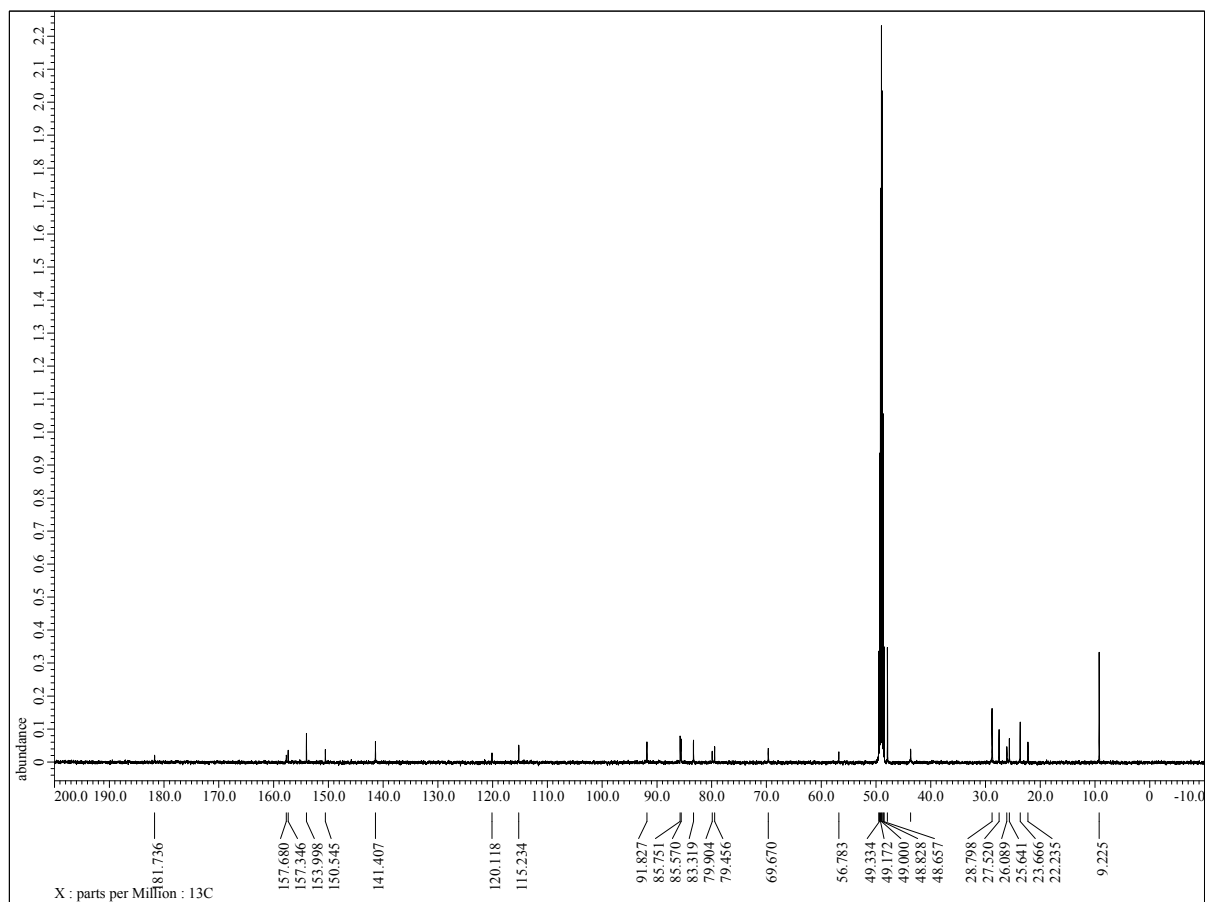

$^1\text{H}$ -NMR (500 MHz) and  $^{13}\text{C}$ -NMR (125 MHz) spectra of **5** in  $\text{DMSO-}d_6$

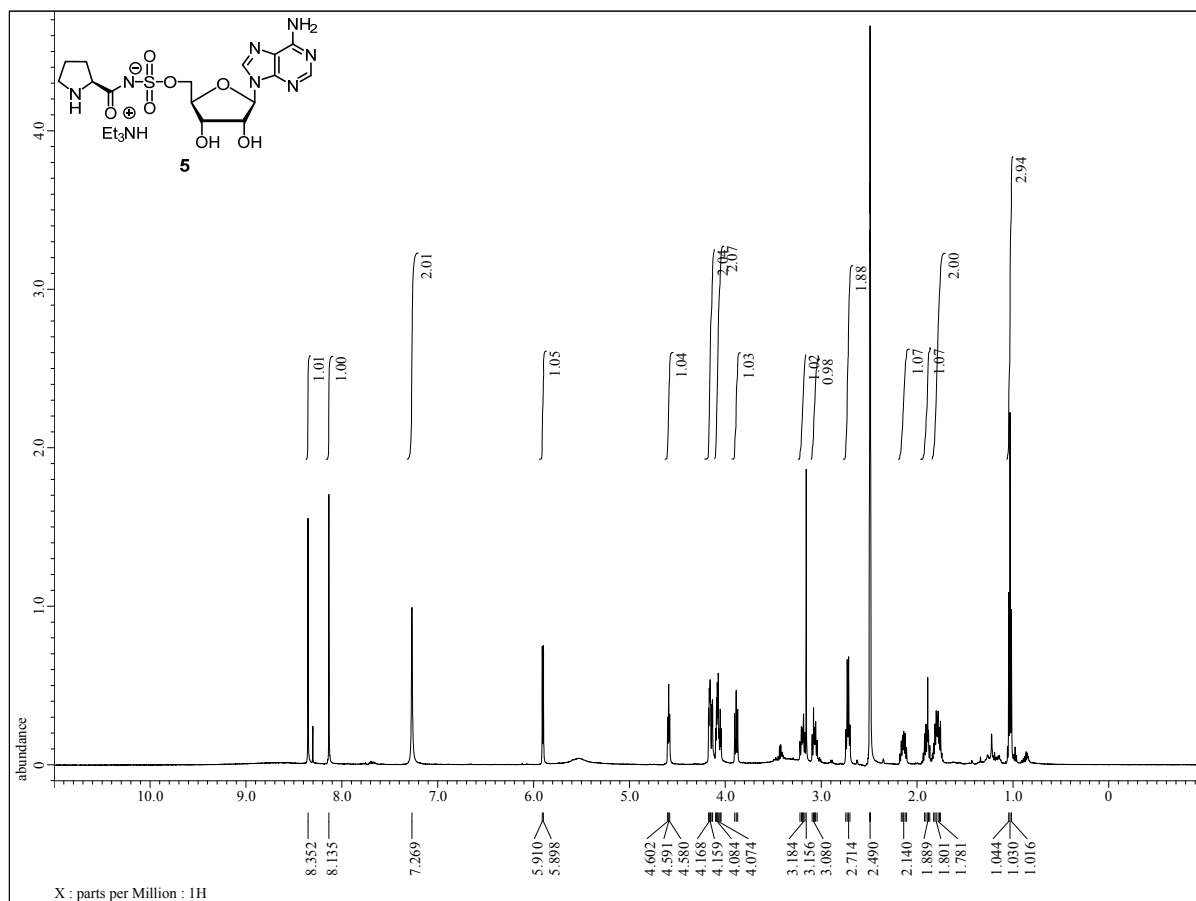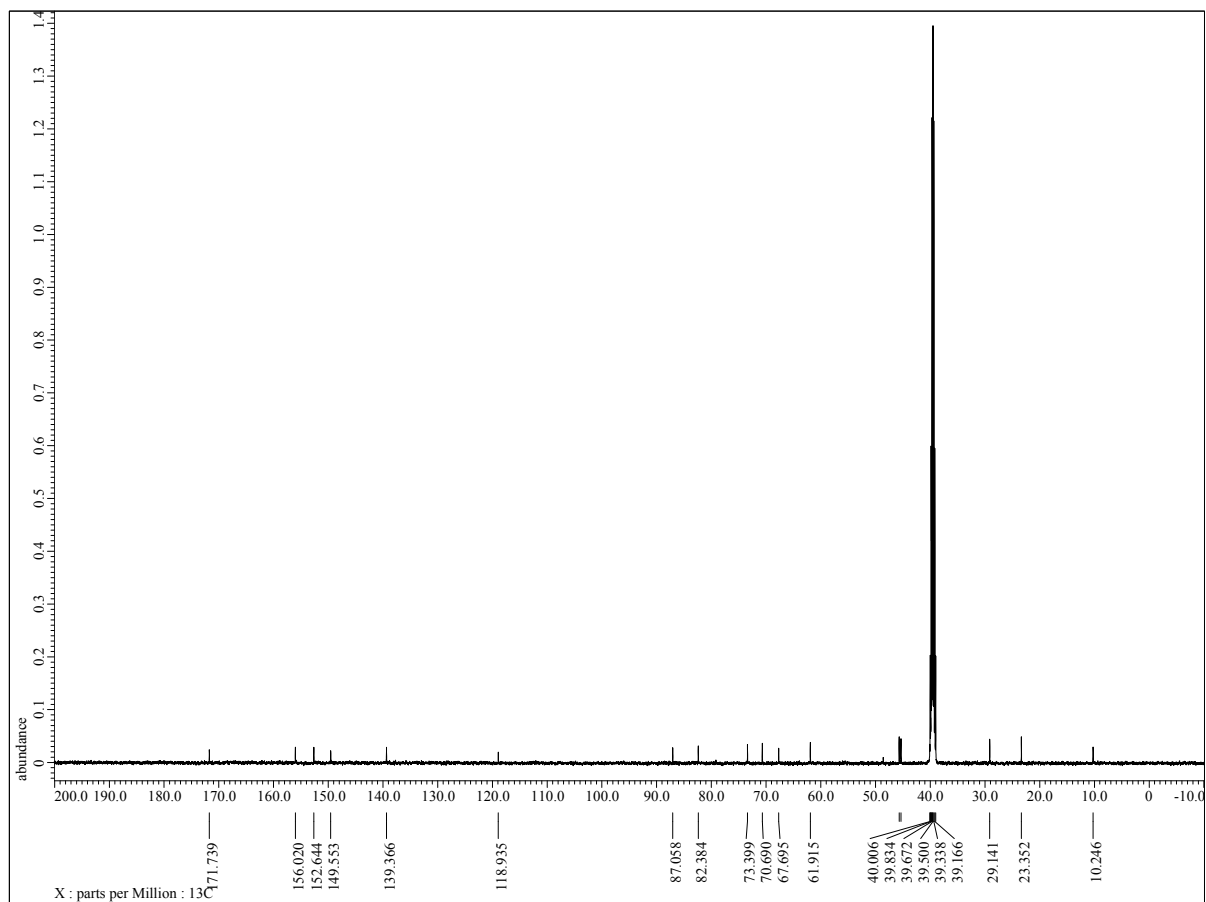

$^1\text{H-NMR}$  (500 MHz) and  $^{13}\text{C-NMR}$  (125 MHz) spectra of **7** in  $\text{CD}_3\text{OD}$

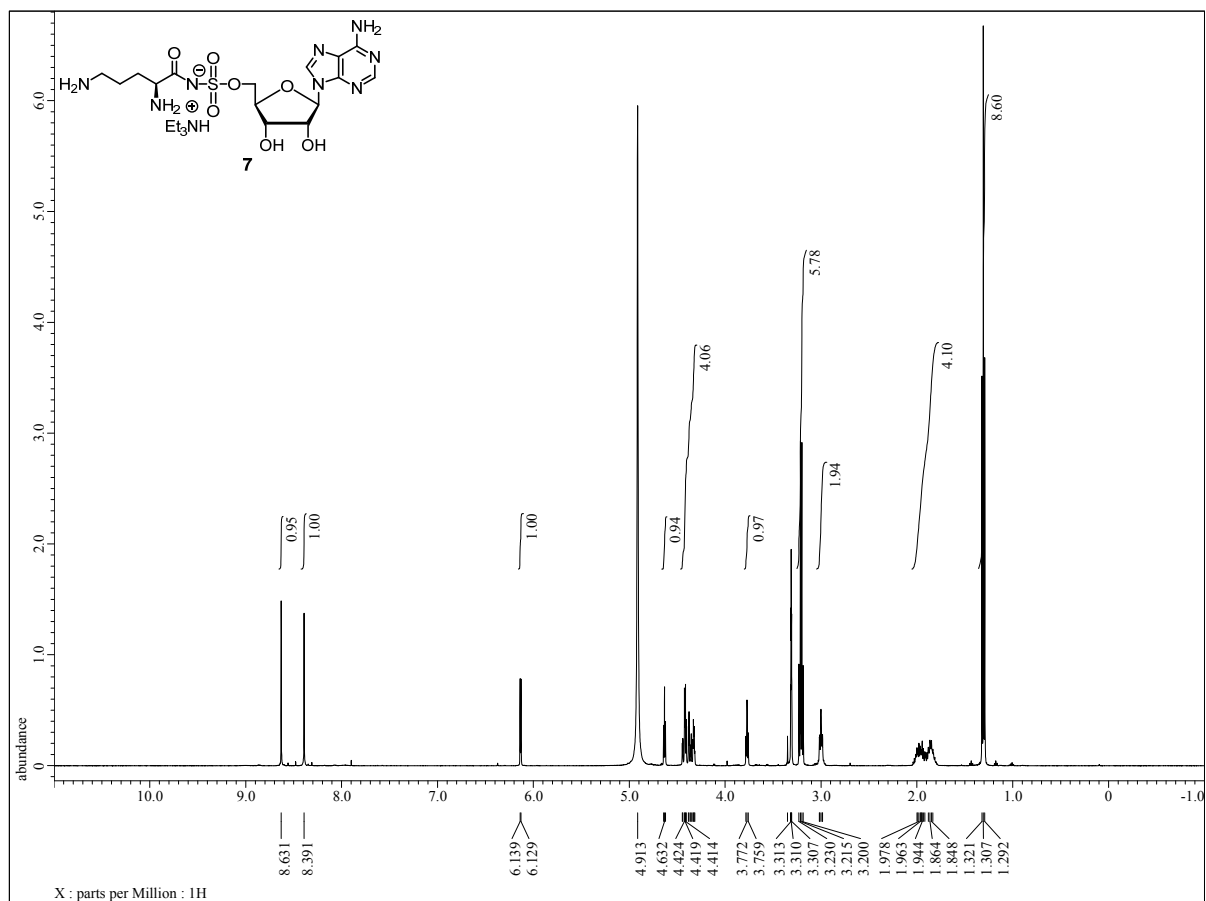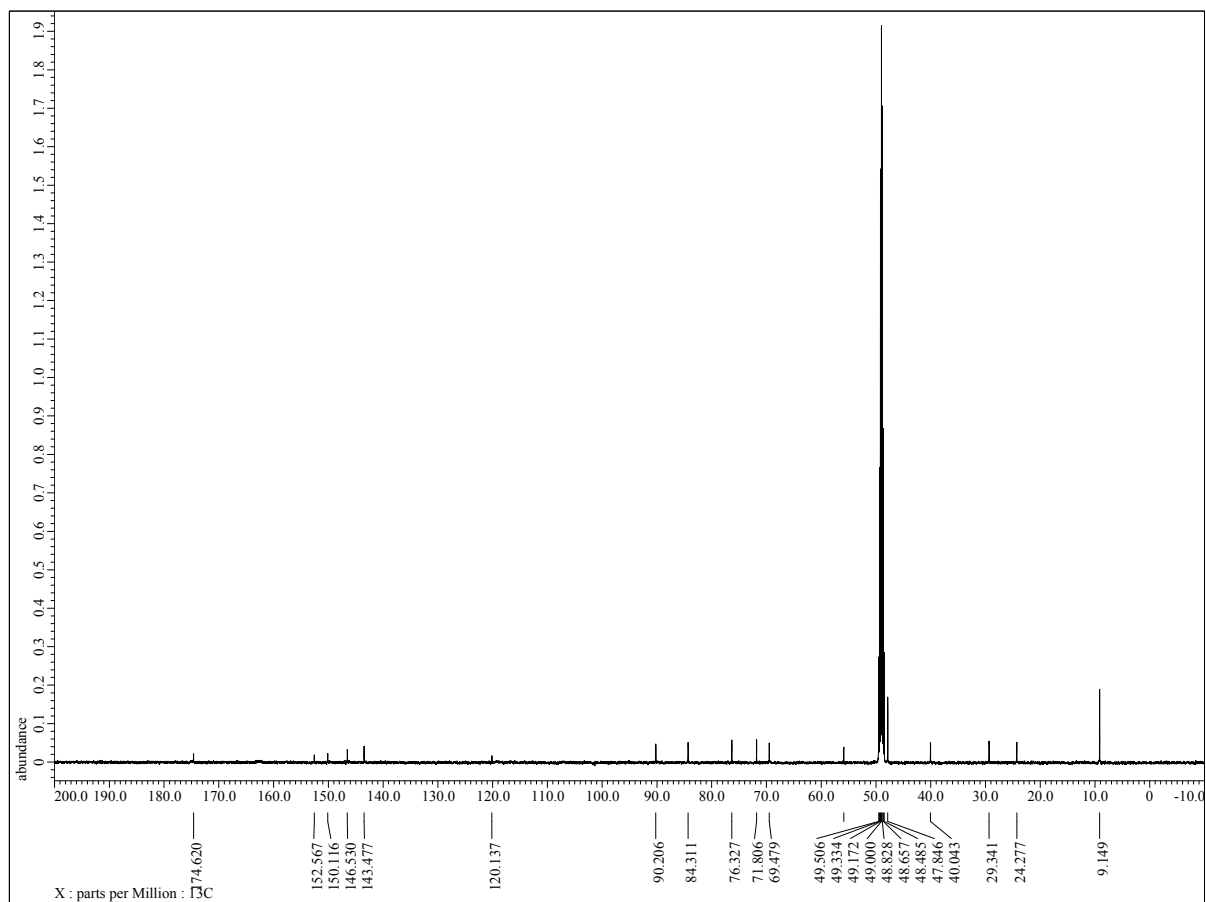

$^1\text{H-NMR}$  (500 MHz) and  $^{13}\text{C-NMR}$  (125 MHz) spectra of **8** in  $\text{CD}_3\text{OD}$

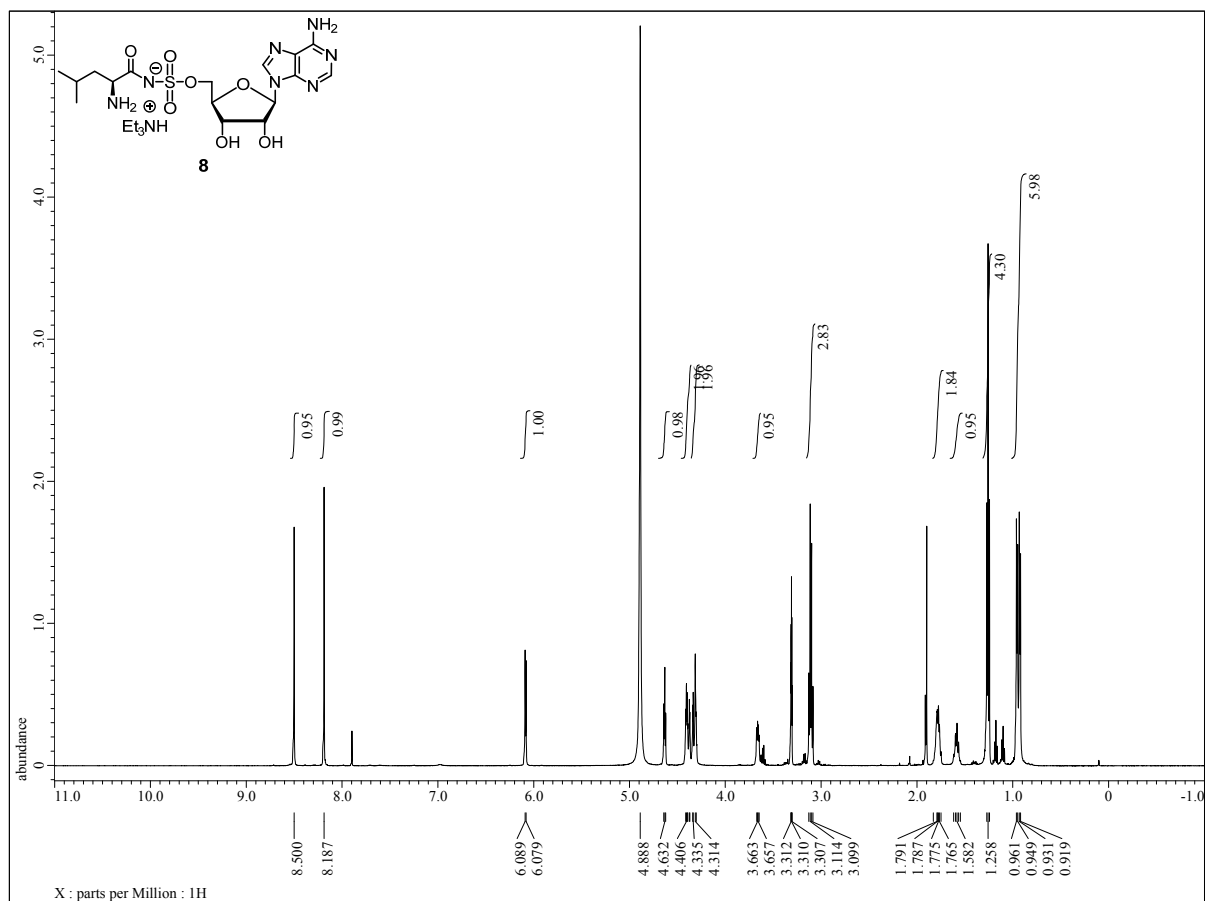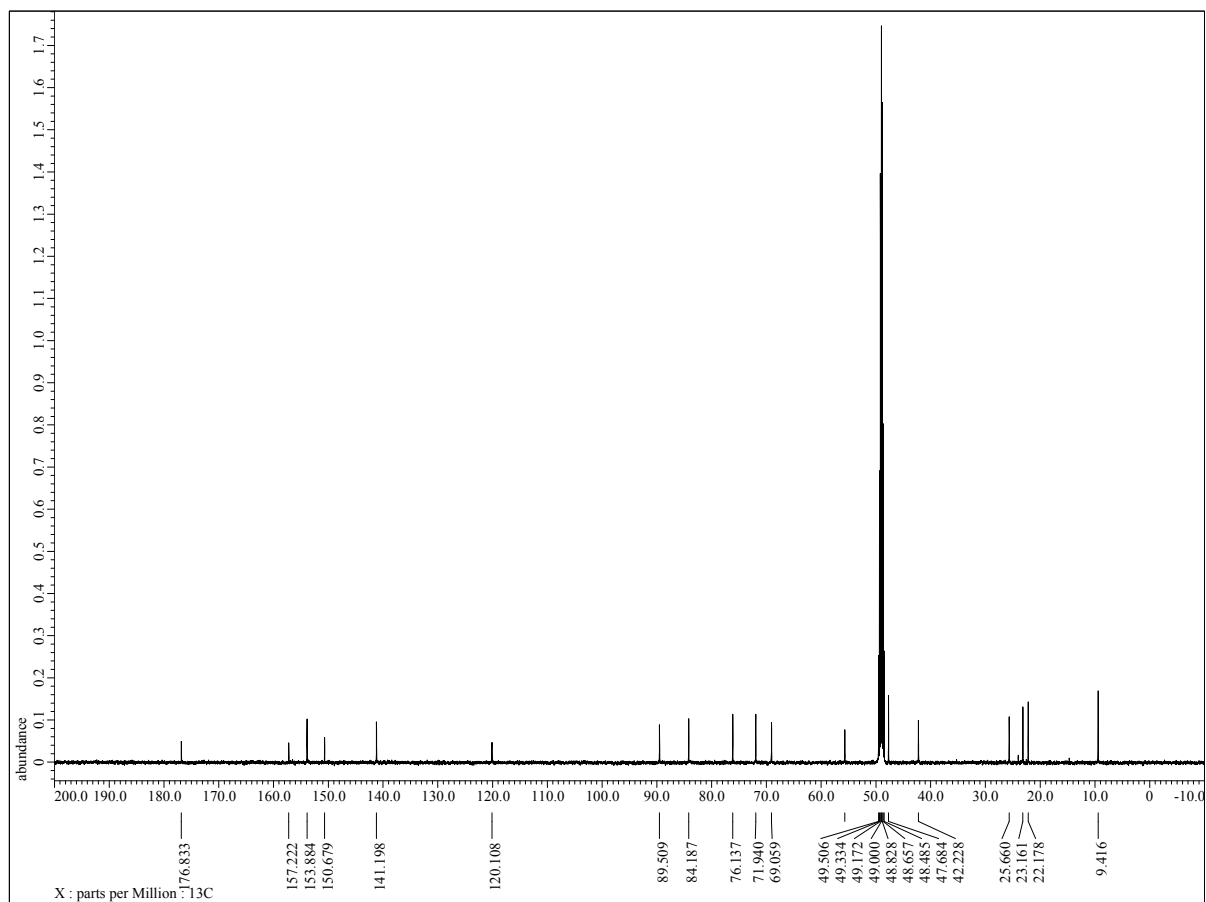

Supplement: c4cc09412c1.pdf [file c4cc09412c1.pdf]
